# Supplementary material
Source: publisher figshare collection journal article supplement (https://acs.figshare.com/ndownloader/files/3626376)
Supplement: Supplementary file 1 [file 3626376]

 
data_cu_PDJDCM1_0m
 
_audit_creation_method            'SHELXL-2014/7'
_shelx_SHELXL_version_number      '2014/7'
_chemical_name_systematic         ?
_chemical_name_common             DCM1
_chemical_melting_point           ?
_chemical_formula_moiety          ?
_chemical_formula_sum
 'C17 H23 N O2' 
_chemical_formula_weight          273.36

loop_
 _atom_type_symbol
 _atom_type_description
 _atom_type_scat_dispersion_real
 _atom_type_scat_dispersion_imag
 _atom_type_scat_source
 'C'  'C'   0.0181   0.0091
 'International Tables Vol C Tables 4.2.6.8 and 6.1.1.4'
 'H'  'H'   0.0000   0.0000
 'International Tables Vol C Tables 4.2.6.8 and 6.1.1.4'
 'N'  'N'   0.0311   0.0180
 'International Tables Vol C Tables 4.2.6.8 and 6.1.1.4'
 'O'  'O'   0.0492   0.0322
 'International Tables Vol C Tables 4.2.6.8 and 6.1.1.4'
 
_space_group_crystal_system       orthorhombic
_space_group_IT_number            19
_space_group_name_H-M_alt         'P 21 21 21'
_space_group_name_Hall            'P 2ac 2ab'
 
_shelx_space_group_comment
;
The symmetry employed for this shelxl refinement is uniquely defined
by the following loop, which should always be used as a source of
symmetry information in preference to the above space-group names.
They are only intended as comments.
;
 
loop_
 _space_group_symop_operation_xyz
 'x, y, z'
 '-x+1/2, -y, z+1/2'
 '-x, y+1/2, -z+1/2'
 'x+1/2, -y+1/2, -z'
 
_cell_length_a                    6.3463(4)
_cell_length_b                    14.4931(9)
_cell_length_c                    16.2263(9)
_cell_angle_alpha                 90
_cell_angle_beta                  90
_cell_angle_gamma                 90
_cell_volume                      1492.46(16)
_cell_formula_units_Z             4
_cell_measurement_temperature     100(2)
_cell_measurement_reflns_used     5079
_cell_measurement_theta_min       4.0898
_cell_measurement_theta_max       69.5080
 
_exptl_crystal_description        'rectangular rod'
_exptl_crystal_colour             ?
_exptl_crystal_density_meas       ?
_exptl_crystal_density_method     'not measured'
_exptl_crystal_density_diffrn     1.217
_exptl_crystal_F_000              592
_exptl_transmission_factor_min    ?
_exptl_transmission_factor_max    ?
_exptl_crystal_size_max           0.173
_exptl_crystal_size_mid           0.044
_exptl_crystal_size_min           0.043
_exptl_absorpt_coefficient_mu     0.623
_shelx_estimated_absorpt_T_min    0.900
_shelx_estimated_absorpt_T_max    0.974
_exptl_absorpt_correction_type    multi-scan
_exptl_absorpt_correction_T_min   0.89
_exptl_absorpt_correction_T_max   0.97
_exptl_absorpt_process_details    'SADABS V2014/2 (Bruker AXS Inc.)'
_exptl_absorpt_special_details    ?
_diffrn_ambient_temperature       100(2)
_diffrn_radiation_wavelength      1.54178
_diffrn_radiation_type            CuK\a
_diffrn_source                    'ImuS micro--focus source'
_diffrn_measurement_device_type   'BRUKER APEX II CCD'
_diffrn_measurement_method        ?
_diffrn_detector_area_resol_mean  8.3333
_diffrn_reflns_number             10687
_diffrn_reflns_av_unetI/netI      0.0194
_diffrn_reflns_av_R_equivalents   0.0219
_diffrn_reflns_limit_h_min        -7
_diffrn_reflns_limit_h_max        7
_diffrn_reflns_limit_k_min        -17
_diffrn_reflns_limit_k_max        15
_diffrn_reflns_limit_l_min        -19
_diffrn_reflns_limit_l_max        18
_diffrn_reflns_theta_min          5.452
_diffrn_reflns_theta_max          68.216
_diffrn_reflns_theta_full         67.679
_diffrn_measured_fraction_theta_max   0.994
_diffrn_measured_fraction_theta_full  0.997
_diffrn_reflns_Laue_measured_fraction_max    0.994
_diffrn_reflns_Laue_measured_fraction_full   0.997
_diffrn_reflns_point_group_measured_fraction_max   0.996
_diffrn_reflns_point_group_measured_fraction_full  0.998
_reflns_number_total              2718
_reflns_number_gt                 2611
_reflns_threshold_expression      'I > 2\s(I)'
_reflns_Friedel_coverage          0.711
_reflns_Friedel_fraction_max      0.999
_reflns_Friedel_fraction_full     1.000
 
_reflns_special_details
;
 Reflections were merged by SHELXL according to the crystal
 class for the calculation of statistics and refinement.
 
 _reflns_Friedel_fraction is defined as the number of unique
 Friedel pairs measured divided by the number that would be
 possible theoretically, ignoring centric projections and
 systematic absences.
;
 
_computing_data_collection        ?
_computing_cell_refinement        'SAINT V8.34A (Bruker AXS Inc., 2013)'
_computing_data_reduction         'SAINT V8.34A (Bruker AXS Inc., 2013)'
_computing_structure_solution     'SHELXL-2014 (Sheldrick, 2014)'
_computing_structure_refinement 'SHELXL-2014/7 (Sheldrick, 2014)'
_computing_molecular_graphics     ?
_computing_publication_material   ?
_refine_special_details
;
 Refined as a 2-component inversion twin.
;
_refine_ls_structure_factor_coef  Fsqd
_refine_ls_matrix_type            full
_refine_ls_weighting_scheme       calc
_refine_ls_weighting_details
'w=1/[\s^2^(Fo^2^)+(0.0414P)^2^+0.1961P] where P=(Fo^2^+2Fc^2^)/3'
_atom_sites_solution_primary      ?
_atom_sites_solution_secondary    ?
_atom_sites_solution_hydrogens    geom
_refine_ls_hydrogen_treatment     constr
_refine_ls_extinction_method      none
_refine_ls_extinction_coef        .
_refine_ls_abs_structure_details
;
 Refined as an inversion twin.
;
_refine_ls_abs_structure_Flack    0.4(2)
_chemical_absolute_configuration  ad
_refine_ls_number_reflns          2718
_refine_ls_number_parameters      185
_refine_ls_number_restraints      0
_refine_ls_R_factor_all           0.0282
_refine_ls_R_factor_gt            0.0270
_refine_ls_wR_factor_ref          0.0719
_refine_ls_wR_factor_gt           0.0712
_refine_ls_goodness_of_fit_ref    1.086
_refine_ls_restrained_S_all       1.086
_refine_ls_shift/su_max           0.000
_refine_ls_shift/su_mean          0.000
 
loop_
 _atom_site_label
 _atom_site_type_symbol
 _atom_site_fract_x
 _atom_site_fract_y
 _atom_site_fract_z
 _atom_site_U_iso_or_equiv
 _atom_site_adp_type
 _atom_site_occupancy
 _atom_site_site_symmetry_order  
 _atom_site_calc_flag
 _atom_site_refinement_flags_posn
 _atom_site_refinement_flags_adp
 _atom_site_refinement_flags_occupancy
 _atom_site_disorder_assembly
 _atom_site_disorder_group
O1 O 0.69444(19) 0.43940(8) 0.13932(7) 0.0270(3) Uani 1 1 d . . . . .
N1 N 0.5247(2) 0.50046(9) 0.24627(8) 0.0195(3) Uani 1 1 d . . . . .
C1 C 0.4919(3) 0.13036(16) 0.51745(12) 0.0401(5) Uani 1 1 d . . . . .
H1A H 0.5232 0.1736 0.5622 0.060 Uiso 1 1 calc R U . . .
H1B H 0.4859 0.0674 0.5395 0.060 Uiso 1 1 calc R U . . .
H1C H 0.3558 0.1462 0.4926 0.060 Uiso 1 1 calc R U . . .
O2 O 0.87836(18) 0.53147(8) 0.22318(8) 0.0287(3) Uani 1 1 d . . . . .
C2 C 0.8713(3) 0.09595(14) 0.47656(12) 0.0334(4) Uani 1 1 d . . . . .
H2A H 0.8525 0.0316 0.4935 0.050 Uiso 1 1 calc R U . . .
H2B H 0.9313 0.1313 0.5224 0.050 Uiso 1 1 calc R U . . .
H2C H 0.9670 0.0987 0.4292 0.050 Uiso 1 1 calc R U . . .
C3 C 0.6619(3) 0.13620(12) 0.45303(11) 0.0277(4) Uani 1 1 d . . . . .
C4 C 0.6339(3) 0.17548(11) 0.37941(11) 0.0271(4) Uani 1 1 d . . . . .
H4 H 0.7514 0.1741 0.3432 0.033 Uiso 1 1 calc R U . . .
C5 C 0.4389(3) 0.22160(12) 0.34707(11) 0.0270(4) Uani 1 1 d . . . . .
H5A H 0.3512 0.2424 0.3940 0.032 Uiso 1 1 calc R U . . .
H5B H 0.3558 0.1766 0.3147 0.032 Uiso 1 1 calc R U . . .
C6 C 0.4931(3) 0.30441(11) 0.29261(11) 0.0246(4) Uani 1 1 d . . . . .
H6A H 0.5692 0.2821 0.2432 0.029 Uiso 1 1 calc R U . . .
H6B H 0.5895 0.3456 0.3234 0.029 Uiso 1 1 calc R U . . .
C7 C 0.3007(3) 0.36041(11) 0.26463(10) 0.0216(3) Uani 1 1 d . . . . .
H7 H 0.2338 0.3870 0.3151 0.026 Uiso 1 1 calc R U . . .
C8 C 0.1338(3) 0.30160(12) 0.22099(12) 0.0283(4) Uani 1 1 d . . . . .
H8A H 0.0689 0.2594 0.2608 0.043 Uiso 1 1 calc R U . . .
H8B H 0.2005 0.2659 0.1768 0.043 Uiso 1 1 calc R U . . .
H8C H 0.0254 0.3419 0.1975 0.043 Uiso 1 1 calc R U . . .
C9 C 0.3629(3) 0.44137(10) 0.20857(10) 0.0202(3) Uani 1 1 d . . . . .
H9 H 0.2354 0.4790 0.1952 0.024 Uiso 1 1 calc R U . . .
C10 C 0.4758(3) 0.41355(12) 0.12840(10) 0.0246(4) Uani 1 1 d . . . . .
H10A H 0.4633 0.3463 0.1190 0.030 Uiso 1 1 calc R U . . .
H10B H 0.4140 0.4464 0.0807 0.030 Uiso 1 1 calc R U . . .
C11 C 0.7129(3) 0.49466(11) 0.20625(10) 0.0226(3) Uani 1 1 d . . . . .
C12 C 0.4905(3) 0.55385(10) 0.31849(9) 0.0189(3) Uani 1 1 d . . . . .
C13 C 0.2911(3) 0.59133(11) 0.33302(10) 0.0223(3) Uani 1 1 d . . . . .
H13 H 0.1797 0.5806 0.2951 0.027 Uiso 1 1 calc R U . . .
C14 C 0.2561(3) 0.64435(12) 0.40297(10) 0.0263(4) Uani 1 1 d . . . . .
H14 H 0.1206 0.6701 0.4124 0.032 Uiso 1 1 calc R U . . .
C15 C 0.4167(3) 0.66006(12) 0.45916(11) 0.0276(4) Uani 1 1 d . . . . .
H15 H 0.3922 0.6968 0.5067 0.033 Uiso 1 1 calc R U . . .
C16 C 0.6140(3) 0.62150(12) 0.44515(10) 0.0274(4) Uani 1 1 d . . . . .
H16 H 0.7242 0.6314 0.4837 0.033 Uiso 1 1 calc R U . . .
C17 C 0.6518(3) 0.56853(11) 0.37523(10) 0.0237(4) Uani 1 1 d . . . . .
H17 H 0.7871 0.5424 0.3662 0.028 Uiso 1 1 calc R U . . .
 
loop_
 _atom_site_aniso_label
 _atom_site_aniso_U_11
 _atom_site_aniso_U_22
 _atom_site_aniso_U_33
 _atom_site_aniso_U_23
 _atom_site_aniso_U_13
 _atom_site_aniso_U_12
O1 0.0211(6) 0.0335(7) 0.0265(6) -0.0059(5) 0.0020(5) 0.0041(5)
N1 0.0172(7) 0.0194(6) 0.0218(6) -0.0007(5) 0.0000(5) -0.0004(5)
C1 0.0346(10) 0.0505(12) 0.0352(10) 0.0113(9) -0.0027(9) -0.0018(10)
O2 0.0162(6) 0.0360(6) 0.0339(7) -0.0036(5) 0.0013(5) 0.0001(5)
C2 0.0353(10) 0.0309(9) 0.0341(10) 0.0007(7) -0.0069(8) 0.0016(8)
C3 0.0320(10) 0.0207(8) 0.0303(9) -0.0012(6) -0.0059(7) -0.0033(7)
C4 0.0292(9) 0.0213(8) 0.0309(9) -0.0006(7) 0.0008(7) 0.0008(7)
C5 0.0290(9) 0.0205(8) 0.0315(9) 0.0002(7) -0.0021(7) -0.0002(7)
C6 0.0233(8) 0.0224(8) 0.0280(8) 0.0008(6) -0.0036(7) 0.0011(7)
C7 0.0207(7) 0.0199(7) 0.0241(8) -0.0024(6) 0.0000(6) -0.0006(6)
C8 0.0244(9) 0.0239(8) 0.0367(10) -0.0019(7) -0.0059(7) -0.0016(7)
C9 0.0192(8) 0.0196(7) 0.0219(8) -0.0030(6) -0.0029(6) 0.0017(6)
C10 0.0241(8) 0.0277(9) 0.0222(8) -0.0032(6) -0.0013(7) 0.0005(7)
C11 0.0203(8) 0.0233(8) 0.0242(8) 0.0011(6) 0.0002(6) 0.0056(7)
C12 0.0219(8) 0.0153(7) 0.0195(7) 0.0020(5) 0.0014(7) -0.0027(6)
C13 0.0201(8) 0.0226(8) 0.0242(8) -0.0003(6) -0.0001(7) 0.0002(6)
C14 0.0278(9) 0.0231(8) 0.0280(9) -0.0010(6) 0.0037(7) 0.0018(7)
C15 0.0376(10) 0.0224(8) 0.0228(8) -0.0031(7) 0.0041(7) -0.0058(7)
C16 0.0299(9) 0.0288(9) 0.0236(8) 0.0017(7) -0.0049(7) -0.0085(7)
C17 0.0210(8) 0.0248(8) 0.0253(8) 0.0032(6) -0.0018(7) -0.0023(7)
 
_geom_special_details
;
 All esds (except the esd in the dihedral angle between two l.s. planes)
 are estimated using the full covariance matrix.  The cell esds are taken
 into account individually in the estimation of esds in distances, angles
 and torsion angles; correlations between esds in cell parameters are only
 used when they are defined by crystal symmetry.  An approximate (isotropic)
 treatment of cell esds is used for estimating esds involving l.s. planes.
;
 
loop_
 _geom_bond_atom_site_label_1
 _geom_bond_atom_site_label_2
 _geom_bond_distance
 _geom_bond_site_symmetry_2
 _geom_bond_publ_flag
O1 C11 1.354(2) . ?
O1 C10 1.448(2) . ?
N1 C11 1.362(2) . ?
N1 C12 1.421(2) . ?
N1 C9 1.470(2) . ?
C1 C3 1.505(3) . ?
C1 H1A 0.9800 . ?
C1 H1B 0.9800 . ?
C1 H1C 0.9800 . ?
O2 C11 1.209(2) . ?
C2 C3 1.501(3) . ?
C2 H2A 0.9800 . ?
C2 H2B 0.9800 . ?
C2 H2C 0.9800 . ?
C3 C4 1.335(3) . ?
C4 C5 1.501(3) . ?
C4 H4 0.9500 . ?
C5 C6 1.530(2) . ?
C5 H5A 0.9900 . ?
C5 H5B 0.9900 . ?
C6 C7 1.535(2) . ?
C6 H6A 0.9900 . ?
C6 H6B 0.9900 . ?
C7 C8 1.533(2) . ?
C7 C9 1.536(2) . ?
C7 H7 1.0000 . ?
C8 H8A 0.9800 . ?
C8 H8B 0.9800 . ?
C8 H8C 0.9800 . ?
C9 C10 1.539(2) . ?
C9 H9 1.0000 . ?
C10 H10A 0.9900 . ?
C10 H10B 0.9900 . ?
C12 C17 1.393(2) . ?
C12 C13 1.397(2) . ?
C13 C14 1.389(2) . ?
C13 H13 0.9500 . ?
C14 C15 1.386(3) . ?
C14 H14 0.9500 . ?
C15 C16 1.390(3) . ?
C15 H15 0.9500 . ?
C16 C17 1.391(2) . ?
C16 H16 0.9500 . ?
C17 H17 0.9500 . ?
 
loop_
 _geom_angle_atom_site_label_1
 _geom_angle_atom_site_label_2
 _geom_angle_atom_site_label_3
 _geom_angle
 _geom_angle_site_symmetry_1
 _geom_angle_site_symmetry_3
 _geom_angle_publ_flag
C11 O1 C10 109.51(12) . . ?
C11 N1 C12 124.11(14) . . ?
C11 N1 C9 112.21(13) . . ?
C12 N1 C9 123.62(13) . . ?
C3 C1 H1A 109.5 . . ?
C3 C1 H1B 109.5 . . ?
H1A C1 H1B 109.5 . . ?
C3 C1 H1C 109.5 . . ?
H1A C1 H1C 109.5 . . ?
H1B C1 H1C 109.5 . . ?
C3 C2 H2A 109.5 . . ?
C3 C2 H2B 109.5 . . ?
H2A C2 H2B 109.5 . . ?
C3 C2 H2C 109.5 . . ?
H2A C2 H2C 109.5 . . ?
H2B C2 H2C 109.5 . . ?
C4 C3 C2 120.75(18) . . ?
C4 C3 C1 123.36(17) . . ?
C2 C3 C1 115.88(16) . . ?
C3 C4 C5 127.76(17) . . ?
C3 C4 H4 116.1 . . ?
C5 C4 H4 116.1 . . ?
C4 C5 C6 111.48(14) . . ?
C4 C5 H5A 109.3 . . ?
C6 C5 H5A 109.3 . . ?
C4 C5 H5B 109.3 . . ?
C6 C5 H5B 109.3 . . ?
H5A C5 H5B 108.0 . . ?
C5 C6 C7 114.03(14) . . ?
C5 C6 H6A 108.7 . . ?
C7 C6 H6A 108.7 . . ?
C5 C6 H6B 108.7 . . ?
C7 C6 H6B 108.7 . . ?
H6A C6 H6B 107.6 . . ?
C8 C7 C6 113.09(13) . . ?
C8 C7 C9 109.19(14) . . ?
C6 C7 C9 112.02(14) . . ?
C8 C7 H7 107.4 . . ?
C6 C7 H7 107.4 . . ?
C9 C7 H7 107.4 . . ?
C7 C8 H8A 109.5 . . ?
C7 C8 H8B 109.5 . . ?
H8A C8 H8B 109.5 . . ?
C7 C8 H8C 109.5 . . ?
H8A C8 H8C 109.5 . . ?
H8B C8 H8C 109.5 . . ?
N1 C9 C7 112.21(13) . . ?
N1 C9 C10 100.32(12) . . ?
C7 C9 C10 114.83(13) . . ?
N1 C9 H9 109.7 . . ?
C7 C9 H9 109.7 . . ?
C10 C9 H9 109.7 . . ?
O1 C10 C9 105.95(12) . . ?
O1 C10 H10A 110.5 . . ?
C9 C10 H10A 110.5 . . ?
O1 C10 H10B 110.5 . . ?
C9 C10 H10B 110.5 . . ?
H10A C10 H10B 108.7 . . ?
O2 C11 O1 121.19(15) . . ?
O2 C11 N1 128.75(15) . . ?
O1 C11 N1 110.05(14) . . ?
C17 C12 C13 119.65(14) . . ?
C17 C12 N1 121.06(15) . . ?
C13 C12 N1 119.29(14) . . ?
C14 C13 C12 119.87(16) . . ?
C14 C13 H13 120.1 . . ?
C12 C13 H13 120.1 . . ?
C15 C14 C13 120.72(17) . . ?
C15 C14 H14 119.6 . . ?
C13 C14 H14 119.6 . . ?
C14 C15 C16 119.25(16) . . ?
C14 C15 H15 120.4 . . ?
C16 C15 H15 120.4 . . ?
C15 C16 C17 120.72(16) . . ?
C15 C16 H16 119.6 . . ?
C17 C16 H16 119.6 . . ?
C16 C17 C12 119.79(16) . . ?
C16 C17 H17 120.1 . . ?
C12 C17 H17 120.1 . . ?
 
_refine_diff_density_max    0.158
_refine_diff_density_min   -0.163
_refine_diff_density_rms    0.032

_shelx_res_file
;

    cu_PDJDCM1_0m.res created by SHELXL-2014/7


TITL cu_PDJDCM1_0m in P2(1)2(1)2(1)
CELL 1.54178   6.34630  14.49310  16.22630  90.0000  90.0000  90.0000
ZERR    4.00   0.00040   0.00090   0.00090   0.0000   0.0000   0.0000
LATT -1
SYMM 1/2-X, -Y, 1/2+Z
SYMM -X, 1/2+Y, 1/2-Z
SYMM 1/2+X, 1/2-Y, -Z
SFAC C H N O
UNIT 68 92 4 8
TEMP -173.230
SIZE 0.043 0.044 0.173
L.S. 10
BOND $H
LIST 4
ACTA
FMAP 2
PLAN 20
TWIN
WGHT    0.041400    0.196100
BASF   0.40344
FVAR       0.24753
O1    4    0.694435    0.439396    0.139325    11.00000    0.02112    0.03346 =
         0.02652   -0.00587    0.00204    0.00408
N1    3    0.524664    0.500463    0.246266    11.00000    0.01717    0.01941 =
         0.02179   -0.00073    0.00005   -0.00040
C1    1    0.491891    0.130362    0.517451    11.00000    0.03463    0.05051 =
         0.03523    0.01133   -0.00272   -0.00177
AFIX 137
H1A   2    0.523220    0.173639    0.562211    11.00000   -1.50000
H1B   2    0.485876    0.067448    0.539460    11.00000   -1.50000
H1C   2    0.355832    0.146201    0.492637    11.00000   -1.50000
AFIX   0
O2    4    0.878356    0.531465    0.223180    11.00000    0.01624    0.03605 =
         0.03385   -0.00357    0.00135    0.00015
C2    1    0.871345    0.095952    0.476558    11.00000    0.03532    0.03087 =
         0.03408    0.00069   -0.00694    0.00159
AFIX 137
H2A   2    0.852517    0.031558    0.493451    11.00000   -1.50000
H2B   2    0.931273    0.131330    0.522381    11.00000   -1.50000
H2C   2    0.966993    0.098686    0.429205    11.00000   -1.50000
AFIX   0
C3    1    0.661949    0.136196    0.453030    11.00000    0.03203    0.02069 =
         0.03030   -0.00116   -0.00588   -0.00329
C4    1    0.633914    0.175479    0.379408    11.00000    0.02919    0.02130 =
         0.03087   -0.00058    0.00079    0.00079
AFIX  43
H4    2    0.751415    0.174072    0.343156    11.00000   -1.20000
AFIX   0
C5    1    0.438911    0.221601    0.347074    11.00000    0.02905    0.02053 =
         0.03151    0.00017   -0.00215   -0.00020
AFIX  23
H5A   2    0.351156    0.242438    0.393957    11.00000   -1.20000
H5B   2    0.355755    0.176552    0.314737    11.00000   -1.20000
AFIX   0
C6    1    0.493059    0.304410    0.292612    11.00000    0.02331    0.02240 =
         0.02799    0.00080   -0.00360    0.00106
AFIX  23
H6A   2    0.569213    0.282123    0.243225    11.00000   -1.20000
H6B   2    0.589454    0.345641    0.323351    11.00000   -1.20000
AFIX   0
C7    1    0.300727    0.360410    0.264628    11.00000    0.02069    0.01992 =
         0.02410   -0.00242   -0.00005   -0.00056
AFIX  13
H7    2    0.233814    0.387025    0.315106    11.00000   -1.20000
AFIX   0
C8    1    0.133841    0.301605    0.220990    11.00000    0.02437    0.02389 =
         0.03675   -0.00186   -0.00586   -0.00163
AFIX 137
H8A   2    0.068934    0.259393    0.260760    11.00000   -1.50000
H8B   2    0.200476    0.265897    0.176817    11.00000   -1.50000
H8C   2    0.025414    0.341927    0.197491    11.00000   -1.50000
AFIX   0
C9    1    0.362908    0.441374    0.208568    11.00000    0.01918    0.01959 =
         0.02192   -0.00304   -0.00292    0.00172
AFIX  13
H9    2    0.235366    0.479043    0.195239    11.00000   -1.20000
AFIX   0
C10   1    0.475830    0.413547    0.128396    11.00000    0.02410    0.02765 =
         0.02215   -0.00321   -0.00126    0.00049
AFIX  23
H10A  2    0.463254    0.346282    0.118981    11.00000   -1.20000
H10B  2    0.414046    0.446380    0.080662    11.00000   -1.20000
AFIX   0
C11   1    0.712879    0.494661    0.206250    11.00000    0.02030    0.02332 =
         0.02419    0.00105    0.00019    0.00563
C12   1    0.490458    0.553848    0.318494    11.00000    0.02191    0.01527 =
         0.01951    0.00196    0.00143   -0.00270
C13   1    0.291078    0.591330    0.333020    11.00000    0.02013    0.02256 =
         0.02422   -0.00030   -0.00005    0.00016
AFIX  43
H13   2    0.179668    0.580567    0.295117    11.00000   -1.20000
AFIX   0
C14   1    0.256078    0.644349    0.402975    11.00000    0.02782    0.02312 =
         0.02802   -0.00104    0.00373    0.00183
AFIX  43
H14   2    0.120595    0.670135    0.412434    11.00000   -1.20000
AFIX   0
C15   1    0.416687    0.660064    0.459163    11.00000    0.03760    0.02243 =
         0.02284   -0.00309    0.00414   -0.00576
AFIX  43
H15   2    0.392172    0.696778    0.506707    11.00000   -1.20000
AFIX   0
C16   1    0.613983    0.621496    0.445147    11.00000    0.02995    0.02876 =
         0.02363    0.00168   -0.00493   -0.00855
AFIX  43
H16   2    0.724222    0.631428    0.483748    11.00000   -1.20000
AFIX   0
C17   1    0.651757    0.568528    0.375234    11.00000    0.02096    0.02478 =
         0.02530    0.00324   -0.00176   -0.00233
AFIX  43
H17   2    0.787121    0.542437    0.366193    11.00000   -1.20000
AFIX   0
HKLF 4

REM  cu_PDJDCM1_0m in P2(1)2(1)2(1)
REM R1 =  0.0270 for    2611 Fo > 4sig(Fo)  and  0.0282 for all    2718 data
REM    185 parameters refined using      0 restraints

END

WGHT      0.0414      0.1961

REM Highest difference peak  0.158,  deepest hole -0.163,  1-sigma level  0.032
Q1    1   0.3394  0.3978  0.2377  11.00000  0.05    0.16
Q2    1   0.4614  0.0580  0.4409  11.00000  0.05    0.14
Q3    1   0.6659  0.2066  0.4246  11.00000  0.05    0.12
Q4    1   0.6116  0.1156  0.4035  11.00000  0.05    0.11
Q5    1   0.3946  0.0769  0.4894  11.00000  0.05    0.11
Q6    1   0.6109  0.5760  0.4139  11.00000  0.05    0.10
Q7    1   0.5659  0.5395  0.3576  11.00000  0.05    0.10
Q8    1   0.5147  0.5216  0.2788  11.00000  0.05    0.10
Q9    1   0.4127  0.4203  0.1744  11.00000  0.05    0.10
Q10   1   0.5906  0.5834  0.3398  11.00000  0.05    0.10
Q11   1   0.6456  0.3391  0.2645  11.00000  0.05    0.10
Q12   1   0.9570  0.0578  0.4387  11.00000  0.05    0.09
Q13   1   0.3847  0.3323  0.2782  11.00000  0.05    0.09
Q14   1   0.3564  0.1899  0.5227  11.00000  0.05    0.09
Q15   1   0.4740  0.2666  0.3200  11.00000  0.05    0.09
Q16   1   0.3262  0.6278  0.4388  11.00000  0.05    0.09
Q17   1   0.8890  0.5063  0.2803  11.00000  0.05    0.09
Q18   1   0.5014  0.2622  0.2547  11.00000  0.05    0.09
Q19   1   0.4672  0.4731  0.0821  11.00000  0.05    0.09
Q20   1   0.5164  0.1014  0.5688  11.00000  0.05    0.09
;
_shelx_res_checksum   24034

_shelx_hkl_file
;
   1   0   0   -0.01    0.03
   2   0   0    7.44    0.20
   3   0   0   -0.09    0.06
   4   0   0    1.31    0.12
   4   0   0    1.46    0.11
   5   0   0    0.13    0.10
  -5   0   0    0.10    0.18
   5   0   0    0.02    0.14
   6   0   0   32.12    0.80
  -6   0   0   32.94    0.88
   6   0   0   29.99    0.77
  -7   0   0   -0.15    0.14
   1   1   0   11.23    0.26
   1  -1   0   11.61    0.27
   2   1   0    7.35    0.19
   2  -1   0    6.93    0.20
   3  -1   0    0.58    0.08
   3   1   0    0.54    0.07
   4   1   0   12.05    0.36
   4  -1   0   12.49    0.36
   4   1   0   11.94    0.34
   4  -1   0   11.89    0.33
   5  -1   0    0.64    0.15
   5  -1   0    0.66    0.11
  -5  -1   0    0.65    0.19
   5   1   0    0.25    0.15
   5   1   0    0.58    0.12
  -5   1   0    0.67    0.20
   6   1   0    2.10    0.16
  -6   1   0    1.89    0.24
   6  -1   0    1.97    0.18
  -6  -1   0    2.39    0.24
  -7  -1   0    0.14    0.15
  -7   1   0    0.12    0.15
   1   2   0   75.28    1.66
   1  -2   0   75.44    1.67
   2  -2   0   23.56    0.55
   2   2   0   23.52    0.54
   3   2   0    0.96    0.08
   3  -2   0    0.80    0.09
   4  -2   0    2.98    0.16
   4  -2   0    2.82    0.16
  -5   2   0    3.05    0.27
   5   2   0    4.11    0.21
   5  -2   0    3.05    0.20
   5  -2   0    3.22    0.22
   6   2   0    8.72    0.31
  -6  -2   0    9.44    0.41
   6  -2   0    8.49    0.33
  -6   2   0    8.79    0.43
  -7  -2   0    1.22    0.16
  -7   2   0    0.90    0.17
   0  -3   0   -0.03    0.03
   1   3   0  779.76   17.23
   1  -3   0  794.04   17.25
   2   3   0   38.91    0.88
   2  -3   0   38.77    0.89
   3   3   0    0.03    0.07
   3  -3   0    0.06    0.07
   4  -3   0    5.52    0.24
  -5   3   0    0.63    0.21
   5  -3   0    0.46    0.17
  -5  -3   0    0.35    0.18
   5   3   0    0.68    0.12
   5  -3   0    0.60    0.14
   6  -3   0   24.61    0.65
  -6   3   0   24.62    0.73
   6   3   0   24.37    0.63
  -6  -3   0   25.38    0.72
  -7   3   0   -0.04    0.14
  -7  -3   0    0.16    0.13
   7  -3   0    0.13    0.12
   0  -4   0  187.40    4.11
  -1  -4   0  185.92    4.11
   1   4   0  188.96    4.11
   1  -4   0  188.03    4.12
   2  -4   0   33.43    0.77
   2   4   0   32.81    0.75
   3  -4   0  145.99    3.25
   4  -4   0    0.68    0.12
   5   4   0   25.51    0.65
  -5   4   0   25.66    0.76
  -5  -4   0   25.57    0.71
   5  -4   0   25.87    0.68
   5  -4   0   24.99    0.70
  -5  -4   0   25.45    0.72
  -6   4   0    0.07    0.19
   6  -4   0    0.15    0.13
   6   4   0    0.07    0.11
  -6  -4   0    0.18    0.17
  -7  -4   0    0.17    0.13
   7  -4   0    0.09    0.11
  -7   4   0    0.08    0.14
   0  -5   0   -0.04    0.03
  -1  -5   0   38.51    0.88
   1  -5   0   39.84    0.89
   2  -5   0    5.84    0.19
   3  -5   0    1.42    0.12
   3  -5   0    1.44    0.13
   4  -5   0   11.58    0.38
  -4  -5   0   11.72    0.42
   4  -5   0   11.34    0.37
  -5   5   0   20.10    0.67
   5  -5   0   21.00    0.58
  -5  -5   0   21.00    0.63
  -5  -5   0   21.24    0.62
  -6  -5   0    8.47    0.38
   6  -5   0    8.92    0.33
   6   5   0    9.02    0.31
  -6  -5   0    9.28    0.38
  -6   5   0    8.97    0.42
  -7   5   0    3.11    0.20
   7  -5   0    3.19    0.19
  -7  -5   0    3.07    0.18
   0  -6   0   18.11    0.43
  -1  -6   0   22.71    0.53
   1  -6   0   23.00    0.54
   2  -6   0    1.87    0.11
   3  -6   0   15.93    0.43
   3  -6   0   15.48    0.45
  -4  -6   0    2.00    0.20
   4  -6   0    1.88    0.16
   4  -6   0    2.10    0.17
  -4  -6   0    2.20    0.22
   4  -6   0    2.09    0.15
  -5  -6   0    0.45    0.18
  -5   6   0    0.26    0.22
   5  -6   0    0.17    0.13
  -5  -6   0    0.30    0.18
   6   6   0    3.04    0.18
   6  -6   0    2.95    0.19
  -6  -6   0    2.87    0.22
  -6   6   0    2.82    0.25
  -6  -6   0    2.85    0.22
   7  -6   0    0.83    0.11
  -7  -6   0    0.74    0.13
   0  -7   0   -0.07    0.04
   1  -7   0   12.24    0.32
   2  -7   0  126.85    2.86
   2  -7   0  127.44    2.83
   3  -7   0   15.41    0.42
   3  -7   0   14.62    0.45
   4  -7   0    2.74    0.21
  -4  -7   0    2.49    0.22
   4  -7   0    2.49    0.18
   4  -7   0    2.76    0.16
   4  -7   0    2.76    0.19
  -4  -7   0    2.54    0.23
   5  -7   0    0.10    0.13
  -5  -7   0    0.14    0.17
  -5  -7   0    0.28    0.17
  -6  -7   0    6.01    0.31
  -6  -7   0    6.41    0.31
   6  -7   0    6.20    0.27
   6   7   0    6.76    0.26
   0  -8   0    9.30    0.26
   0  -8   0    9.70    0.30
   1  -8   0    2.18    0.13
   1  -8   0    2.01    0.14
   2  -8   0    1.84    0.12
   2  -8   0    1.70    0.15
   3  -8   0   36.41    0.92
   3  -8   0   35.76    0.88
   3  -8   0   36.80    0.88
   3  -8   0   35.04    0.85
  -3  -8   0   36.02    0.92
   4  -8   0   17.61    0.47
   4  -8   0   17.41    0.54
  -4  -8   0   18.35    0.56
   4  -8   0   17.62    0.51
  -5  -8   0    0.11    0.18
   5  -8   0    0.24    0.13
  -5  -8   0    0.39    0.16
  -6  -8   0    8.65    0.35
  -6  -8   0    8.98    0.34
   6  -8   0    9.01    0.31
   6   8   0    9.08    0.30
   0  -9   0    0.04    0.09
   0  -9   0    0.02    0.07
   0  -9   0   -0.06    0.09
   1  -9   0    2.96    0.20
   1  -9   0    3.23    0.16
   2  -9   0    6.04    0.27
   2  -9   0    5.91    0.23
   3  -9   0   26.89    0.70
  -3  -9   0   27.04    0.74
   3  -9   0   26.87    0.69
   3  -9   0   27.59    0.74
   3  -9   0   26.98    0.66
   4  -9   0    2.88    0.19
  -4  -9   0    2.85    0.23
   4  -9   0    2.96    0.16
   4  -9   0    3.13    0.23
   5  -9   0    7.77    0.26
  -5  -9   0    7.65    0.35
   5  -9   0    8.08    0.31
   6  -9   0    2.46    0.16
  -6  -9   0    2.16    0.17
   0 -10   0    3.35    0.22
   1 -10   0    2.87    0.15
   1 -10   0    2.86    0.19
   2 -10   0   11.92    0.40
   2 -10   0   11.06    0.32
   2 -10   0   10.63    0.37
  -2 -10   0   11.49    0.42
   2 -10   0   10.57    0.35
   3 -10   0   13.83    0.42
   3 -10   0   13.56    0.38
  -3 -10   0   13.19    0.47
   3 -10   0   13.32    0.44
   3 -10   0   13.36    0.46
   4 -10   0    2.35    0.21
  -4 -10   0    2.23    0.21
   4 -10   0    2.47    0.15
   4 -10   0    2.41    0.18
   5 -10   0    1.48    0.15
   5 -10   0    1.47    0.12
  -5 -10   0    1.64    0.18
   6 -10   0    0.15    0.10
  -6 -10   0    0.24    0.12
   0 -11   0    0.03    0.11
   0 -11   0    0.02    0.13
   0 -11   0   -0.03    0.10
   1 -11   0    0.52    0.14
   1 -11   0    0.50    0.13
   1 -11   0    0.59    0.10
   2 -11   0    0.71    0.16
   2 -11   0    0.91    0.11
   2 -11   0    0.88    0.15
  -2 -11   0    0.77    0.18
   2 -11   0    0.88    0.15
  -3 -11   0   19.62    0.57
   3 -11   0   18.39    0.49
   3 -11   0   18.56    0.58
   3 -11   0   18.31    0.53
   4 -11   0    4.86    0.22
   4 -11   0    5.45    0.27
   4 -11   0    4.75    0.30
  -4 -11   0    5.20    0.28
   5 -11   0    0.84    0.11
  -5 -11   0    0.83    0.15
   5 -11   0    0.79    0.13
   0 -12   0    0.05    0.10
   0 -12   0   -0.04    0.13
   0 -12   0    0.06    0.13
   1 -12   0   15.37    0.42
   1 -12   0   15.26    0.47
   1 -12   0   15.42    0.49
   2 -12   0    0.46    0.10
   2 -12   0    0.37    0.14
   2 -12   0    0.60    0.16
   3 -12   0   19.78    0.55
   3 -12   0   19.45    0.51
  -3 -12   0   18.90    0.58
   3 -12   0   18.74    0.59
   4 -12   0    2.43    0.14
   4 -12   0    2.18    0.21
   4 -12   0    2.23    0.17
  -4 -12   0    2.25    0.20
  -5 -12   0    0.16    0.12
   5 -12   0    0.04    0.11
   5 -12   0   -0.02    0.08
   0 -13   0    0.02    0.15
   0 -13   0    0.04    0.10
   0 -13   0   -0.11    0.14
   1 -13   0    0.13    0.14
   1 -13   0    0.09    0.10
   1 -13   0    0.24    0.14
   2 -13   0    7.69    0.36
   2 -13   0    7.80    0.28
   2 -13   0    8.67    0.33
  -3 -13   0   -0.07    0.17
   3 -13   0    0.19    0.13
   3 -13   0   -0.01    0.14
   3 -13   0    0.12    0.10
  -4 -13   0    0.03    0.14
   4 -13   0    0.08    0.15
   4 -13   0   -0.01    0.11
   4 -13   0    0.05    0.08
  -5 -13   0   -0.04    0.11
   5 -13   0    0.06    0.09
   0 -14   0   37.78    0.89
   0 -14   0   37.32    0.93
   0 -14   0   37.14    1.01
   1 -14   0    1.57    0.18
   1 -14   0    1.71    0.13
   1 -14   0    1.64    0.19
   2 -14   0    1.18    0.12
   2 -14   0    1.12    0.16
   2 -14   0    1.10    0.18
   3 -14   0    0.31    0.15
   3 -14   0    0.55    0.13
   3 -14   0    0.34    0.09
   4 -14   0   12.42    0.32
   4 -14   0   12.19    0.35
  -4 -14   0   11.54    0.37
   0 -15   0    0.07    0.10
   1 -15   0    0.67    0.10
   1 -15   0    0.49    0.16
   1 -15   0    0.72    0.15
   2 -15   0   -0.01    0.09
   2 -15   0    0.11    0.14
   2 -15   0    0.03    0.13
   3 -15   0    0.06    0.08
   3 -15   0    0.02    0.11
   1 -16   0    3.05    0.18
   1 -16   0    2.49    0.13
   2 -16   0    0.09    0.08
   2 -16   0    0.00    0.12
   3 -16   0    4.05    0.15
   1 -17   0   14.89    0.38
   1   0  -1  860.45   19.30
   1   0   1  902.03   19.28
   2   0  -1    0.72    0.07
   2   0   1    0.77    0.06
   3   0  -1    0.56    0.08
   3   0   1    0.41    0.07
   4   0   1   -0.03    0.09
   4   0  -1   -0.06    0.08
   4   0  -1    0.10    0.10
   4   0   1    0.05    0.09
  -5   0  -1  120.97    2.76
  -5   0   1  117.32    2.75
   5   0   1  119.25    2.66
   5   0   1  118.19    2.69
   5   0  -1  119.84    2.67
  -6   0  -1   17.98    0.61
   6   0   1   17.85    0.52
   6   0  -1   17.33    0.48
  -6   0   1   18.93    0.60
  -7   0   1    0.88    0.16
  -7   0  -1    0.82    0.17
   1   1  -1   14.47    0.34
   1  -1   1   15.07    0.34
   1   1   1   15.47    0.34
   1  -1  -1   14.27    0.35
   2  -1   1   40.49    0.91
   2   1  -1   40.79    0.92
   2  -1  -1   39.68    0.92
   2   1   1   40.87    0.91
   3  -1   1   42.42    0.97
   3   1  -1   41.37    0.98
   3   1   1   42.85    0.96
   3  -1  -1   42.49    0.98
   4   1  -1    1.64    0.14
   4   1  -1    2.12    0.13
   4  -1   1    1.96    0.13
   4  -1   1    1.91    0.13
   4  -1  -1    2.12    0.13
   4  -1  -1    1.93    0.14
   5   1  -1   16.19    0.43
  -5  -1  -1   15.90    0.55
   5  -1   1   15.80    0.47
  -5   1   1   15.26    0.54
   5  -1  -1   15.67    0.42
  -5  -1   1   15.74    0.54
   5   1   1   15.66    0.47
   5   1   1   15.10    0.43
  -5   1  -1   16.32    0.56
   5  -1  -1   14.98    0.47
   5  -1  -1   14.53    0.59
  -6  -1  -1   13.64    0.51
   6  -1   1   13.56    0.43
   6   1  -1   12.94    0.39
  -6   1   1   12.90    0.50
   6  -1  -1   12.94    0.39
  -6  -1   1   13.66    0.50
   6   1   1   13.73    0.43
  -6   1  -1   14.91    0.53
   7  -1   1    0.50    0.13
  -7   1   1    0.46    0.15
  -7  -1  -1    0.60    0.16
  -7   1  -1    0.54    0.16
  -7  -1   1    0.55    0.15
   0  -2  -1    0.20    0.05
   0  -2   1    0.25    0.05
   1  -2   1   79.64    1.78
   1   2  -1   81.20    1.78
   1  -2  -1   80.47    1.78
   2   2  -1   10.80    0.28
   2  -2   1   11.26    0.28
   2   2   1   11.25    0.27
   2  -2  -1   10.55    0.29
   3   2  -1    2.54    0.14
   3  -2   1    2.68    0.14
   3   2   1    2.69    0.13
   3  -2  -1    2.76    0.15
   4  -2   1   21.18    0.54
   4  -2  -1   21.41    0.55
   4  -2  -1   20.69    0.52
  -5  -2  -1   76.53    1.80
   5   2  -1   75.85    1.72
  -5   2   1   75.51    1.81
   5  -2   1   76.71    1.75
   5  -2  -1   75.62    1.71
  -5   2  -1   76.78    1.82
   5  -2  -1   75.65    1.74
   5   2   1   75.30    1.72
   5  -2  -1   71.99    1.75
   5   2   1   74.22    1.74
   6   2  -1    4.86    0.23
   6  -2   1    4.79    0.26
  -6  -2  -1    4.99    0.30
  -6   2   1    4.51    0.30
   6  -2  -1    4.60    0.27
   6   2   1    4.40    0.23
  -6   2  -1    5.02    0.31
  -6  -2   1    4.78    0.29
   6   2   1    4.86    0.24
  -7   2   1    0.16    0.15
   7  -2   1    0.19    0.12
  -7  -2  -1    0.19    0.14
  -7   2  -1    0.09    0.15
  -7  -2   1    0.06    0.13
   0  -3   1  171.11    3.69
   0  -3  -1  165.42    3.68
   1  -3   1    7.96    0.21
   1   3  -1    8.40    0.20
   1  -3  -1    8.14    0.21
   2  -3   1   10.05    0.26
   2   3  -1    9.47    0.25
   2  -3  -1    9.93    0.27
   2   3   1    9.77    0.24
   3  -3   1   20.31    0.51
   3   3  -1   21.16    0.51
   3  -3  -1   20.97    0.52
   4  -3   1   19.09    0.50
   4  -3  -1   18.20    0.46
   4  -3  -1   17.99    0.50
   5   3  -1   10.16    0.32
   5  -3   1    9.70    0.36
   5  -3   1    9.77    0.39
  -5   3   1   10.27    0.45
  -5  -3  -1    9.78    0.43
   5   3   1   10.10    0.33
   5  -3  -1    9.40    0.39
   5  -3  -1    9.87    0.36
   5  -3  -1    9.77    0.31
   5   3   1    9.58    0.38
  -5   3  -1   10.48    0.46
  -5  -3   1    9.95    0.42
  -6  -3  -1   37.55    0.97
   6  -3   1   35.63    0.91
  -6   3   1   36.35    0.98
   6   3  -1   36.37    0.88
   6  -3  -1   36.29    0.90
   6   3   1   36.04    0.88
  -6   3  -1   36.75    0.99
  -6  -3   1   37.64    0.96
   7  -3   1    7.94    0.27
  -7   3   1    7.66    0.32
  -7  -3  -1    8.06    0.32
  -7   3  -1    8.18    0.34
  -7  -3   1    8.11    0.31
   0  -4   1   35.83    0.80
   0  -4  -1   35.15    0.79
   1  -4   1   51.89    1.15
   1   4  -1   50.90    1.14
   1  -4  -1   51.66    1.15
  -1  -4   1   51.21    1.14
   1   4   1   50.10    1.13
   2  -4   1   40.43    0.92
   2   4  -1   39.86    0.91
   2  -4  -1   40.27    0.93
   3  -4   1   92.30    2.04
   3  -4  -1   88.57    2.04
   4  -4   1    0.97    0.12
   4  -4  -1    1.25    0.11
   4  -4  -1    0.92    0.12
   5  -4   1    4.96    0.26
   5  -4   1    5.19    0.27
   5   4  -1    5.45    0.24
  -5   4   1    4.90    0.32
  -5  -4  -1    5.28    0.30
  -5  -4  -1    5.03    0.29
   5   4   1    5.32    0.26
   5  -4  -1    5.26    0.28
  -5   4  -1    5.05    0.34
   5  -4  -1    5.01    0.27
  -5  -4   1    5.42    0.34
  -5  -4   1    4.87    0.27
  -6  -4  -1    3.68    0.26
  -6   4   1    4.34    0.29
   6  -4   1    3.90    0.22
   6   4  -1    4.17    0.22
   6   4   1    4.02    0.20
   6  -4  -1    4.21    0.22
  -6  -4   1    3.87    0.25
  -6   4  -1    4.04    0.29
   7  -4   1    0.22    0.10
  -7  -4  -1    0.23    0.13
  -7   4   1    0.11    0.14
  -7  -4   1    0.18    0.12
  -7   4  -1    0.29    0.15
   0  -5   1   46.46    1.02
   0  -5  -1   44.46    1.01
  -1  -5  -1   23.99    0.53
   1  -5   1   23.60    0.55
  -1  -5   1   23.68    0.54
   1  -5  -1   23.31    0.55
   2  -5   1   12.61    0.32
   2   5  -1   11.99    0.31
   2  -5  -1   12.13    0.32
   3  -5   1   77.58    1.74
   3  -5   1   76.15    1.75
   3  -5  -1   75.36    1.75
   3  -5  -1   76.74    1.74
   4  -5   1    0.44    0.12
  -4  -5  -1    0.57    0.17
   4  -5   1    0.57    0.13
   4  -5  -1    0.31    0.13
  -4  -5   1    0.61    0.19
  -4  -5   1    0.34    0.16
   4  -5  -1    0.59    0.13
   5   5  -1    9.66    0.33
   5  -5   1    9.81    0.36
  -5  -5  -1   10.42    0.41
  -5   5   1    9.16    0.46
  -5  -5  -1    9.59    0.43
  -5   5  -1    8.93    0.46
  -5  -5   1    8.55    0.40
   5  -5  -1    9.75    0.36
  -5  -5   1    9.36    0.40
   6  -5   1   50.17    1.20
  -6  -5  -1   49.91    1.23
   6   5  -1   49.57    1.18
  -6   5   1   49.40    1.25
  -6  -5  -1   53.72    1.24
   6   5   1   50.77    1.19
  -6  -5   1   49.06    1.23
   6  -5  -1   51.65    1.20
  -6   5  -1   50.37    1.27
  -6  -5   1   51.26    1.24
   7  -5   1    5.99    0.23
  -7  -5  -1    5.86    0.26
  -7  -5   1    6.33    0.26
   7  -5  -1    5.59    0.33
  -7   5  -1    5.79    0.29
   0  -6  -1    1.14    0.07
   0  -6   1    1.14    0.07
   1  -6   1    2.26    0.11
  -1  -6   1    2.50    0.10
   1  -6  -1    2.21    0.11
   2  -6   1   18.31    0.46
   2  -6   1   17.84    0.51
   2  -6  -1   18.24    0.46
   3  -6   1   35.34    0.88
   3  -6   1   35.72    0.85
   3  -6  -1   35.08    0.87
   3  -6  -1   36.04    0.86
   4  -6   1    5.56    0.26
   4  -6   1    5.21    0.26
  -4  -6  -1    5.41    0.32
   4  -6   1    5.20    0.28
  -4  -6  -1    5.78    0.31
   4  -6   1    4.87    0.23
   4  -6  -1    5.30    0.26
   4  -6  -1    5.55    0.27
  -4  -6   1    5.55    0.32
  -4  -6   1    5.32    0.31
  -4   6  -1    5.74    0.35
  -5  -6  -1    5.85    0.31
   5  -6   1    5.54    0.28
  -5  -6  -1    5.51    0.30
  -5  -6   1    5.29    0.33
  -5   6  -1    5.72    0.35
   5  -6  -1    5.44    0.28
  -5  -6   1    5.42    0.29
   6  -6   1    0.51    0.13
   6   6  -1    0.36    0.12
  -6  -6  -1    0.43    0.17
  -6  -6  -1    0.58    0.17
  -6   6  -1    0.57    0.20
   6  -6  -1    0.52    0.13
  -6  -6   1    0.31    0.15
   6   6   1    0.57    0.12
  -6  -6   1    0.54    0.16
   7  -6   1    1.32    0.12
  -7  -6  -1    1.16    0.13
  -7  -6   1    1.17    0.13
   0  -7   1   11.10    0.28
   1  -7   1    4.70    0.16
   1  -7  -1    4.24    0.16
  -1  -7   1    4.49    0.15
   2  -7   1   16.84    0.43
   2  -7   1   16.53    0.46
   2  -7  -1   16.58    0.46
   2  -7  -1   16.81    0.43
   3  -7   1    3.31    0.19
   3  -7   1    3.07    0.19
   3  -7  -1    3.01    0.18
   3  -7  -1    2.96    0.19
   4  -7   1    8.18    0.33
   4  -7   1    8.87    0.33
  -4  -7  -1    8.70    0.38
   4  -7   1    9.06    0.35
   4  -7   1    8.94    0.29
   4  -7  -1    8.52    0.36
  -4   7  -1    9.27    0.54
   4  -7  -1    8.54    0.34
  -4  -7   1    8.95    0.37
   4  -7  -1    8.16    0.29
  -4  -7   1    8.39    0.37
   4  -7  -1    8.55    0.33
  -5  -7  -1    7.80    0.39
  -5  -7  -1    7.93    0.39
   5  -7   1    8.13    0.32
  -5   7  -1    7.85    0.46
  -5  -7   1    8.43    0.38
   5  -7  -1    7.85    0.31
  -5  -7   1    7.52    0.36
   6  -7   1    2.07    0.16
   6   7  -1    2.40    0.16
  -6  -7  -1    2.29    0.20
  -6  -7  -1    1.86    0.20
  -6  -7   1    2.71    0.20
  -6   7  -1    2.08    0.23
  -6  -7   1    2.04    0.18
   6   7   1    2.30    0.16
   6  -7  -1    2.02    0.17
   0  -8   1    8.97    0.32
   0  -8   1    8.66    0.24
   0  -8  -1    8.57    0.29
   0  -8  -1    8.04    0.23
   1  -8   1    8.36    0.29
   1   8  -1    8.07    0.24
   1  -8   1    8.60    0.25
   1  -8  -1    8.22    0.25
   1  -8  -1    8.20    0.29
   2  -8   1   15.25    0.41
   2  -8   1   14.46    0.44
   2  -8  -1   15.24    0.44
   2  -8  -1   14.78    0.41
   3  -8   1    2.24    0.17
   3  -8   1    1.50    0.16
  -3  -8  -1    2.30    0.21
   3  -8   1    1.77    0.15
   3  -8   1    1.99    0.13
  -3  -8   1    2.38    0.20
   3  -8  -1    1.90    0.15
   3  -8  -1    2.18    0.14
   3  -8  -1    2.19    0.16
   3  -8  -1    1.73    0.17
   4  -8   1    2.58    0.18
   4  -8   1    2.51    0.21
   4  -8   1    2.57    0.15
  -4  -8  -1    2.82    0.23
  -4  -8   1    3.09    0.23
  -4  -8   1    2.87    0.22
   4  -8  -1    2.89    0.22
   4  -8  -1    2.67    0.19
   4  -8  -1    2.72    0.16
   5  -8   1    0.14    0.11
   5  -8   1    0.28    0.13
  -5  -8  -1    0.30    0.17
   5  -8  -1    0.31    0.13
  -5  -8   1    0.27    0.17
  -5  -8   1    0.13    0.16
   6  -8   1    0.77    0.13
  -6  -8  -1    0.77    0.16
   6   8  -1    0.75    0.12
  -6  -8   1    0.65    0.16
  -6  -8   1    0.79    0.15
   6   8   1    0.93    0.13
   6  -8  -1    0.70    0.13
   0  -9   1    3.20    0.20
   0  -9  -1    3.49    0.20
   0  -9   1    3.59    0.16
   0  -9  -1    3.49    0.17
   1  -9   1    7.61    0.24
   1  -9   1    7.45    0.28
   1  -9  -1    7.15    0.24
   1  -9  -1    7.96    0.29
   1  -9  -1    7.45    0.24
   2  -9   1   23.65    0.64
   2  -9   1   23.07    0.59
   2  -9  -1   22.79    0.59
   2  -9  -1   23.81    0.64
   3  -9   1   17.43    0.48
   3  -9   1   16.66    0.52
   3  -9   1   17.47    0.45
  -3  -9  -1   17.16    0.53
   3  -9   1   16.96    0.48
   3  -9  -1   16.16    0.45
   3  -9  -1   17.41    0.49
   3  -9  -1   16.45    0.48
   3  -9  -1   17.29    0.52
  -3  -9   1   17.22    0.53
   4  -9   1    8.94    0.29
   4  -9   1    8.22    0.33
   4  -9   1    9.03    0.38
  -4  -9  -1    8.98    0.40
  -4  -9   1    8.70    0.37
   4  -9  -1    8.35    0.33
   4  -9  -1    8.02    0.29
   4  -9  -1    8.84    0.37
   5  -9   1    0.73    0.14
   5  -9   1    0.58    0.11
  -5  -9  -1    0.69    0.17
   5  -9  -1    0.73    0.14
  -5  -9   1    0.64    0.18
  -5  -9   1    0.60    0.16
   6  -9   1    7.53    0.26
  -6  -9  -1    7.70    0.30
   6  -9  -1    7.92    0.27
  -6  -9   1    7.39    0.29
   0 -10   1    4.61    0.24
   0 -10  -1    4.91    0.24
   0 -10  -1    4.07    0.19
   1 -10   1    0.51    0.12
   1 -10   1    0.38    0.10
   1 -10  -1    0.54    0.12
   1 -10  -1    0.44    0.11
  -2 -10  -1   12.17    0.44
   2 -10   1   11.88    0.34
   2 -10   1   10.95    0.36
   2 -10   1   11.91    0.41
   2 -10   1   12.34    0.39
  -2 -10  -1   11.95    0.43
   2 -10  -1   11.95    0.37
   2 -10  -1   12.03    0.41
   2 -10  -1   11.68    0.34
   2 -10  -1   12.80    0.39
  -2 -10   1   11.97    0.42
   3 -10   1   24.22    0.64
   3 -10   1   24.94    0.69
   3 -10   1   24.26    0.61
  -3 -10  -1   24.60    0.69
   3 -10  -1   26.78    0.80
   3 -10  -1   24.93    0.69
   3 -10  -1   23.43    0.64
  -3 -10   1   23.89    0.67
   3 -10  -1   23.18    0.61
   4 -10   1    2.48    0.22
   4 -10   1    2.65    0.16
  -4 -10  -1    2.46    0.22
   4 -10   1    2.62    0.19
   4 -10  -1    2.75    0.19
  -4 -10   1    2.71    0.22
   4 -10  -1    2.35    0.22
   4 -10  -1    2.57    0.15
   5 -10   1    2.85    0.18
  -5 -10  -1    3.02    0.21
   5 -10   1    2.89    0.15
  -5 -10   1    2.58    0.20
   5 -10  -1    2.62    0.15
   5 -10  -1    2.65    0.18
  -6 -10  -1    2.76    0.17
   6 -10   1    2.78    0.15
  -6 -10   1    2.61    0.16
   6 -10  -1    2.68    0.15
   0 -11   1   29.69    0.85
   0 -11  -1   27.60    0.68
   0 -11   1   28.17    0.74
   0 -11  -1   27.96    0.74
   0 -11   1   27.31    0.68
   0 -11  -1   27.95    0.72
   1 -11   1    7.09    0.28
   1 -11   1    6.92    0.25
   1 -11   1    7.02    0.30
  -1 -11  -1    7.69    0.32
   1 -11   1    8.46    0.33
   1 -11  -1    7.59    0.25
   1 -11  -1    7.36    0.32
   1 -11  -1    7.38    0.31
  -2 -11  -1    3.86    0.26
  -2 -11  -1    4.49    0.29
   2 -11   1    4.63    0.25
   2 -11   1    4.10    0.21
   2 -11   1    4.62    0.26
   2 -11   1    4.89    0.28
   2 -11  -1    3.58    0.22
  -2 -11   1    4.37    0.26
   2 -11  -1    4.71    0.21
   2 -11  -1    4.68    0.28
   2 -11  -1    4.52    0.26
   3 -11   1    5.08    0.30
   3 -11   1    4.77    0.22
  -3 -11  -1    4.43    0.27
   3 -11   1    4.83    0.26
   3 -11  -1    5.06    0.22
   3 -11  -1    4.82    0.30
   3 -11  -1    4.72    0.27
  -3 -11   1    5.07    0.28
   4 -11   1    2.68    0.22
   4 -11   1    2.50    0.19
  -4 -11  -1    2.23    0.21
   4 -11   1    2.57    0.15
   4 -11  -1    2.80    0.16
  -4 -11   1    2.50    0.21
   4 -11  -1    2.69    0.22
   4 -11  -1    2.53    0.19
   5  11  -1    0.60    0.12
   5 -11   1    0.32    0.12
  -5 -11  -1    0.28    0.14
   5 -11   1    0.33    0.09
   5 -11  -1    0.47    0.10
  -5 -11   1    0.33    0.13
   5 -11  -1    0.44    0.12
   0 -12  -1    0.03    0.13
   0 -12   1    0.00    0.13
   0 -12  -1   -0.01    0.13
   0 -12  -1    0.13    0.10
   0 -12   1    0.12    0.10
   1 -12   1    5.30    0.22
   1 -12   1    5.44    0.30
  -1 -12  -1    5.18    0.27
   1 -12   1    4.98    0.28
   1 -12  -1    5.59    0.23
   1 -12  -1    5.49    0.28
   1 -12  -1    5.66    0.29
   2 -12   1   16.46    0.54
   2 -12   1   16.70    0.45
   2 -12   1   17.05    0.50
   2 -12  -1   17.41    0.50
   2 -12  -1   16.69    0.54
   2 -12  -1   16.78    0.45
   3 -12   1    5.19    0.31
   3 -12   1    5.59    0.23
  -3 -12  -1    5.64    0.29
   3 -12   1    5.54    0.28
   3 -12  -1    5.46    0.28
  -3 -12   1    5.59    0.29
   3 -12  -1    5.16    0.23
   3 -12  -1    5.05    0.31
   4 -12   1    8.23    0.27
  -4 -12  -1    8.11    0.35
   4 -12   1    7.87    0.35
   4 -12   1    8.09    0.31
   4 -12  -1    8.45    0.31
   4 -12  -1    8.36    0.27
  -4 -12   1    7.98    0.34
   4 -12  -1    7.77    0.35
  -5 -12  -1    2.58    0.17
   5 -12   1    2.43    0.15
   5 -12   1    2.55    0.13
   5 -12  -1    2.66    0.16
   5 -12  -1    2.50    0.13
  -5 -12   1    2.70    0.17
   0 -13  -1    2.55    0.21
   0 -13   1    2.54    0.21
   0 -13   1    2.53    0.16
   0 -13  -1    2.46    0.15
   0 -13  -1    2.53    0.20
  -1 -13  -1    9.66    0.38
   1 -13   1    9.75    0.37
   1 -13   1   10.20    0.39
   1 -13   1    9.66    0.31
   1 -13  -1    9.78    0.39
   1 -13  -1    9.59    0.36
   1 -13  -1    9.63    0.31
   2 -13   1    4.86    0.27
   2 -13   1    5.04    0.30
   2 -13   1    5.42    0.23
   2 -13  -1    5.29    0.23
   2 -13  -1    5.32    0.28
   2 -13  -1    5.42    0.30
   3 -13   1    0.61    0.16
  -3 -13  -1    0.58    0.18
   3 -13   1    0.80    0.14
   3 -13   1    0.78    0.11
   3 -13  -1    0.61    0.11
   3 -13  -1    0.71    0.15
   3 -13  -1    0.75    0.17
  -3 -13   1    0.75    0.17
   4 -13   1    3.93    0.22
   4 -13   1    3.83    0.18
  -4 -13  -1    3.54    0.22
   4 -13   1    3.44    0.22
   4 -13  -1    3.89    0.22
   4 -13  -1    3.33    0.22
   4 -13  -1    4.07    0.18
  -4 -13   1    3.92    0.21
  -5 -13  -1    2.46    0.16
   5 -13   1    2.51    0.13
   5 -13   1    2.85    0.15
   5 -13  -1    2.59    0.14
  -5 -13   1    2.50    0.15
   0 -14  -1   15.29    0.50
   0 -14   1   15.14    0.46
   0 -14  -1   15.57    0.42
   0 -14  -1   15.51    0.47
  -1 -14  -1   21.51    0.61
   1 -14   1   21.59    0.55
   1 -14   1   21.59    0.63
   1 -14   1   21.65    0.60
   1 -14  -1   22.23    0.56
   1 -14  -1   22.40    0.63
   1 -14  -1   21.82    0.60
   2 -14   1    2.38    0.21
   2 -14   1    2.52    0.15
   2 -14   1    2.43    0.19
   2 -14  -1    2.66    0.22
   2 -14  -1    2.65    0.19
   2 -14  -1    2.51    0.15
   3 -14   1    1.86    0.12
   3 -14   1    1.88    0.19
   3 -14   1    2.22    0.17
   3 -14  -1    1.98    0.19
   3 -14  -1    1.98    0.13
   3 -14  -1    2.02    0.17
   4 -14   1    3.30    0.20
  -4 -14  -1    3.83    0.20
   4 -14   1    3.59    0.16
  -4 -14   1    3.44    0.19
   4 -14  -1    3.68    0.20
   4 -14  -1    3.63    0.16
   0 -15  -1    0.06    0.10
   0 -15  -1    0.09    0.14
   1 -15   1    1.03    0.16
   1 -15   1    0.96    0.11
   1 -15   1    1.01    0.17
   1 -15  -1    1.04    0.11
   1 -15  -1    1.07    0.15
   1 -15  -1    0.83    0.17
   2 -15   1    7.47    0.31
   2 -15   1    7.64    0.25
   2 -15   1    7.67    0.33
   2 -15  -1    7.96    0.25
   2 -15  -1    8.30    0.30
   2 -15  -1    7.21    0.32
   3 -15   1    2.49    0.17
   3 -15   1    2.79    0.15
   3 -15  -1    2.72    0.17
   3 -15  -1    2.94    0.15
   0 -16  -1   11.50    0.32
   0 -16  -1   10.80    0.37
   1 -16   1    8.44    0.26
   1 -16  -1    8.78    0.26
   1 -16  -1    7.72    0.30
   2 -16   1   10.52    0.29
   2 -16   1   10.99    0.34
   2 -16  -1   10.12    0.33
   2 -16  -1   10.83    0.29
   3 -16   1    1.19    0.09
   3 -16  -1    1.19    0.12
   3 -16  -1    1.26    0.09
   1 -17  -1    0.61    0.08
   0   0  -2  396.40    8.68
   1   0   2   27.35    0.61
   1   0  -2   27.02    0.62
   2   0   2    3.37    0.11
   2   0  -2    3.07    0.13
   3   0  -2   87.29    1.95
   3   0   2   85.62    1.92
   4   0  -2   14.75    0.42
   4   0  -2   14.43    0.39
   4   0   2   14.36    0.40
   5   0   2   39.75    0.99
   5   0  -2   40.56    0.96
  -5   0  -2   40.57    1.07
  -5   0   2   40.74    1.05
   6   0  -2    7.57    0.28
  -6   0  -2    8.84    0.43
  -6   0   2    7.79    0.39
   6   0   2    8.01    0.32
  -7   0   2    0.07    0.13
  -7   0  -2   -0.03    0.14
   7   0   2    0.18    0.12
   0  -1   2   19.62    0.43
   0  -1  -2   18.84    0.43
   1  -1   2   31.72    0.70
   1   1  -2   31.46    0.71
   1  -1  -2   30.63    0.71
   2  -1   2    7.04    0.19
   2   1  -2    6.85    0.20
   2  -1  -2    6.87    0.21
   2   1   2    7.14    0.18
   3   1  -2   24.52    0.59
   3  -1   2   23.99    0.57
   3   1   2   23.85    0.57
   3  -1  -2   24.34    0.59
   4  -1   2    6.26    0.23
   4   1  -2    5.63    0.22
   4   1  -2    6.45    0.26
   4  -1  -2    6.23    0.25
   4  -1  -2    6.08    0.22
   5   1  -2    3.21    0.18
   5  -1   2    2.89    0.20
  -5  -1  -2    3.31    0.28
  -5   1   2    2.46    0.24
   5   1   2    3.08    0.18
   5   1   2    3.36    0.21
   5  -1  -2    3.02    0.22
  -5  -1   2    3.16    0.25
  -5   1  -2    3.36    0.28
   5  -1  -2    3.32    0.17
  -6   1   2    5.31    0.31
   6  -1   2    5.96    0.29
   6   1  -2    6.04    0.25
  -6  -1  -2    5.95    0.33
  -6   1  -2    5.40    0.34
   6  -1  -2    5.43    0.24
   6   1   2    5.42    0.29
  -6  -1   2    6.12    0.36
  -7   1   2    0.51    0.15
  -7  -1  -2    0.60    0.16
   7  -1   2    0.50    0.12
  -7   1  -2    0.49    0.16
  -7  -1   2    0.39    0.14
   7   1   2    0.56    0.13
   0  -2   2  202.74    4.29
   0  -2  -2  187.69    4.27
   1   2  -2  188.34    4.15
   1  -2   2  190.53    4.15
   1  -2  -2  188.67    4.15
   2   2  -2   38.29    0.89
   2  -2   2   39.73    0.89
   2  -2  -2   38.23    0.90
   2   2   2   39.96    0.87
   3  -2   2   33.41    0.79
   3   2  -2   33.39    0.80
   3  -2  -2   34.68    0.81
   4  -2   2   26.32    0.63
   4   2  -2   25.07    0.62
   4   2  -2   25.26    0.64
   4  -2  -2   24.21    0.61
   4  -2  -2   24.94    0.65
  -5   2   2    4.20    0.28
   5   2  -2    4.46    0.21
   5  -2   2    3.93    0.23
   5   2   2    4.57    0.24
  -5  -2   2    4.53    0.28
   5  -2  -2    4.05    0.21
  -5   2  -2    4.12    0.31
   5  -2  -2    4.00    0.25
   5   2   2    4.26    0.23
   6   2  -2    8.62    0.29
   6  -2   2    8.05    0.33
  -6   2   2    8.03    0.41
  -6  -2  -2    8.90    0.42
  -6   2  -2    8.11    0.44
  -6  -2   2    9.22    0.40
   6   2   2    8.10    0.33
   6  -2  -2    8.20    0.29
  -7  -2  -2    0.10    0.14
  -7   2   2    0.12    0.14
   7  -2   2    0.16    0.11
  -7   2  -2    0.26    0.16
  -7  -2   2    0.26    0.13
   0  -3  -2   35.26    0.79
   1   3  -2  581.03   12.92
   1  -3   2  594.51   12.91
   1  -3  -2  589.36   12.90
   2  -3   2   36.73    0.83
   2   3  -2   35.17    0.83
   2  -3  -2   37.32    0.84
   3  -3   2   17.63    0.44
   3   3  -2   17.17    0.44
   3  -3  -2   16.73    0.45
   4  -3   2   14.10    0.40
   4  -3  -2   13.73    0.37
   4  -3  -2   13.60    0.41
  -5  -3  -2   12.06    0.49
  -5   3   2   12.14    0.49
  -5  -3  -2   11.84    0.49
   5   3  -2   12.19    0.37
   5  -3   2   11.84    0.40
  -5   3  -2   11.85    0.51
   5  -3  -2   11.45    0.40
   5   3   2   12.01    0.41
   5  -3  -2   11.89    0.42
   5  -3  -2   11.48    0.34
  -5  -3   2   11.48    0.45
   5   3   2   11.88    0.36
  -6  -3  -2    3.91    0.27
  -6   3   2    3.67    0.27
   6   3  -2    3.96    0.20
   6  -3   2    4.41    0.25
   6   3   2    3.85    0.20
  -6   3  -2    3.46    0.28
  -6  -3   2    4.09    0.26
   6   3   2    3.96    0.22
   7  -3   2    1.42    0.13
  -7  -3  -2    1.42    0.16
  -7   3   2    1.65    0.17
  -7   3  -2    1.47    0.18
  -7  -3   2    1.18    0.15
   0  -4   2  853.71   18.48
   0  -4  -2  831.92   18.43
   1   4  -2   13.08    0.32
   1  -4   2   13.39    0.32
  -1  -4   2   13.29    0.32
   1  -4  -2   12.89    0.32
   2  -4   2   76.83    1.73
   2   4  -2   76.80    1.73
   2  -4  -2   79.13    1.74
   3  -4   2   94.91    2.11
   3   4  -2   93.99    2.11
   3  -4  -2   94.95    2.12
   3  -4  -2   92.44    2.09
   4  -4   2    4.94    0.23
  -4  -4  -2    5.10    0.27
   4  -4  -2    5.33    0.25
  -4  -4   2    5.00    0.29
   4  -4  -2    5.07    0.20
  -5  -4  -2   14.28    0.51
   5   4  -2   15.16    0.43
  -5   4   2   14.54    0.55
   5  -4   2   14.50    0.45
  -5  -4  -2   14.46    0.52
   5  -4  -2   15.22    0.46
  -5  -4   2   14.25    0.49
  -5  -4   2   14.47    0.50
  -5   4  -2   14.80    0.56
   5  -4  -2   14.74    0.40
   5   4   2   14.91    0.47
  -6  -4  -2    1.31    0.21
  -6   4   2    1.45    0.22
   6  -4   2    1.52    0.16
   6   4  -2    1.36    0.14
   6  -4  -2    1.71    0.17
   6   4   2    1.38    0.15
  -6   4  -2    1.59    0.23
  -6  -4   2    1.41    0.19
   6   4   2    1.14    0.17
  -7  -4  -2    1.44    0.16
   7  -4   2    1.63    0.13
  -7   4   2    1.37    0.16
  -7   4  -2    1.26    0.17
  -7  -4   2    1.41    0.15
   0  -5  -2   82.94    1.86
   0  -5   2   85.28    1.86
   1  -5   2  100.58    2.18
   1   5  -2   97.55    2.18
  -1  -5   2   97.83    2.18
   1  -5  -2   97.63    2.18
   2   5  -2   84.61    1.89
   2  -5   2   83.65    1.89
   2  -5  -2   84.99    1.90
   3  -5   2   43.59    1.04
   3  -5   2   43.56    1.01
   3  -5  -2   42.57    0.99
   3  -5  -2   42.37    1.03
   3  -5  -2   44.63    1.03
   4  -5   2   11.90    0.37
   4  -5   2   11.09    0.36
  -4  -5  -2   11.69    0.43
  -4  -5   2   11.28    0.42
   4  -5  -2   11.25    0.32
  -4   5  -2   10.80    0.48
  -4  -5   2   11.56    0.41
   4  -5  -2   11.74    0.38
   4  -5  -2   10.66    0.37
   5   5  -2   17.97    0.50
  -5  -5  -2   18.32    0.58
  -5  -5  -2   19.31    0.60
   5  -5   2   18.91    0.53
  -5   5  -2   17.99    0.63
   5  -5  -2   18.59    0.53
  -5  -5   2   18.22    0.57
  -5  -5   2   17.98    0.56
   5   5   2   18.00    0.54
  -6  -5  -2    3.51    0.24
  -6  -5  -2    3.32    0.24
   6  -5   2    3.17    0.20
   6   5  -2    2.92    0.18
   6  -5  -2    3.12    0.20
  -6   5  -2    3.00    0.26
  -6  -5   2    3.59    0.23
   6   5   2    3.34    0.19
  -7  -5  -2    6.43    0.27
   7  -5   2    6.45    0.24
  -7  -5   2    7.08    0.26
  -7   5  -2    6.54    0.30
   0  -6   2   17.79    0.42
   0  -6  -2   17.13    0.41
   1  -6   2    7.72    0.22
   1   6  -2    7.94    0.22
  -1  -6   2    7.89    0.21
   1  -6  -2    7.57    0.22
   2   6  -2    3.73    0.16
   2  -6   2    3.66    0.19
   2  -6   2    3.58    0.15
   2  -6  -2    3.85    0.17
   2  -6  -2    3.37    0.19
   3  -6   2    2.43    0.17
   3  -6   2    2.62    0.15
   3  -6  -2    2.32    0.16
   3  -6  -2    2.92    0.17
   3  -6  -2    2.55    0.12
  -4  -6  -2   12.40    0.45
   4  -6   2   12.80    0.43
   4  -6   2   13.10    0.41
   4  -6   2   13.53    0.37
   4  -6   2   13.36    0.41
  -4  -6  -2   13.44    0.46
  -4  -6   2   13.66    0.45
  -4   6  -2   13.23    0.54
   4  -6  -2   13.36    0.42
   4  -6  -2   12.09    0.37
   4  -6  -2   13.14    0.41
  -4  -6   2   13.31    0.44
  -5  -6  -2    4.96    0.29
   5  -6   2    5.13    0.28
  -5  -6  -2    4.55    0.29
   5  -6   2    4.72    0.30
   5   6  -2    4.69    0.24
  -5  -6   2    5.09    0.28
  -5   6  -2    4.64    0.33
   5  -6  -2    4.86    0.27
  -5  -6   2    4.44    0.26
   5   6   2    5.31    0.26
   6   6  -2    1.27    0.14
  -6  -6  -2    1.60    0.20
   6  -6   2    1.64    0.16
  -6  -6  -2    1.64    0.20
  -6   6  -2    1.28    0.21
   6  -6  -2    1.65    0.16
  -6  -6   2    1.43    0.18
  -6  -6   2    1.69    0.18
   6   6   2    1.63    0.15
   7  -6   2    0.49    0.10
  -7   6  -2    0.50    0.14
  -7  -6   2    0.41    0.11
   0  -7   2   32.47    0.74
   0  -7  -2   31.47    0.73
   1  -7   2   25.76    0.62
   1   7  -2   26.23    0.62
   1  -7   2   27.30    0.71
   1  -7  -2   25.59    0.61
  -1  -7   2   25.53    0.61
   1  -7  -2   25.28    0.65
   2  -7   2    0.33    0.08
   2  -7   2    0.28    0.09
   2  -7  -2    0.10    0.08
   2  -7  -2    0.28    0.10
   2  -7  -2    0.18    0.07
   3  -7   2    4.03    0.20
  -3  -7  -2    3.77    0.23
   3  -7   2    3.45    0.22
   3  -7  -2    3.20    0.17
   3  -7  -2    3.41    0.23
  -3  -7   2    3.72    0.22
   3  -7  -2    3.57    0.21
   4  -7   2    1.14    0.12
  -4  -7  -2    1.01    0.20
   4  -7   2    0.91    0.15
   4  -7   2    1.10    0.16
  -4  -7  -2    1.51    0.20
   4  -7   2    1.16    0.15
  -4  -7   2    1.28    0.18
   4  -7  -2    0.98    0.16
   4  -7  -2    1.19    0.15
  -4  -7   2    1.53    0.18
  -4   7  -2    1.39    0.25
   5   7  -2   -0.03    0.12
   5  -7   2    0.09    0.10
   5  -7   2    0.06    0.13
  -5  -7  -2    0.00    0.17
   5   7   2    0.04    0.17
   5  -7  -2   -0.03    0.13
  -5  -7   2    0.07    0.15
  -5   7  -2    0.06    0.21
  -5  -7   2   -0.05    0.16
   6   7  -2    5.61    0.24
   6  -7   2    5.95    0.25
  -6  -7  -2    5.79    0.31
  -6  -7   2    6.08    0.29
  -6  -7   2    5.94    0.28
   6   7   2    5.28    0.24
   6  -7  -2    5.61    0.26
  -6   7  -2    5.67    0.35
   0  -8  -2   36.29    0.84
   0  -8  -2   36.82    0.88
   0  -8   2   35.49    0.87
   0  -8   2   36.66    0.84
   1  -8   2   45.12    1.08
   1  -8   2   44.81    1.04
  -1  -8  -2   44.67    1.04
  -1  -8  -2   46.92    1.08
   1   8  -2   45.28    1.04
   1  -8  -2   44.12    1.03
  -1  -8   2   46.07    1.04
   1  -8  -2   45.61    1.08
   1  -8  -2   44.05    1.04
   2  -8   2   16.35    0.43
   2  -8   2   16.46    0.47
   2  -8  -2   15.98    0.43
   2  -8  -2   16.75    0.47
   2  -8  -2   15.67    0.41
   3  -8   2   39.03    0.94
  -3  -8  -2   40.62    1.01
   3  -8   2   40.75    1.01
   3  -8   2   39.83    0.97
   3  -8   2   41.30    0.97
  -3  -8  -2   39.42    1.00
  -3  -8   2   39.63    1.03
   3  -8  -2   40.63    0.97
   3  -8  -2   40.72    1.00
  -3  -8   2   40.79    1.00
   3  -8  -2   39.10    0.94
   3  -8  -2   39.98    0.97
   4  -8   2    7.63    0.31
   4  -8   2    7.65    0.26
  -4  -8  -2    6.97    0.37
  -4  -8  -2    6.70    0.36
   4  -8   2    7.31    0.34
  -4   8  -2    7.20    0.39
   4  -8  -2    6.82    0.26
   4  -8  -2    6.82    0.34
  -4  -8   2    7.42    0.34
  -4  -8   2    8.04    0.35
   4  -8  -2    7.52    0.31
   5  -8   2    3.73    0.19
   5   8  -2    3.35    0.19
  -5  -8  -2    2.91    0.24
   5  -8   2    2.92    0.19
  -5  -8   2    2.94    0.22
  -5   8  -2    2.77    0.28
  -5  -8   2    2.92    0.22
   5  -8  -2    2.84    0.20
   6   8  -2    6.84    0.25
  -6  -8  -2    6.73    0.30
   6  -8   2    6.79    0.26
  -6  -8   2    6.63    0.30
   6   8   2    6.44    0.25
   6  -8  -2    6.77    0.27
  -6  -8   2    6.68    0.29
   0  -9  -2    0.88    0.10
   0  -9   2    0.77    0.09
   0  -9   2    0.79    0.12
   0  -9  -2    0.73    0.12
  -1  -9  -2    0.78    0.13
   1  -9   2    0.65    0.09
   1  -9   2    0.62    0.11
   1  -9  -2    0.59    0.09
   1  -9  -2    0.74    0.09
   1  -9  -2    0.65    0.12
  -2  -9  -2   16.50    0.53
   2  -9   2   16.98    0.45
   2  -9   2   17.03    0.50
   2  -9  -2   16.96    0.46
   2  -9  -2   17.59    0.51
  -2  -9   2   16.22    0.50
   2  -9  -2   16.19    0.43
   3  -9   2    2.54    0.18
   3  -9   2    2.82    0.18
  -3  -9  -2    3.12    0.24
  -3  -9  -2    2.76    0.23
   3  -9   2    2.87    0.22
   3  -9   2    2.59    0.15
   3  -9  -2    2.49    0.18
   3  -9  -2    2.65    0.19
   3  -9  -2    2.24    0.20
  -3  -9   2    2.98    0.28
   3  -9  -2    2.97    0.16
  -3  -9   2    2.71    0.21
   4  -9   2   13.39    0.42
  -4  -9  -2   13.34    0.53
  -4  -9  -2   13.48    0.48
   4  -9   2   12.79    0.38
   4  -9   2   12.52    0.46
   4  -9  -2   12.92    0.46
   4  -9  -2   12.87    0.38
  -4  -9   2   13.44    0.46
   4  -9  -2   13.04    0.42
  -4  -9   2   13.30    0.46
   5  -9   2    4.62    0.25
   5  -9   2    5.06    0.21
   5   9  -2    4.99    0.24
  -5  -9  -2    4.69    0.27
  -5  -9   2    4.81    0.26
   5  -9  -2    5.13    0.25
  -5  -9   2    4.95    0.31
   6  -9   2    1.15    0.12
  -6  -9  -2    1.23    0.15
   6  -9  -2    1.47    0.14
  -6  -9   2    1.08    0.14
  -6  -9   2    1.11    0.16
   0 -10   2   14.69    0.41
   0 -10   2   15.25    0.45
   0 -10  -2   16.02    0.46
   0 -10  -2   15.04    0.41
   1 -10   2    8.20    0.31
   1 -10   2    7.98    0.27
   1 -10  -2    8.14    0.27
   1 -10  -2    7.90    0.31
   1 -10  -2    8.11    0.32
   1 -10  -2    7.85    0.26
   2 -10   2    3.52    0.18
   2 -10   2    3.80    0.21
  -2 -10  -2    3.64    0.25
   2 -10   2    3.13    0.18
  -2 -10  -2    3.45    0.23
   2 -10   2    3.45    0.22
  -2 -10   2    3.52    0.23
   2 -10  -2    3.33    0.22
   2 -10  -2    3.27    0.16
   2 -10  -2    3.03    0.19
   2 -10  -2    3.68    0.20
   3 -10   2    6.26    0.32
   3 -10   2    6.32    0.24
   3 -10   2    6.23    0.29
  -3 -10  -2    6.21    0.36
  -3 -10  -2    6.16    0.35
   3 -10  -2    5.99    0.31
   3 -10  -2    6.27    0.29
   3 -10  -2    5.94    0.24
  -3 -10   2    6.19    0.33
  -4 -10  -2   11.10    0.44
   4 -10   2   11.75    0.34
   4 -10   2   11.02    0.38
   4 -10   2   10.62    0.42
  -4 -10   2   11.62    0.42
   4 -10  -2   10.98    0.42
   4 -10  -2   11.32    0.38
   4 -10  -2   11.03    0.34
   5  10  -2    1.75    0.15
   5 -10   2    1.73    0.16
   5 -10   2    1.72    0.13
  -5 -10  -2    1.70    0.19
  -5 -10   2    1.77    0.20
   5 -10  -2    1.71    0.16
  -5 -10   2    1.65    0.17
   6 -10   2    0.07    0.10
  -6 -10  -2    0.16    0.12
   6 -10  -2    0.08    0.10
  -6 -10   2    0.05    0.11
   0 -11  -2    2.12    0.18
   0 -11  -2    2.19    0.15
   0 -11  -2    1.86    0.14
   0 -11   2    1.81    0.17
   0 -11  -2    1.85    0.18
   1 -11   2   12.10    0.35
  -1 -11  -2   12.22    0.40
  -1 -11  -2   12.45    0.36
   1 -11   2   12.50    0.42
   1 -11   2   11.87    0.37
   1 -11   2   12.29    0.40
   1 -11  -2   12.47    0.40
   1 -11  -2   12.11    0.36
   1 -11  -2   12.91    0.43
   1 -11  -2   12.30    0.35
   2 -11   2   34.62    0.86
  -2 -11  -2   33.24    0.91
  -2 -11  -2   34.26    0.88
   2 -11   2   36.42    0.91
   2 -11   2   34.18    0.83
   2 -11   2   33.32    0.85
   2 -11  -2   34.79    0.87
   2 -11  -2   35.20    0.83
  -2 -11   2   33.43    0.88
   2 -11  -2   35.00    0.91
  -3 -11  -2    0.31    0.18
   3 -11   2    0.14    0.10
   3 -11   2    0.13    0.13
  -3 -11  -2    0.06    0.18
   3 -11   2    0.07    0.15
   3 -11  -2    0.12    0.10
   3 -11  -2   -0.04    0.13
  -3 -11   2    0.13    0.15
   3 -11  -2    0.16    0.15
   4 -11   2    2.37    0.18
   4 -11   2    2.32    0.21
  -4 -11  -2    2.66    0.22
   4 -11   2    2.13    0.14
  -4 -11   2    2.39    0.20
   4 -11  -2    2.46    0.18
   4 -11  -2    2.37    0.15
   4 -11  -2    1.92    0.21
   5  11  -2    4.10    0.22
  -5 -11  -2    4.58    0.27
   5 -11   2    4.08    0.18
   5 -11   2    4.96    0.23
  -5 -11   2    4.72    0.25
   5 -11  -2    4.20    0.22
   0 -12   2    0.07    0.14
   0 -12  -2    0.01    0.13
   0 -12  -2    0.00    0.10
   0 -12  -2   -0.01    0.13
  -1 -12  -2    1.09    0.13
  -1 -12  -2    1.21    0.17
   1 -12   2    1.27    0.17
   1 -12   2    1.01    0.12
   1 -12   2    1.02    0.16
   1 -12  -2    1.00    0.17
   1 -12  -2    1.16    0.16
   1 -12  -2    0.93    0.12
   2 -12   2    0.24    0.14
   2 -12   2    0.26    0.15
   2 -12   2    0.32    0.10
  -2 -12  -2    0.31    0.17
   2 -12  -2    0.38    0.14
   2 -12  -2    0.26    0.15
   2 -12  -2    0.23    0.10
   3 -12   2   19.17    0.60
   3 -12   2   20.22    0.51
   3 -12   2   19.80    0.55
  -3 -12  -2   19.74    0.60
   3 -12  -2   19.38    0.51
  -3 -12   2   18.89    0.57
   3 -12  -2   19.24    0.59
   3 -12  -2   19.81    0.55
   4 -12   2   18.04    0.46
   4 -12   2   17.87    0.54
  -4 -12  -2   18.15    0.54
   4 -12   2   18.40    0.50
   4 -12  -2   17.69    0.50
   4 -12  -2   17.74    0.54
  -4 -12   2   17.79    0.52
   4 -12  -2   17.56    0.46
   5 -12   2    0.25    0.11
   5 -12   2    0.07    0.08
  -5 -12  -2    0.20    0.13
   5 -12  -2    0.19    0.11
  -5 -12   2    0.16    0.12
   0 -13  -2    0.46    0.11
   0 -13  -2    0.61    0.15
   0 -13  -2    0.42    0.16
  -1 -13  -2    3.51    0.19
   1 -13   2    2.99    0.23
   1 -13   2    3.67    0.30
   1 -13   2    3.32    0.17
  -1 -13  -2    3.29    0.23
   1 -13  -2    3.38    0.21
   1 -13  -2    3.26    0.17
   1 -13  -2    3.43    0.24
   2 -13   2   17.94    0.47
   2 -13   2   17.45    0.55
   2 -13   2   18.23    0.52
  -2 -13  -2   17.10    0.54
   2 -13  -2   17.60    0.56
   2 -13  -2   18.33    0.48
   2 -13  -2   17.56    0.52
   3 -13   2    3.20    0.23
   3 -13   2    3.21    0.20
  -3 -13  -2    3.32    0.25
   3 -13   2    2.94    0.16
   3 -13  -2    3.41    0.20
   3 -13  -2    3.75    0.19
   3 -13  -2    3.09    0.23
  -3 -13   2    3.05    0.22
   4 -13   2   10.75    0.30
   4 -13   2   10.68    0.34
   4 -13   2   10.65    0.38
  -4 -13  -2   10.24    0.37
  -4 -13   2   10.85    0.36
   4 -13  -2   10.54    0.30
   4 -13  -2    9.78    0.39
   4 -13  -2   10.66    0.34
   5 -13   2    1.92    0.10
   5 -13   2    1.65    0.13
   5 -13  -2    1.82    0.13
  -5 -13   2    2.13    0.18
   0 -14  -2    5.32    0.31
   0 -14  -2    5.47    0.23
   0 -14  -2    4.95    0.28
  -1 -14  -2    4.65    0.26
   1 -14   2    4.52    0.21
   1 -14   2    4.45    0.29
   1 -14  -2    4.61    0.29
   1 -14  -2    4.71    0.22
   1 -14  -2    5.00    0.27
   2 -14   2    7.44    0.34
   2 -14   2    7.76    0.32
   2 -14   2    7.70    0.26
  -2 -14  -2    7.25    0.34
   2 -14  -2    7.65    0.26
   2 -14  -2    7.60    0.32
   2 -14  -2    7.05    0.33
   3 -14   2    0.95    0.16
   3 -14   2    1.30    0.11
   3 -14   2    1.02    0.14
   3 -14  -2    1.17    0.17
   3 -14  -2    1.15    0.15
   3 -14  -2    1.10    0.11
   4 -14   2    1.05    0.12
  -4 -14  -2    0.86    0.15
   4 -14   2    1.14    0.09
  -4 -14   2    1.16    0.14
   4 -14  -2    1.17    0.13
   4 -14  -2    1.12    0.10
   0 -15  -2    0.92    0.16
   0 -15  -2    1.03    0.12
   1 -15   2    2.78    0.15
  -1 -15  -2    2.34    0.19
   1 -15   2    2.58    0.21
   1 -15  -2    2.10    0.19
   1 -15  -2    2.72    0.19
   1 -15  -2    2.69    0.15
   2 -15   2    4.24    0.25
   2 -15   2    4.17    0.26
   2 -15   2    4.44    0.19
   2 -15  -2    4.36    0.27
   2 -15  -2    4.74    0.19
   2 -15  -2    4.50    0.24
   3 -15   2    8.72    0.30
   3 -15   2    9.09    0.26
   3 -15  -2    8.92    0.26
   3 -15  -2    8.84    0.30
   0 -16  -2    7.08    0.29
   0 -16  -2    6.62    0.23
   1 -16   2    5.04    0.20
   1 -16  -2    5.40    0.25
   1 -16  -2    5.62    0.20
   2 -16   2    1.55    0.11
   2 -16  -2    1.62    0.14
   2 -16  -2    1.60    0.11
   1 -17  -2   -0.08    0.14
   1 -17  -2    0.00    0.07
   0   0  -3    0.05    0.03
   1   0   3   46.70    1.02
   1   0  -3   45.75    1.04
   2   0   3    5.77    0.15
   2   0  -3    5.27    0.18
   3   0  -3  164.95    3.66
   3   0   3  164.20    3.63
   4   0  -3   36.33    0.88
   4   0  -3   35.83    0.85
   5   0   3   44.03    1.10
  -5   0  -3   46.87    1.18
  -5   0   3   45.28    1.14
   5   0  -3   43.65    1.12
   5   0  -3   46.31    1.06
  -6   0  -3   47.13    1.19
   6   0   3   46.08    1.12
   6   0  -3   45.03    1.08
  -6   0   3   46.31    1.16
   7   0   3    0.87    0.13
  -7   0  -3    1.28    0.18
  -7   0   3    0.99    0.15
   0  -1  -3   29.21    0.67
   0  -1   3   30.56    0.67
   1   1  -3  217.94    4.71
   1  -1   3  216.22    4.69
   1  -1  -3  208.94    4.70
   2  -1   3   67.74    1.53
   2   1  -3   68.08    1.55
   2  -1  -3   69.18    1.55
   2   1   3   70.42    1.52
   3  -1   3   29.43    0.69
   3   1  -3   29.96    0.71
   3  -1  -3   28.87    0.71
   4   1  -3   13.14    0.37
   4   1  -3   13.71    0.41
   4  -1  -3   13.18    0.40
   4  -1  -3   13.29    0.36
   5  -1   3    5.25    0.27
   5   1  -3    5.32    0.23
  -5   1   3    5.00    0.30
  -5  -1  -3    5.09    0.32
  -5   1  -3    4.75    0.32
   5  -1  -3    5.18    0.28
   5   1   3    5.16    0.28
   5  -1  -3    5.15    0.23
  -5  -1   3    4.74    0.29
  -6  -1  -3   26.21    0.76
  -6   1   3   24.36    0.73
   6  -1   3   25.91    0.69
   6   1  -3   26.70    0.65
  -6   1  -3   27.73    0.78
  -6  -1   3   25.58    0.73
   6   1   3   25.34    0.68
   6  -1  -3   25.32    0.64
  -7  -1  -3    4.03    0.24
   7  -1   3    3.88    0.21
  -7   1   3    3.66    0.21
   7   1   3    4.28    0.21
  -7  -1   3    4.10    0.24
  -7   1  -3    4.12    0.24
   0  -2   3  580.13   12.77
   0  -2  -3  585.79   12.74
   1   2  -3   53.26    1.19
   1  -2   3   52.93    1.18
   1  -2  -3   52.76    1.19
   2   2  -3   94.69    2.11
   2  -2   3   95.55    2.10
   2  -2  -3   93.94    2.12
   3   2  -3   13.10    0.36
   3  -2   3   12.61    0.34
   3  -2  -3   12.94    0.36
   4   2  -3   37.57    0.87
   4  -2   3   36.19    0.87
   4   2  -3   37.44    0.90
   4  -2  -3   36.11    0.86
   4  -2  -3   36.64    0.90
  -5  -2  -3    0.52    0.21
   5  -2   3    0.38    0.14
  -5   2   3    0.15    0.19
   5   2  -3    0.41    0.12
   5  -2  -3    0.38    0.18
   5   2   3    0.36    0.13
  -5   2  -3    0.47    0.21
   5  -2  -3    0.39    0.11
  -5  -2   3    0.28    0.17
   5   2   3    0.52    0.15
   6   2  -3   11.64    0.35
  -6   2   3   11.18    0.44
  -6  -2  -3   11.32    0.46
   6  -2   3   11.12    0.38
   6   2   3   10.84    0.39
   6  -2  -3   10.94    0.34
  -6  -2   3   11.24    0.43
  -6   2  -3   11.26    0.50
   7  -2   3    0.75    0.12
  -7   2   3    0.57    0.14
  -7  -2  -3    0.57    0.15
  -7  -2   3    0.61    0.13
  -7   2  -3    0.83    0.17
   7   2   3    0.51    0.12
   0  -3   3 1000.00   21.68
   0  -3  -3  976.79   21.61
   1   3  -3   36.50    0.84
   1  -3   3   36.53    0.83
   1  -3  -3   37.51    0.84
   2  -3   3   69.60    1.56
   2   3  -3   69.41    1.57
   2  -3  -3   69.90    1.57
   3  -3   3    6.74    0.22
   3   3  -3    6.83    0.24
   3  -3  -3    7.31    0.24
   3  -3  -3    6.44    0.21
   4   3  -3   11.35    0.34
   4  -3   3   11.97    0.35
   4   3  -3   11.24    0.38
   4  -3  -3   12.62    0.38
   4  -3  -3   11.46    0.33
  -5   3   3   30.74    0.86
  -5  -3  -3   30.74    0.84
  -5  -3  -3   30.31    0.86
   5   3  -3   31.53    0.77
   5  -3   3   31.35    0.80
  -5   3  -3   31.60    0.90
   5   3   3   31.39    0.80
   5  -3  -3   30.20    0.82
  -5  -3   3   30.77    0.83
   5  -3  -3   31.61    0.75
  -6   3   3   39.80    1.01
  -6  -3  -3   39.86    1.03
   6  -3   3   39.85    0.97
   6   3  -3   38.99    0.94
  -6   3  -3   40.62    1.06
   6  -3  -3   37.13    0.93
   6   3   3   40.78    0.98
  -6  -3   3   39.95    1.01
  -7  -3  -3    0.20    0.14
  -7   3   3    0.10    0.14
   7  -3   3    0.08    0.10
  -7  -3   3    0.26    0.13
   7   3   3    0.29    0.12
  -7   3  -3    0.29    0.15
   0  -4  -3  315.52    7.03
   0  -4   3  327.01    7.04
   1  -4   3   38.98    0.88
   1   4  -3   38.37    0.88
   1  -4  -3   38.81    0.88
   2   4  -3   10.14    0.28
   2  -4   3    9.91    0.27
   2  -4  -3   10.18    0.29
   3  -4   3   24.69    0.60
   3   4  -3   24.51    0.61
   3  -4   3   23.52    0.62
   3  -4  -3   24.38    0.61
   3  -4  -3   24.37    0.58
  -4  -4  -3    9.62    0.40
   4  -4   3   10.38    0.33
   4  -4   3    9.98    0.34
  -4  -4   3    9.82    0.41
  -4  -4   3    9.73    0.38
   4  -4  -3    9.31    0.35
   4  -4  -3   10.07    0.29
  -4   4  -3   10.34    0.56
  -5  -4  -3    2.60    0.26
   5   4  -3    3.00    0.18
   5  -4   3    2.82    0.20
  -5  -4  -3    2.83    0.24
  -5  -4   3    3.09    0.23
  -5   4  -3    3.03    0.29
   5   4   3    3.14    0.22
   5  -4  -3    2.88    0.20
  -5  -4   3    2.95    0.22
   5  -4  -3    2.53    0.15
  -6   4   3    2.34    0.23
   6   4  -3    2.20    0.16
   6  -4   3    2.37    0.18
  -6  -4  -3    2.38    0.24
   6   4   3    2.30    0.20
   6   4   3    2.49    0.19
  -6   4  -3    1.78    0.24
  -6  -4   3    2.42    0.20
   7  -4   3    1.35    0.12
  -7  -4  -3    1.25    0.15
  -7   4  -3    1.64    0.17
  -7  -4   3    1.30    0.14
   0  -5   3  185.48    3.95
   0  -5  -3  173.53    3.94
   1  -5   3   32.45    0.74
   1   5  -3   31.45    0.74
  -1  -5   3   32.04    0.74
   1  -5  -3   31.74    0.74
   2  -5   3   74.28    1.66
   2   5  -3   73.03    1.66
   2  -5  -3   73.59    1.67
   3   5  -3    8.24    0.28
   3  -5   3    7.79    0.26
   3  -5   3    7.84    0.29
   3  -5  -3    7.93    0.29
   3  -5  -3    7.82    0.24
   3  -5  -3    8.10    0.28
  -4  -5  -3    2.53    0.22
   4  -5   3    2.35    0.19
   4  -5   3    2.33    0.16
  -4  -5  -3    2.63    0.22
   4  -5   3    2.43    0.15
   4  -5   3    2.54    0.18
   4  -5  -3    2.53    0.14
  -4  -5   3    2.98    0.22
  -4   5  -3    2.34    0.27
   4  -5  -3    2.45    0.18
  -4  -5   3    2.18    0.20
   4  -5  -3    2.52    0.19
  -5  -5  -3    6.72    0.40
   5  -5   3    6.32    0.25
  -5  -5  -3    6.55    0.37
   5   5  -3    7.00    0.27
   5  -5   3    6.54    0.30
  -5  -5   3    7.05    0.34
  -5  -5   3    6.76    0.34
  -5   5  -3    7.18    0.42
   5  -5  -3    6.37    0.25
   5  -5  -3    6.54    0.31
   5   5   3    6.53    0.32
  -6  -5  -3    3.59    0.25
   6  -5   3    2.97    0.19
  -6  -5  -3    3.26    0.24
   6   5  -3    3.32    0.18
  -6  -5   3    3.72    0.23
   6   5   3    3.35    0.21
   6   5   3    3.19    0.19
  -6   5  -3    3.57    0.28
   7  -5   3   10.85    0.31
  -7  -5  -3   10.68    0.35
  -7   5  -3   10.51    0.36
  -7  -5   3   10.68    0.33
   0  -6  -3   37.46    0.87
   0  -6   3   39.63    0.88
   1   6  -3   18.14    0.44
   1  -6   3   18.21    0.44
   1  -6  -3   17.74    0.44
  -1  -6   3   17.93    0.44
   2  -6   3   28.38    0.71
   2   6  -3   28.77    0.68
   2  -6   3   29.01    0.68
   2  -6  -3   28.11    0.66
   2  -6  -3   28.33    0.69
   2  -6  -3   27.92    0.71
   3  -6   3   25.58    0.63
   3  -6   3   25.70    0.67
   3  -6  -3   25.72    0.66
   3  -6  -3   25.22    0.65
   3  -6  -3   24.79    0.60
   4  -6   3    0.80    0.14
   4  -6   3    0.99    0.14
  -4  -6  -3    1.04    0.18
   4  -6   3    0.70    0.11
  -4  -6  -3    0.90    0.18
   4  -6   3    0.68    0.15
   4  -6  -3    0.92    0.15
  -4  -6   3    0.86    0.17
   4  -6  -3    0.96    0.11
   4  -6  -3    0.63    0.15
  -4  -6   3    0.73    0.16
  -4   6  -3    0.89    0.24
   5  -6   3   30.15    0.74
   5  -6   3   30.98    0.78
  -5  -6  -3   29.96    0.83
   5   6  -3   30.45    0.76
   5  -6  -3   30.13    0.77
  -5   6  -3   28.54    0.87
  -5  -6   3   29.92    0.80
   5   6   3   31.26    0.79
  -5  -6   3   31.44    0.81
   6  -6   3    3.89    0.22
  -6  -6  -3    3.34    0.24
  -6  -6  -3    3.60    0.24
   6   6  -3    3.41    0.18
   6   6   3    3.79    0.21
  -6  -6   3    3.55    0.22
  -6   6  -3    3.31    0.27
   6  -6  -3    3.63    0.20
   6   6   3    3.69    0.19
  -6  -6   3    3.47    0.22
   7  -6   3    0.96    0.11
  -7  -6   3    0.83    0.12
  -7   6  -3    0.61    0.14
   0  -7   3   21.01    0.51
   1  -7   3   44.20    1.08
  -1  -7  -3   45.99    1.04
   1  -7   3   45.62    1.05
   1   7  -3   45.66    1.05
  -1  -7   3   45.29    1.05
   1  -7  -3   46.31    1.08
   1  -7  -3   47.02    1.05
   2  -7   3   18.32    0.46
   2  -7   3   17.51    0.50
   2   7  -3   17.79    0.47
   2  -7  -3   18.05    0.44
   2  -7  -3   18.30    0.47
   2  -7  -3   18.16    0.50
   3  -7   3   25.71    0.68
   3  -7   3   26.03    0.65
  -3  -7  -3   25.66    0.70
   3  -7  -3   26.35    0.67
  -3  -7   3   25.98    0.69
   3  -7  -3   25.98    0.68
   3  -7  -3   24.98    0.62
   4  -7   3    1.51    0.16
  -4  -7  -3    1.20    0.20
  -4  -7  -3    1.76    0.20
   4  -7   3    1.24    0.16
   4  -7   3    1.26    0.17
   4  -7   3    1.29    0.12
  -4   7  -3    1.35    0.25
  -4  -7   3    1.43    0.19
   4  -7  -3    1.38    0.18
   4  -7  -3    1.45    0.16
  -4  -7   3    1.21    0.17
   4  -7  -3    1.45    0.13
   5  -7   3    4.05    0.21
   5  -7   3    3.94    0.22
  -5  -7  -3    3.88    0.27
   5   7  -3    3.93    0.21
   5   7   3    4.36    0.25
  -5   7  -3    3.64    0.31
  -5  -7   3    4.16    0.25
  -5  -7   3    4.22    0.25
   5  -7  -3    3.95    0.23
   6  -7   3    1.76    0.15
   6   7  -3    1.46    0.14
  -6  -7  -3    1.44    0.18
  -6  -7   3    1.56    0.17
  -6  -7   3    1.55    0.17
   6   7   3    1.62    0.15
   6  -7  -3    1.81    0.16
  -6   7  -3    1.78    0.21
   0  -8   3    0.30    0.07
   0  -8  -3    0.36    0.08
   0  -8  -3    0.45    0.10
   0  -8   3    0.39    0.10
  -1  -8  -3   23.13    0.60
   1   8  -3   23.68    0.58
   1  -8   3   23.89    0.61
   1  -8   3   23.63    0.57
  -1  -8  -3   23.01    0.57
  -1  -8   3   23.62    0.57
   1  -8  -3   22.55    0.56
   1  -8  -3   23.73    0.61
   1  -8  -3   23.11    0.57
   2  -8   3   24.17    0.64
   2  -8   3   24.56    0.60
   2  -8  -3   23.61    0.58
   2  -8  -3   24.23    0.64
   2  -8  -3   23.86    0.61
   3  -8   3    3.63    0.20
   3  -8   3    3.36    0.18
  -3  -8  -3    3.72    0.24
  -3  -8  -3    3.63    0.24
   3  -8   3    2.64    0.20
   3  -8   3    3.08    0.18
   3  -8   3    3.30    0.27
   3  -8  -3    3.42    0.19
  -3  -8   3    3.53    0.23
   3  -8  -3    3.29    0.16
   3  -8  -3    3.28    0.20
   3  -8  -3    2.92    0.21
   3  -8  -3    3.29    0.18
  -3  -8   3    3.49    0.22
  -4  -8  -3    8.77    0.40
   4  -8   3    8.07    0.29
   4  -8   3    8.77    0.33
   4  -8   3    8.63    0.37
  -4  -8  -3    8.53    0.39
  -4  -8   3    8.97    0.37
   4  -8  -3    8.62    0.43
  -4  -8   3    8.80    0.37
  -4   8  -3    8.72    0.48
   4  -8  -3    9.16    0.34
  -5  -8  -3    9.03    0.41
   5   8  -3    9.83    0.33
   5  -8   3    9.21    0.34
   5  -8   3    9.33    0.30
  -5  -8   3    9.50    0.38
   5  -8  -3    9.26    0.34
  -5  -8   3    9.73    0.38
  -5   8  -3    9.41    0.47
   5   8   3    9.76    0.37
  -6  -8  -3    3.96    0.23
   6  -8   3    3.92    0.21
   6   8  -3    3.91    0.20
  -6   8  -3    3.46    0.24
  -6  -8   3    3.63    0.20
   6  -8  -3    3.77    0.19
  -6  -8   3    3.42    0.20
   6   8   3    3.78    0.21
   0  -9   3   15.61    0.41
   0  -9   3   15.38    0.44
   0  -9  -3   15.69    0.41
   0  -9  -3   15.72    0.45
  -1  -9  -3   18.45    0.48
   1  -9   3   18.91    0.49
   1   9  -3   19.09    0.50
  -1  -9  -3   19.46    0.53
   1  -9   3   18.81    0.53
   1  -9  -3   18.87    0.47
   1  -9  -3   19.41    0.53
  -1  -9   3   19.17    0.49
  -2  -9  -3    5.38    0.29
   2  -9   3    5.12    0.21
   2  -9   3    5.21    0.22
  -2  -9  -3    6.27    0.41
   2  -9   3    5.66    0.26
  -2  -9   3    5.16    0.29
   2  -9  -3    5.20    0.27
   2  -9  -3    5.68    0.27
   2  -9  -3    5.37    0.21
   2  -9  -3    5.65    0.25
   2  -9  -3    5.30    0.21
  -3  -9  -3   13.34    0.47
  -3  -9  -3   13.81    0.46
   3  -9   3   12.72    0.41
   3  -9   3   13.25    0.45
   3  -9   3   12.71    0.37
   3  -9   3   12.62    0.41
  -3  -9   3   13.30    0.44
   3  -9  -3   12.69    0.42
   3  -9  -3   12.74    0.41
  -3  -9   3   12.48    0.44
   3  -9  -3   12.76    0.36
   3  -9  -3   13.56    0.44
   3  -9  -3   12.81    0.37
   4  -9   3   12.99    0.38
  -4  -9  -3   12.82    0.47
  -4  -9  -3   13.39    0.48
   4  -9   3   12.85    0.41
   4  -9   3   13.16    0.46
   4  -9  -3   13.42    0.42
  -4  -9   3   14.24    0.45
  -4   9  -3   12.74    0.55
   4  -9  -3   12.40    0.46
   4  -9  -3   12.94    0.38
  -4  -9   3   12.62    0.45
  -5  -9  -3    1.07    0.19
   5  -9   3    1.06    0.14
   5  -9   3    1.28    0.12
   5   9  -3    1.25    0.14
  -5  -9   3    1.01    0.16
  -5  -9   3    1.15    0.18
   5   9   3    1.00    0.17
  -5   9  -3    0.93    0.23
   5  -9  -3    1.08    0.15
   6  -9   3    4.08    0.20
  -6  -9  -3    4.16    0.24
   6  -9  -3    4.22    0.21
  -6  -9   3    3.90    0.24
  -6  -9   3    4.10    0.23
   0 -10  -3    0.06    0.11
   0 -10   3    0.08    0.09
   0 -10  -3    0.17    0.14
   0 -10  -3    0.20    0.09
   0 -10   3    0.19    0.11
   1 -10   3   23.97    0.62
   1 -10   3   24.34    0.66
  -1 -10  -3   25.65    0.66
  -1 -10  -3   24.26    0.65
   1 -10   3   24.24    0.61
   1 -10  -3   24.36    0.67
   1 -10  -3   25.03    0.60
   1 -10  -3   24.54    0.65
   1 -10  -3   24.68    0.61
   2 -10   3    4.86    0.24
  -2 -10  -3    5.27    0.29
  -2 -10  -3    5.10    0.30
   2 -10   3    5.33    0.28
   2 -10   3    4.70    0.21
   2 -10   3    5.22    0.27
   2 -10  -3    4.72    0.22
   2 -10  -3    5.08    0.26
   2 -10  -3    4.57    0.33
  -2 -10   3    5.86    0.27
   2 -10  -3    4.59    0.21
   2 -10  -3    4.99    0.28
   3 -10   3    9.43    0.29
  -3 -10  -3    8.52    0.39
  -3 -10  -3    9.17    0.40
   3 -10   3    8.65    0.33
   3 -10   3    9.00    0.37
  -3 -10   3    8.63    0.36
  -3 -10   3    8.74    0.38
   3 -10  -3    8.91    0.30
   3 -10  -3    9.37    0.34
   3 -10  -3    8.85    0.38
  -4 -10  -3   10.04    0.43
   4 -10   3   10.17    0.36
  -4 -10  -3   10.07    0.41
   4 -10   3    9.56    0.40
   4 -10   3   10.12    0.31
   4 -10  -3   10.07    0.32
   4 -10  -3    9.85    0.40
  -4 -10   3   10.38    0.39
   4 -10  -3   10.34    0.37
  -4 -10   3   10.10    0.40
   5 -10   3    3.29    0.18
  -5 -10  -3    2.58    0.21
   5  10  -3    3.40    0.18
   5 -10   3    3.25    0.19
  -5 -10   3    3.22    0.20
  -5 -10   3    3.34    0.22
   5 -10  -3    3.18    0.19
  -6 -10  -3    0.24    0.12
   6 -10   3    0.11    0.09
  -6 -10   3    0.17    0.11
   6 -10  -3    0.25    0.11
   0 -11  -3   17.24    0.48
   0 -11  -3   17.79    0.47
   0 -11  -3   18.80    0.53
   0 -11  -3   18.51    0.54
   0 -11   3   18.35    0.53
  -1 -11  -3    8.08    0.33
  -1 -11  -3    7.52    0.27
   1 -11   3    7.19    0.29
  -1 -11  -3    8.75    0.44
   1 -11   3    7.95    0.33
   1 -11   3    7.66    0.26
   1 -11  -3    8.21    0.34
   1 -11  -3    7.75    0.31
   1 -11  -3    7.81    0.27
   1 -11  -3    8.19    0.28
  -2 -11  -3   17.48    0.54
   2 -11   3   16.33    0.46
   2 -11   3   18.65    0.55
  -2 -11  -3   17.71    0.68
   2 -11   3   17.56    0.51
  -2 -11   3   17.41    0.53
   2 -11  -3   17.39    0.51
   2 -11  -3   17.95    0.54
   2 -11  -3   18.40    0.55
   2 -11  -3   17.76    0.47
  -3 -11  -3    1.13    0.21
   3 -11   3    0.91    0.17
   3 -11   3    1.38    0.13
   3 -11   3    1.39    0.16
  -3 -11  -3    0.99    0.19
   3 -11  -3    0.93    0.18
   3 -11  -3    1.08    0.16
  -3 -11   3    1.11    0.17
   3 -11  -3    1.13    0.12
   4 -11   3    0.36    0.10
   4 -11   3    0.13    0.12
   4 -11   3    0.30    0.16
  -4 -11  -3    0.33    0.17
  -4 -11  -3    0.38    0.17
  -4 -11   3    0.28    0.15
   4 -11  -3    0.21    0.10
   4 -11  -3    0.16    0.13
   4 -11  -3    0.29    0.16
   5  11  -3    1.80    0.14
  -5 -11  -3    2.33    0.19
   5 -11   3    2.13    0.16
   5 -11   3    1.95    0.12
  -5 -11   3    1.85    0.16
   5 -11  -3    2.07    0.16
   0 -12  -3    6.17    0.30
   0 -12  -3    6.38    0.32
   0 -12  -3    5.98    0.24
   0 -12   3    6.29    0.32
   1 -12   3    4.23    0.20
  -1 -12  -3    4.16    0.25
  -1 -12  -3    3.90    0.21
   1 -12   3    3.97    0.25
   1 -12  -3    4.11    0.23
   1 -12  -3    4.24    0.21
   1 -12  -3    4.67    0.28
   1 -12  -3    4.15    0.21
   2 -12   3   12.90    0.37
  -2 -12  -3   12.26    0.45
   2 -12   3   12.76    0.42
   2 -12   3   12.76    0.46
   2 -12  -3   13.87    0.47
   2 -12  -3   12.49    0.37
  -2 -12   3   13.39    0.55
   2 -12  -3   12.16    0.41
   3 -12   3    2.83    0.23
   3 -12   3    3.20    0.17
  -3 -12  -3    2.36    0.22
  -3 -12  -3    2.91    0.25
   3 -12   3    2.95    0.20
   3 -12  -3    2.69    0.20
  -3 -12   3    2.67    0.21
   3 -12  -3    2.74    0.23
   3 -12  -3    2.78    0.16
   4 -12   3    4.00    0.23
   4 -12   3    3.41    0.23
  -4 -12  -3    3.94    0.24
   4 -12   3    3.85    0.18
  -4 -12   3    3.89    0.22
   4 -12  -3    3.74    0.19
   4 -12  -3    3.70    0.25
   4 -12  -3    3.73    0.21
   5 -12   3    1.67    0.11
   5 -12   3    1.67    0.14
  -5 -12  -3    1.86    0.16
  -5 -12   3    1.91    0.15
   5 -12  -3    1.73    0.14
   0 -13  -3    7.95    0.35
   0 -13  -3    7.22    0.27
   0 -13  -3    7.44    0.33
   1 -13   3   17.05    0.53
  -1 -13  -3   16.09    0.46
  -1 -13  -3   17.42    0.52
   1 -13   3   16.34    0.45
   1 -13  -3   17.17    0.46
   1 -13  -3   16.87    0.53
   1 -13  -3   16.86    0.51
   2 -13   3    1.72    0.18
   2 -13   3    1.87    0.20
  -2 -13  -3    2.04    0.21
   2 -13   3    1.85    0.14
   2 -13  -3    1.52    0.18
   2 -13  -3    1.84    0.19
   2 -13  -3    1.77    0.14
   3 -13   3   13.76    0.47
  -3 -13  -3   13.45    0.48
   3 -13   3   14.63    0.43
   3 -13   3   14.53    0.39
  -3 -13  -3   13.26    0.46
   3 -13  -3   14.60    0.43
   3 -13  -3   14.22    0.39
   3 -13  -3   14.03    0.47
  -3 -13   3   14.15    0.45
   4 -13   3    4.73    0.23
  -4 -13  -3    4.88    0.28
   4 -13   3    4.16    0.27
   4 -13   3    4.76    0.19
  -4 -13   3    4.48    0.24
   4 -13  -3    4.81    0.23
   4 -13  -3    4.73    0.19
   0 -14  -3    4.40    0.29
   0 -14  -3    4.31    0.24
   0 -14  -3    3.91    0.21
   1 -14   3    3.59    0.19
   1 -14   3    3.66    0.24
  -1 -14  -3    3.32    0.17
  -1 -14  -3    3.64    0.23
   1 -14  -3    3.60    0.20
   1 -14  -3    3.66    0.22
   1 -14  -3    3.46    0.24
  -2 -14  -3    5.83    0.31
   2 -14   3    6.11    0.23
   2 -14   3    5.96    0.30
   2 -14  -3    6.22    0.24
   2 -14  -3    5.82    0.29
   2 -14  -3    5.50    0.31
   3 -14   3    2.09    0.13
   3 -14   3    1.94    0.19
   3 -14   3    2.09    0.16
   3 -14  -3    2.19    0.20
   3 -14  -3    2.34    0.17
   3 -14  -3    1.85    0.13
   4 -14   3    1.66    0.10
  -4 -14  -3    1.69    0.16
   4 -14   3    1.52    0.13
  -4 -14   3    1.53    0.14
   4 -14  -3    1.69    0.14
   4 -14  -3    1.43    0.10
   0 -15  -3    0.02    0.14
   0 -15  -3    0.06    0.10
   0 -15  -3   -0.06    0.16
   1 -15   3    8.34    0.35
   1 -15   3    8.24    0.27
  -1 -15  -3    7.88    0.33
   1 -15  -3    9.34    0.28
   1 -15  -3    8.53    0.35
   1 -15  -3    8.67    0.32
  -2 -15  -3    3.19    0.21
   2 -15   3    3.26    0.17
   2 -15   3    3.44    0.22
   2 -15  -3    3.43    0.17
   2 -15  -3    3.36    0.19
   2 -15  -3    3.10    0.22
   3 -15   3    2.09    0.12
   3 -15  -3    2.14    0.12
   3 -15  -3    1.93    0.15
   0 -16  -3    5.71    0.26
   0 -16  -3    5.45    0.21
  -1 -16  -3    5.41    0.26
   1 -16  -3    5.46    0.20
   1 -16  -3    5.50    0.25
   2 -16   3    5.19    0.19
   2 -16  -3    5.63    0.23
   2 -16  -3    5.84    0.19
   0 -17  -3    3.11    0.20
   1 -17  -3    0.63    0.12
   1 -17  -3    0.61    0.08
   0   0  -4   90.31    1.99
   1   0   4  162.13    3.56
   1   0  -4  162.91    3.58
   2   0   4   86.15    1.89
   2   0  -4   84.71    1.91
   3   0  -4    0.57    0.08
   3   0  -4    0.48    0.10
   4   0  -4    9.58    0.29
   4   0  -4    9.39    0.34
   5   0  -4    0.10    0.19
   5   0   4   -0.08    0.13
   5   0  -4   -0.03    0.11
  -5   0  -4    0.22    0.21
  -5   0   4    0.11    0.17
  -6   0  -4    1.02    0.22
   6   0  -4    1.14    0.13
  -6   0   4    0.97    0.19
   6   0   4    1.05    0.16
  -7   0  -4    3.14    0.21
  -7   0   4    2.73    0.18
   7   0   4    2.86    0.16
   0  -1  -4   84.14    1.88
   0   1  -4   84.97    1.88
   0  -1   4   86.54    1.88
   1   1  -4  138.60    3.03
   1  -1   4  136.20    3.02
   1  -1  -4  137.51    3.03
   1   1   4  137.89    3.01
   2  -1   4   10.84    0.27
   2   1  -4   11.02    0.30
   2   1   4   10.63    0.26
   2  -1  -4   11.30    0.30
   3  -1   4   18.67    0.45
   3   1  -4   18.48    0.48
   3   1  -4   17.69    0.45
   3  -1  -4   17.64    0.45
   3  -1  -4   18.99    0.49
   4   1  -4   41.63    0.99
   4   1  -4   39.16    0.94
   4  -1  -4   39.92    0.98
   4  -1  -4   40.22    0.94
   5   1  -4   25.43    0.74
   5  -1   4   27.25    0.70
  -5   1   4   25.21    0.74
   5   1  -4   27.76    0.67
  -5  -1  -4   25.94    0.78
  -5   1  -4   26.75    0.80
   5  -1  -4   25.94    0.73
   5   1   4   27.09    0.71
  -5  -1   4   26.03    0.74
   5  -1  -4   27.41    0.66
   6  -1   4    6.07    0.28
  -6  -1  -4    5.76    0.33
  -6   1   4    5.68    0.35
   6   1  -4    6.08    0.25
   6   1   4    5.64    0.29
  -6  -1   4    6.78    0.34
   6  -1  -4    6.01    0.24
  -6   1  -4    5.89    0.35
  -7  -1  -4    0.37    0.15
  -7   1   4    0.33    0.13
   7  -1   4    0.38    0.11
   7   1   4    0.45    0.11
  -7   1  -4    0.53    0.16
  -7  -1   4    0.48    0.13
   0  -2   4   16.91    0.41
   0  -2  -4   17.98    0.40
   1   2  -4   82.87    1.84
   1  -2   4   83.04    1.83
   1  -2  -4   82.71    1.84
   2  -2   4   20.61    0.50
   2   2  -4   21.50    0.52
   2  -2  -4   21.40    0.52
   3   2  -4   59.87    1.38
   3  -2   4   62.50    1.38
   3   2  -4   61.30    1.40
   3  -2  -4   59.81    1.40
   3  -2  -4   60.86    1.37
   4   2  -4    2.90    0.20
   4   2  -4    2.98    0.16
   4  -2  -4    2.92    0.16
   4  -2  -4    3.02    0.20
   5   2  -4    2.86    0.17
   5  -2   4    2.66    0.19
  -5  -2  -4    3.14    0.27
  -5   2   4    2.63    0.24
   5  -2  -4    2.53    0.16
   5  -2  -4    2.73    0.24
   5   2   4    2.51    0.20
  -5   2  -4    2.11    0.27
  -5  -2   4    2.45    0.22
  -6  -2  -4    2.37    0.25
   6  -2   4    2.28    0.19
  -6   2   4    2.57    0.23
   6   2  -4    2.38    0.16
   6  -2  -4    2.33    0.15
   6   2   4    2.49    0.19
  -6   2  -4    2.50    0.26
  -6  -2   4    2.00    0.20
  -7   2   4    0.44    0.14
  -7  -2  -4    0.54    0.15
   7  -2   4    0.76    0.12
  -7  -2   4    0.77    0.13
   7   2   4    0.68    0.12
  -7   2  -4    0.41    0.16
   0  -3   4    0.71    0.05
   0  -3  -4    0.70    0.05
   1   3  -4   49.04    1.11
   1  -3   4   49.40    1.10
   1  -3  -4   49.08    1.11
   2  -3   4   71.59    1.61
   2   3  -4   71.96    1.63
   2  -3  -4   72.75    1.63
   3  -3   4   31.01    0.78
   3  -3   4   31.69    0.75
   3   3  -4   32.40    0.78
   3  -3  -4   31.43    0.74
   3  -3  -4   33.07    0.78
   4  -3   4    9.65    0.31
   4   3  -4    8.98    0.29
  -4  -3  -4    9.09    0.41
   4  -3   4    9.70    0.41
   4   3  -4    9.39    0.35
   4  -3  -4    9.28    0.34
   4  -3  -4    9.11    0.28
   5  -3   4   10.29    0.37
  -5  -3  -4    9.64    0.45
  -5  -3  -4   10.72    0.46
   5   3  -4   11.22    0.34
  -5   3   4   10.12    0.47
  -5  -3   4   10.99    0.41
  -5   3  -4   11.32    0.51
   5   3   4   10.48    0.39
   5  -3  -4   10.13    0.32
  -6  -3  -4    8.16    0.41
   6  -3   4    8.09    0.32
  -6   3   4    7.57    0.38
   6   3  -4    7.98    0.28
   6  -3  -4    7.97    0.28
   6   3   4    7.96    0.33
  -6   3  -4    8.06    0.44
  -6  -3   4    8.24    0.35
  -7  -3  -4    1.05    0.15
   7  -3   4    1.21    0.12
  -7   3  -4    1.22    0.17
  -7  -3   4    1.35    0.14
   7   3   4    1.24    0.13
   0  -4   4   13.02    0.31
   0  -4  -4   12.19    0.30
   1   4  -4    8.32    0.23
   1  -4   4    8.39    0.23
   1  -4  -4    8.62    0.24
   2   4  -4    1.77    0.11
   2  -4   4    1.57    0.09
   2  -4  -4    1.66    0.11
   3   4  -4   25.77    0.64
   3  -4   4   25.25    0.61
   3  -4   4   24.54    0.64
   3  -4  -4   25.84    0.64
   3  -4  -4   24.43    0.60
   4  -4   4    3.10    0.17
  -4  -4  -4    3.66    0.25
   4   4  -4    3.27    0.18
   4  -4   4    3.32    0.18
  -4  -4  -4    3.74    0.24
   4  -4   4    3.55    0.22
   4   4  -4    3.58    0.27
   4  -4   4    3.59    0.20
   4  -4  -4    3.14    0.17
  -4  -4   4    3.94    0.24
  -4   4  -4    3.82    0.31
   4  -4  -4    3.09    0.20
  -4  -4   4    3.10    0.22
   5  -4   4   31.32    0.78
  -5  -4  -4   31.81    0.88
  -5  -4  -4   31.45    0.87
   5  -4   4   33.13    0.82
   5   4  -4   32.53    0.79
  -5  -4   4   31.62    0.83
   5  -4  -4   31.74    0.77
  -5   4  -4   32.95    0.93
  -5  -4   4   32.50    0.85
   5   4   4   32.17    0.83
   6  -4   4    0.13    0.13
  -6  -4  -4    0.00    0.19
   6   4  -4    0.10    0.11
  -6  -4   4   -0.03    0.14
  -6   4  -4   -0.02    0.19
   6  -4  -4    0.01    0.11
   6   4   4   -0.09    0.13
  -7  -4  -4    4.41    0.25
   7  -4   4    4.77    0.21
  -7   4  -4    4.88    0.28
   7   4   4    4.78    0.22
  -7  -4   4    4.78    0.22
   0  -5  -4   94.02    2.07
   0  -5   4   93.63    2.08
   1  -5   4  135.03    2.96
   1   5  -4  133.54    2.97
   1  -5  -4  133.21    2.96
   2   5  -4   47.92    1.13
   2  -5   4   48.66    1.15
   2  -5   4   48.79    1.12
   2  -5  -4   50.31    1.13
   3  -5   4    1.09    0.13
   3  -5   4    0.91    0.10
   3   5  -4    1.11    0.13
   3  -5  -4    0.97    0.13
   3  -5  -4    0.91    0.09
   4   5  -4    3.21    0.17
   4  -5   4    3.06    0.21
   4  -5   4    3.18    0.20
  -4  -5  -4    3.13    0.24
  -4  -5  -4    2.94    0.23
   4  -5   4    3.11    0.16
   4  -5   4    2.51    0.17
   4  -5  -4    2.91    0.19
  -4  -5   4    2.96    0.21
   4  -5  -4    2.71    0.15
   4  -5  -4    3.15    0.20
  -4  -5   4    2.92    0.22
  -4   5  -4    3.12    0.29
  -5  -5  -4    9.25    0.42
   5  -5   4    9.65    0.32
   5  -5   4    9.81    0.36
   5   5  -4    9.69    0.32
  -5  -5  -4    9.88    0.56
  -5   5  -4    9.88    0.48
   5   5   4    9.07    0.38
   5  -5  -4    9.74    0.30
  -5  -5   4    9.96    0.39
  -5  -5   4   10.01    0.39
  -6  -5  -4    1.72    0.21
   6   5  -4    1.56    0.14
   6  -5   4    1.81    0.16
  -6  -5  -4    1.79    0.21
  -6  -5   4    1.96    0.19
   6   5   4    1.83    0.17
  -6   5  -4    1.78    0.24
   7  -5   4    0.70    0.10
  -7   5  -4    0.67    0.15
  -7  -5   4    0.62    0.12
   0  -6   4  195.93    4.32
   1  -6   4   58.79    1.31
   1   6  -4   57.27    1.31
   1  -6  -4   56.77    1.31
  -1  -6   4   58.19    1.31
   2  -6   4   32.74    0.77
   2  -6   4   32.46    0.80
   2   6  -4   32.00    0.78
   2  -6  -4   32.10    0.80
   2  -6  -4   32.27    0.75
   2  -6  -4   32.44    0.78
   3   6  -4   13.67    0.41
   3  -6   4   13.23    0.42
   3  -6   4   13.21    0.38
   3  -6  -4   13.62    0.35
   3  -6  -4   13.20    0.40
   3  -6  -4   13.18    0.42
   4  -6   4   17.21    0.47
   4  -6   4   16.83    0.50
  -4  -6  -4   17.93    0.56
   4  -6   4   18.07    0.51
   4  -6   4   17.61    0.59
   4  -6   4   17.57    0.53
  -4  -6  -4   17.20    0.54
   4  -6  -4   17.85    0.46
  -4  -6   4   17.99    0.54
  -4   6  -4   17.58    0.62
  -4  -6   4   18.06    0.53
   4  -6  -4   17.38    0.51
   4  -6  -4   18.80    0.53
   5   6  -4    6.69    0.27
   5  -6   4    6.66    0.29
  -5  -6  -4    7.40    0.39
   5  -6   4    6.56    0.25
   5  -6  -4    6.40    0.31
  -5  -6   4    6.76    0.34
  -5   6  -4    5.82    0.36
  -5  -6   4    6.60    0.33
   5  -6  -4    6.47    0.25
   5   6   4    7.17    0.32
  -6  -6  -4    6.98    0.34
   6  -6   4    6.94    0.28
   6   6  -4    7.09    0.26
  -6  -6   4    6.65    0.30
   6   6   4    7.31    0.30
  -6   6  -4    6.86    0.38
   6   6   4    6.70    0.27
  -6  -6   4    6.64    0.30
   7  -6   4    6.62    0.22
  -7  -6   4    6.50    0.24
   0  -7  -4   26.85    0.63
   0  -7   4   27.23    0.64
   0  -7  -4   25.95    0.67
   1   7  -4   67.51    1.54
  -1  -7  -4   67.57    1.56
   1  -7   4   70.33    1.54
   1  -7   4   68.79    1.57
  -1  -7  -4   68.10    1.53
   1  -7  -4   66.67    1.53
   1  -7  -4   68.21    1.57
   1  -7  -4   67.22    1.52
  -1  -7   4   68.01    1.54
   2  -7   4    7.90    0.29
   2   7  -4    7.54    0.27
   2  -7   4    8.28    0.26
   2  -7  -4    8.20    0.30
   2  -7  -4    8.04    0.24
   2  -7  -4    7.92    0.27
   3  -7   4    4.34    0.20
  -3  -7  -4    4.85    0.27
   3  -7   4    4.56    0.25
  -3  -7  -4    5.20    0.27
   3  -7   4    4.46    0.22
   3  -7  -4    4.81    0.26
  -3  -7   4    4.57    0.24
   3  -7  -4    4.68    0.33
   3  -7  -4    4.52    0.19
   3  -7  -4    4.75    0.25
  -3  -7   4    4.97    0.26
   4  -7   4   24.85    0.70
  -4  -7  -4   24.96    0.71
   4  -7   4   25.02    0.63
  -4  -7  -4   26.03    0.70
   4  -7   4   25.50    0.66
   4  -7   4   24.27    0.67
  -4   7  -4   24.79    0.78
   4  -7  -4   25.16    0.66
   4  -7  -4   24.73    0.69
  -4  -7   4   24.70    0.68
  -4  -7   4   25.18    0.68
   4  -7  -4   24.55    0.61
   5   7  -4    2.68    0.17
   5  -7   4    2.54    0.19
  -5  -7  -4    2.35    0.23
   5  -7   4    2.47    0.15
  -5  -7   4    2.40    0.20
   5   7   4    3.13    0.22
   5  -7  -4    2.86    0.20
  -5  -7   4    2.85    0.21
  -5   7  -4    2.41    0.27
   5  -7  -4    2.29    0.18
  -6  -7  -4    3.81    0.24
   6   7  -4    3.71    0.21
   6  -7   4    4.07    0.22
  -6   7  -4    3.54    0.26
   6   7   4    4.34    0.23
  -6  -7   4    3.94    0.21
  -6  -7   4    4.28    0.25
   6   7   4    4.39    0.22
   0  -8   4  138.05    3.12
   0  -8  -4  137.07    3.12
   0  -8   4  140.13    3.09
   0  -8  -4  141.07    3.08
  -1  -8  -4   22.49    0.55
   1  -8   4   21.94    0.59
   1  -8   4   22.52    0.56
   1   8  -4   22.77    0.56
  -1  -8  -4   22.04    0.59
   1  -8  -4   22.22    0.59
  -1  -8   4   22.12    0.55
   1  -8  -4   22.53    0.54
   2   8  -4    4.67    0.24
   2  -8   4    4.94    0.21
   2  -8   4    5.38    0.25
   2  -8  -4    5.11    0.23
   2  -8  -4    4.72    0.25
   2  -8  -4    4.72    0.19
  -3  -8  -4    5.28    0.28
   3  -8   4    4.95    0.24
   3  -8   4    4.89    0.26
   3  -8   4    4.50    0.21
   3  -8   4    4.72    0.30
   3  -8   4    5.68    0.28
  -3  -8  -4    5.39    0.29
   3  -8  -4    4.85    0.22
  -3  -8   4    5.05    0.28
   3  -8  -4    5.01    0.27
   3  -8  -4    4.61    0.26
   3  -8  -4    5.15    0.20
  -3  -8   4    4.89    0.29
   3  -8  -4    5.15    0.28
  -4  -8  -4    3.19    0.25
   4  -8   4    3.48    0.18
  -4  -8  -4    3.99    0.26
   4  -8   4    3.30    0.24
   4  -8   4    3.64    0.21
  -4   8  -4    3.80    0.32
   4  -8  -4    3.56    0.21
   4  -8  -4    3.35    0.17
  -4  -8   4    3.80    0.24
  -4  -8   4    3.42    0.23
   5  -8   4    6.01    0.27
   5  -8   4    5.60    0.23
   5   8  -4    5.95    0.26
  -5  -8  -4    6.31    0.35
   5   8   4    6.03    0.31
   5  -8  -4    6.07    0.29
  -5  -8   4    6.23    0.32
  -5   8  -4    5.51    0.35
  -5  -8   4    6.65    0.31
   6   8  -4   11.68    0.36
   6  -8   4   12.06    0.35
  -6  -8  -4   12.21    0.39
  -6   8  -4   11.88    0.43
   6   8   4   10.50    0.37
   6  -8  -4   11.75    0.46
  -6  -8   4   11.63    0.37
  -6  -8   4   11.94    0.37
   0  -9   4    0.04    0.08
   0  -9  -4   -0.03    0.08
   0  -9  -4    0.06    0.10
   0  -9   4    0.02    0.10
   1  -9   4   13.21    0.41
   1  -9   4   12.87    0.37
   1   9  -4   13.02    0.38
  -1  -9  -4   12.81    0.41
  -1  -9  -4   13.96    0.37
   1  -9  -4   13.92    0.42
   1  -9  -4   13.33    0.36
   2  -9   4    8.50    0.33
  -2  -9  -4    8.15    0.34
   2  -9   4    8.32    0.29
  -2  -9  -4    8.14    0.40
   2  -9   4    7.76    0.26
   2  -9  -4    7.80    0.30
   2  -9  -4    8.01    0.27
  -2  -9   4    7.68    0.34
   2  -9  -4    8.44    0.26
  -2  -9   4    8.34    0.33
   2  -9  -4    7.92    0.31
   2  -9  -4    8.37    0.33
  -3  -9  -4    2.55    0.23
   3  -9   4    2.77    0.19
   3  -9   4    2.41    0.18
   3  -9   4    2.68    0.21
   3  -9   4    2.64    0.16
  -3  -9  -4    2.71    0.23
   3  -9   4    2.48    0.26
   3  -9  -4    2.61    0.21
   3  -9  -4    2.82    0.16
   3  -9  -4    3.10    0.17
   3  -9  -4    2.66    0.20
  -3  -9   4    2.53    0.21
   3  -9  -4    2.67    0.19
  -3  -9   4    2.30    0.19
  -4  -9  -4    5.87    0.30
   4  -9   4    5.42    0.32
   4  -9   4    5.70    0.27
   4  -9   4    5.98    0.23
  -4  -9  -4    5.39    0.31
  -4   9  -4    5.63    0.37
   4  -9  -4    5.49    0.29
   4  -9  -4    5.30    0.32
  -4  -9   4    6.04    0.32
  -4  -9   4    5.66    0.31
  -5  -9  -4    0.67    0.18
   5   9  -4    0.58    0.12
   5  -9   4    0.75    0.13
   5  -9   4    0.80    0.11
   5  -9  -4    0.77    0.14
  -5  -9   4    0.61    0.16
  -5   9  -4    0.76    0.22
  -5  -9   4    0.64    0.15
   5   9   4    0.66    0.16
  -6  -9  -4    3.41    0.20
   6  -9   4    3.20    0.18
  -6  -9   4    3.22    0.17
  -6  -9   4    3.14    0.18
   6  -9  -4    3.06    0.17
  -6   9  -4    2.65    0.21
   0 -10  -4   17.75    0.50
   0 -10  -4   18.07    0.52
   0 -10  -4   17.08    0.46
   0 -10  -4   17.59    0.46
   0 -10   4   17.63    0.51
   0 -10   4   17.04    0.47
   1 -10   4   10.18    0.32
   1  10  -4   10.62    0.36
  -1 -10  -4   10.90    0.38
  -1 -10  -4   11.04    0.33
   1 -10   4   10.86    0.37
   1 -10   4   10.85    0.34
  -1 -10  -4   10.67    0.38
   1 -10  -4   10.80    0.32
   1 -10  -4   10.85    0.32
   1 -10  -4   10.90    0.37
   1 -10  -4   10.90    0.38
   2 -10   4    1.59    0.13
   2 -10   4    1.61    0.17
  -2 -10  -4    1.96    0.20
   2 -10   4    1.76    0.18
  -2 -10  -4    1.48    0.22
   2 -10   4    1.65    0.15
   2 -10  -4    1.64    0.13
   2 -10  -4    1.80    0.13
  -2 -10   4    1.70    0.18
   2 -10  -4    1.72    0.17
  -2 -10   4    1.79    0.18
   2 -10  -4    1.31    0.18
  -3 -10  -4    1.49    0.21
   3 -10   4    1.41    0.18
   3 -10   4    1.51    0.17
  -3 -10  -4    1.65    0.20
   3 -10   4    1.29    0.13
   3 -10  -4    1.38    0.17
   3 -10  -4    1.66    0.15
   3 -10  -4    1.49    0.13
   3 -10  -4    1.37    0.19
  -3 -10   4    1.20    0.16
  -3 -10   4    1.98    0.20
  -4 -10  -4    4.38    0.28
  -4 -10  -4    4.15    0.26
   4 -10   4    4.09    0.22
   4 -10   4    4.43    0.21
   4 -10   4    4.14    0.26
  -4  10  -4    3.67    0.32
  -4 -10   4    4.31    0.25
   4 -10  -4    4.35    0.22
   4 -10  -4    4.11    0.23
  -4 -10   4    4.32    0.24
   4 -10  -4    4.25    0.27
  -5 -10  -4    2.40    0.21
   5 -10   4    2.14    0.16
   5 -10   4    2.27    0.21
   5  10  -4    2.17    0.15
   5 -10   4    2.23    0.13
   5 -10  -4    2.08    0.17
   5  10   4    2.29    0.18
  -5 -10   4    2.17    0.18
  -5 -10   4    2.42    0.19
  -6 -10  -4    0.46    0.12
   6 -10   4    0.54    0.10
  -6 -10   4    0.47    0.12
   0 -11  -4    3.97    0.21
   0 -11   4    3.81    0.24
   0 -11  -4    4.12    0.22
   0 -11   4    3.65    0.21
   0 -11  -4    4.12    0.27
   0 -11  -4    3.82    0.19
  -1 -11  -4   17.72    0.47
   1 -11   4   18.16    0.54
   1 -11   4   17.20    0.46
   1 -11   4   16.08    0.49
  -1 -11  -4   18.11    0.54
  -1 -11  -4   18.25    0.53
   1 -11  -4   17.67    0.47
   1 -11  -4   18.13    0.51
   1 -11  -4   18.23    0.54
   1 -11  -4   18.09    0.48
  -2 -11  -4    4.00    0.25
   2 -11   4    4.30    0.28
   2 -11   4    4.03    0.20
   2 -11  -4    3.77    0.22
  -2 -11   4    4.15    0.24
   2 -11  -4    3.74    0.21
   2 -11  -4    3.79    0.25
   2 -11  -4    3.96    0.22
  -3 -11  -4    0.18    0.19
  -3 -11  -4    0.02    0.16
   3 -11   4    0.09    0.09
   3 -11   4    0.08    0.14
   3 -11   4    0.18    0.14
  -3 -11   4    0.04    0.14
  -3 -11   4    0.04    0.16
   3 -11  -4    0.05    0.15
   3 -11  -4    0.06    0.10
   3 -11  -4    0.09    0.14
   4 -11   4    3.12    0.23
   4 -11   4    3.12    0.16
   4 -11   4    3.18    0.19
  -4 -11  -4    3.41    0.23
  -4 -11  -4    3.30    0.24
   4  11  -4    3.39    0.19
  -4 -11   4    3.17    0.21
   4 -11  -4    3.23    0.17
  -4 -11   4    3.40    0.23
   4 -11  -4    2.87    0.23
   4 -11  -4    3.30    0.20
   5 -11   4    2.26    0.12
   5 -11   4    2.15    0.15
  -5 -11  -4    2.09    0.18
  -5 -11   4    2.45    0.18
  -5 -11   4    2.16    0.16
   5 -11  -4    2.06    0.16
   0 -12  -4   10.97    0.35
   0 -12  -4   10.33    0.33
   0 -12  -4   11.31    0.41
   0 -12  -4   11.18    0.39
  -1 -12  -4    0.33    0.11
   1 -12   4    0.33    0.10
  -1 -12  -4    0.25    0.15
   1 -12   4    0.16    0.14
   1 -12  -4    0.31    0.15
   1 -12  -4    0.22    0.10
   1 -12  -4    0.42    0.15
   1 -12  -4    0.47    0.13
   2 -12   4    6.77    0.33
   2 -12   4    6.36    0.25
  -2 -12  -4    6.47    0.34
   2 -12  -4    6.67    0.26
   2 -12  -4    6.01    0.27
  -2 -12   4    6.08    0.33
   2 -12  -4    6.31    0.33
   2 -12  -4    6.39    0.31
   3 -12   4   10.98    0.33
   3 -12   4   10.71    0.41
  -3 -12  -4   10.24    0.41
   3 -12   4   10.39    0.37
  -3 -12  -4   10.74    0.44
  -3 -12   4   10.23    0.39
   3 -12  -4   10.68    0.37
   3 -12  -4   10.80    0.41
   3 -12  -4   10.74    0.33
  -4 -12  -4    3.67    0.24
   4 -12   4    3.93    0.18
  -4 -12  -4    3.65    0.23
   4 -12   4    3.64    0.24
   4 -12   4    3.71    0.20
  -4 -12   4    4.00    0.22
   4 -12  -4    3.71    0.19
   4 -12  -4    3.91    0.23
   4 -12  -4    3.41    0.24
   5 -12   4    0.06    0.10
   5 -12   4    0.14    0.07
  -5 -12  -4    0.00    0.12
  -5 -12   4    0.03    0.11
   5 -12  -4    0.08    0.10
   0 -13  -4    2.68    0.16
   0 -13  -4    2.95    0.21
   0 -13  -4    2.73    0.22
   1 -13   4    1.08    0.12
   1 -13   4    1.28    0.18
  -1 -13  -4    1.37    0.13
  -1 -13  -4    1.57    0.19
   1 -13  -4    1.21    0.13
   1 -13  -4    1.19    0.17
   1 -13  -4    0.93    0.18
   1 -13  -4    1.19    0.15
  -2 -13  -4    1.97    0.20
   2 -13   4    2.13    0.14
   2 -13   4    1.93    0.20
   2 -13  -4    2.14    0.15
   2 -13  -4    1.90    0.21
   2 -13  -4    2.34    0.19
  -3 -13  -4    1.82    0.22
  -3 -13  -4    1.58    0.19
   3 -13   4    1.96    0.20
   3 -13   4    2.03    0.17
   3 -13   4    2.14    0.13
   3 -13  -4    1.85    0.20
  -3 -13   4    2.00    0.18
   3 -13  -4    1.82    0.17
   3 -13  -4    1.77    0.14
   4 -13   4   11.36    0.35
   4 -13   4   11.77    0.32
  -4 -13  -4   11.44    0.39
   4 -13  -4   11.86    0.36
  -4 -13   4   11.62    0.37
   4 -13  -4   11.62    0.32
   0 -14  -4    0.10    0.10
   0 -14  -4    0.14    0.16
   0 -14  -4    0.05    0.14
   1 -14   4    0.25    0.10
  -1 -14  -4    0.28    0.15
   1 -14   4    0.35    0.16
  -1 -14  -4    0.24    0.11
   1 -14  -4    0.31    0.14
   1 -14  -4    0.18    0.10
   1 -14  -4    0.23    0.15
   2 -14   4    4.58    0.28
   2 -14   4    4.83    0.20
  -2 -14  -4    4.89    0.29
   2 -14  -4    4.65    0.28
   2 -14  -4    5.07    0.27
   2 -14  -4    5.29    0.21
   3 -14   4    8.51    0.34
  -3 -14  -4    8.18    0.33
   3 -14   4    8.96    0.26
   3 -14  -4    8.51    0.27
   3 -14  -4    8.55    0.31
   3 -14  -4    8.29    0.34
   4 -14   4    1.44    0.10
   4 -14   4    1.58    0.16
   4 -14  -4    1.47    0.13
  -4 -14   4    1.49    0.14
   4 -14  -4    1.61    0.11
   0 -15  -4    0.22    0.14
   0 -15  -4    0.13    0.16
   0 -15  -4    0.14    0.09
   1 -15   4    9.87    0.38
  -1 -15  -4   10.31    0.36
  -1 -15  -4    9.49    0.30
   1 -15  -4    9.61    0.37
   1 -15  -4   10.48    0.31
   1 -15  -4   10.65    0.35
   2 -15   4    8.88    0.36
   2 -15   4   10.30    0.28
  -2 -15  -4    9.32    0.35
   2 -15  -4   10.14    0.33
   2 -15  -4    9.54    0.36
   2 -15  -4   10.03    0.29
   3 -15   4    1.20    0.10
   3 -15  -4    1.31    0.10
   3 -15  -4    1.37    0.13
   0 -16  -4    2.14    0.17
   0 -16  -4    2.04    0.12
  -1 -16  -4    1.75    0.16
   1 -16  -4    1.52    0.11
   1 -16  -4    1.69    0.15
   2 -16   4    5.04    0.18
  -2 -16  -4    4.99    0.25
   2 -16  -4    5.04    0.22
   0 -17  -4    3.73    0.23
   0   0  -5   -0.01    0.04
   1   0  -5   61.42    1.40
   1   0   5   62.92    1.38
   2   0   5   72.68    1.60
   2   0  -5   71.77    1.63
   3   0  -5    6.86    0.25
   3   0  -5    6.19    0.21
   4   0  -5    0.03    0.09
   4   0  -5    0.02    0.13
  -5   0  -5    0.72    0.23
   5   0  -5    0.91    0.13
  -5   0   5    1.04    0.19
   5   0   5    0.64    0.15
   6   0   5    6.79    0.30
  -6   0   5    6.63    0.34
  -6   0  -5    6.87    0.40
   6   0  -5    6.74    0.26
  -7   0   5    0.74    0.13
   7   0   5    0.85    0.12
  -7   0  -5    0.89    0.16
   0   1  -5   46.00    1.02
   0  -1  -5   44.98    1.02
   1  -1   5   68.20    1.52
   1   1  -5   69.20    1.53
  -1  -1  -5   67.64    1.51
   1  -1  -5   68.60    1.53
   2   1  -5   24.49    0.61
   2  -1   5   25.51    0.58
   2  -1  -5   24.74    0.61
   3   1  -5   16.96    0.42
   3   1  -5   16.62    0.46
   3  -1  -5   16.26    0.42
   3  -1  -5   17.33    0.46
   4   1  -5   43.83    1.10
   4   1  -5   45.54    1.05
   4  -1  -5   44.81    1.10
   4  -1  -5   46.24    1.05
  -5  -1  -5    4.29    0.32
  -5   1   5    4.61    0.28
   5   1  -5    4.70    0.23
   5  -1   5    4.72    0.27
   5   1   5    4.34    0.24
  -5   1  -5    4.62    0.33
  -5  -1   5    4.57    0.27
   5  -1  -5    4.09    0.22
   6  -1   5    1.50    0.16
  -6   1   5    1.20    0.19
  -6  -1  -5    1.52    0.23
   6   1  -5    1.30    0.14
  -6   1  -5    1.25    0.23
  -6  -1   5    1.25    0.18
   6  -1  -5    1.40    0.13
   6   1   5    1.69    0.17
  -7  -1  -5    1.14    0.16
  -7   1   5    1.30    0.15
   7  -1   5    1.44    0.13
  -7  -1   5    1.29    0.14
   7   1   5    1.52    0.13
  -7   1  -5    1.32    0.17
   0  -2   5   12.07    0.29
   0  -2  -5   11.43    0.29
   1  -2   5   14.21    0.34
   1   2  -5   14.03    0.35
   1  -2  -5   13.83    0.35
   2  -2   5   36.01    0.81
   2   2  -5   35.22    0.84
   2  -2  -5   35.31    0.84
   3   2  -5   59.10    1.37
   3   2  -5   57.26    1.33
   3  -2   5   59.71    1.33
   3  -2   5   58.40    1.36
   3  -2  -5   58.42    1.33
   3  -2  -5   59.33    1.37
   4   2  -5   14.24    0.40
   4   2  -5   15.22    0.46
  -4  -2  -5   13.45    0.49
   4  -2  -5   13.92    0.39
   4  -2  -5   14.34    0.45
   4   2   5   14.59    0.45
  -4   2  -5   14.82    0.57
  -4  -2   5   14.47    0.56
  -5  -2  -5   17.78    0.61
  -5   2   5   17.25    0.58
   5  -2   5   18.21    0.52
   5   2  -5   17.99    0.49
  -5  -2   5   17.67    0.55
  -5   2  -5   17.81    0.64
   5   2   5   17.74    0.53
   5  -2  -5   18.11    0.48
  -6   2   5   13.22    0.47
  -6  -2  -5   14.17    0.53
   6  -2   5   14.47    0.45
   6   2  -5   14.37    0.41
  -6  -2   5   14.52    0.47
  -6   2  -5   15.27    0.55
   6   2   5   14.27    0.45
   6  -2  -5   14.23    0.40
  -7  -2  -5    0.04    0.14
   7  -2   5   -0.03    0.10
  -7   2  -5    0.16    0.15
   7   2   5    0.04    0.10
  -7  -2   5   -0.04    0.10
   0  -3   5   80.89    1.78
   0  -3  -5   79.20    1.77
   1  -3   5   61.62    1.40
   1   3  -5   63.12    1.41
   1  -3  -5   63.02    1.41
   2   3  -5    7.65    0.24
   2  -3   5    7.46    0.22
   2  -3  -5    7.25    0.24
   3   3  -5   11.41    0.36
   3   3  -5   10.98    0.32
   3  -3   5   11.77    0.32
   3  -3   5   11.09    0.35
   3  -3  -5   11.36    0.31
   3  -3  -5   11.68    0.35
  -4  -3  -5   12.95    0.45
   4  -3   5   12.47    0.37
   4   3  -5   13.52    0.44
   4   3  -5   13.92    0.38
  -4  -3  -5   13.13    0.49
   4  -3   5   13.92    0.41
   4   3   5   13.52    0.44
  -4  -3   5   12.42    0.44
  -4  -3   5   12.93    0.43
   4  -3  -5   13.09    0.43
  -4   3  -5   13.22    0.54
   5   3  -5    2.16    0.16
  -5  -3  -5    2.66    0.27
   5  -3   5    2.47    0.20
   5  -3   5    2.59    0.16
  -5  -3  -5    2.38    0.24
  -5   3  -5    2.77    0.29
   5   3   5    2.67    0.21
  -5  -3   5    2.46    0.21
   5  -3  -5    2.46    0.16
   6  -3   5   21.30    0.57
  -6  -3  -5   20.71    0.64
   6   3  -5   20.80    0.54
   6   3   5   20.94    0.58
   6  -3  -5   20.76    0.53
  -6   3  -5   21.55    0.67
  -6  -3   5   20.52    0.60
  -7  -3  -5   -0.06    0.13
   7  -3   5   -0.02    0.10
  -7   3  -5    0.01    0.15
   7   3   5   -0.04    0.10
  -7  -3   5   -0.01    0.11
   0  -4  -5   72.53    1.59
   0  -4   5   70.85    1.60
   1  -4   5   27.92    0.64
   1   4  -5   27.14    0.65
   1  -4  -5   26.99    0.65
   2  -4   5   21.94    0.53
   2   4  -5   21.80    0.55
   2  -4  -5   21.87    0.55
   3  -4   5   55.89    1.25
   3   4  -5   52.85    1.25
   3   4  -5   55.49    1.28
   3  -4   5   54.45    1.29
   3  -4  -5   54.09    1.28
   3  -4  -5   54.05    1.24
   4  -4   5    1.87    0.16
  -4  -4  -5    2.06    0.21
   4  -4   5    1.91    0.24
   4  -4   5    2.10    0.18
   4   4  -5    1.88    0.14
   4   4  -5    2.25    0.21
  -4  -4  -5    2.16    0.22
   4  -4   5    2.03    0.14
   4  -4   5    2.09    0.17
   4  -4  -5    1.95    0.13
   4  -4  -5    1.92    0.18
  -4   4  -5    2.31    0.27
  -4  -4   5    1.92    0.19
  -4  -4   5    1.97    0.19
  -4   4  -5    2.34    0.25
  -5  -4  -5   13.53    0.54
   5  -4   5   13.58    0.39
  -5  -4  -5   13.70    0.50
   5   4  -5   13.67    0.40
   5  -4   5   13.63    0.43
  -5   4  -5   12.48    0.55
   5  -4  -5   14.12    0.39
  -5  -4   5   13.48    0.46
   5   4   5   13.98    0.46
  -5  -4   5   13.26    0.46
   6   4  -5    3.07    0.17
  -6  -4  -5    3.10    0.25
   6  -4   5    2.56    0.18
  -6  -4   5    2.72    0.20
   6   4   5    3.24    0.20
   6  -4  -5    2.99    0.16
  -6   4  -5    2.76    0.26
   7  -4   5    1.36    0.12
  -7  -4   5    1.36    0.13
   7   4   5    1.50    0.13
  -7   4  -5    1.52    0.17
   0  -5   5   21.26    0.51
   1  -5   5   33.00    0.76
   1   5  -5   32.47    0.77
   1  -5  -5   32.90    0.77
   2  -5   5    1.27    0.12
   2   5  -5    1.35    0.11
   2  -5   5    1.12    0.09
   2  -5  -5    1.28    0.09
   2  -5  -5    1.40    0.13
   2  -5  -5    1.19    0.11
   3   5  -5    0.00    0.11
   3  -5   5    0.02    0.08
   3  -5   5    0.08    0.10
   3  -5  -5    0.01    0.07
   3  -5  -5    0.13    0.11
   4  -5   5   30.78    0.86
   4  -5   5   29.98    0.76
  -4  -5  -5   29.80    0.83
  -4  -5  -5   30.49    0.81
   4   5  -5   30.57    0.75
   4  -5   5   31.49    0.80
   4  -5   5   30.07    0.77
   4  -5   5   31.03    0.74
   4  -5  -5   30.21    0.80
  -4  -5   5   29.96    0.80
  -4  -5   5   31.28    0.79
  -4   5  -5   31.05    0.89
   4  -5  -5   29.68    0.73
   5  -5   5    4.91    0.23
   5   5  -5    5.31    0.24
  -5  -5  -5    4.64    0.29
   5  -5   5    5.05    0.26
  -5  -5   5    4.89    0.26
  -5   5  -5    4.81    0.34
   5   5   5    5.11    0.30
  -5  -5   5    5.43    0.31
   5  -5  -5    4.79    0.22
   6  -5   5    0.39    0.13
   6   5  -5    0.33    0.11
  -6  -5  -5    0.23    0.19
   6  -5  -5    0.34    0.12
  -6  -5   5    0.46    0.14
   6   5   5    0.32    0.14
  -6   5  -5    0.36    0.19
   7  -5   5   13.61    0.37
  -7  -5   5   13.86    0.38
  -7   5  -5   13.74    0.42
   0  -6   5   49.68    1.13
   1  -6   5  200.17    4.42
   1  -6   5  196.57    4.44
  -1  -6  -5  201.12    4.41
   1   6  -5  199.32    4.42
   1  -6  -5  200.22    4.40
   1  -6  -5  200.36    4.44
   1  -6  -5  202.55    4.41
   2  -6   5   27.45    0.70
   2   6  -5   27.59    0.68
   2  -6   5   27.21    0.67
   2  -6  -5   27.92    0.65
   2  -6  -5   28.01    0.68
   2  -6  -5   27.23    0.70
  -3  -6  -5    1.44    0.20
   3   6  -5    1.77    0.17
   3  -6   5    1.47    0.13
   3  -6   5    1.58    0.15
   3  -6  -5    1.54    0.16
   3  -6  -5    1.30    0.15
   3  -6  -5    1.35    0.11
  -3  -6   5    1.71    0.17
  -4  -6  -5    8.95    0.41
   4  -6   5    8.85    0.34
   4  -6   5    9.76    0.44
  -4  -6  -5    9.05    0.37
   4  -6   5    8.99    0.30
   4  -6   5    9.49    0.37
   4   6  -5    9.34    0.32
   4  -6   5    8.90    0.34
   4  -6  -5    8.61    0.28
  -4  -6   5    9.31    0.36
  -4  -6   5    9.38    0.36
  -4   6  -5    8.44    0.46
   4  -6  -5    9.61    0.38
   5  -6   5   25.02    0.63
   5   6  -5   24.58    0.64
  -5  -6  -5   24.87    0.72
   5  -6   5   25.95    0.67
  -5   6  -5   24.68    0.78
   5  -6  -5   24.90    0.62
  -5  -6   5   25.08    0.69
  -5  -6   5   24.90    0.68
   5   6   5   24.39    0.68
   6  -6   5    0.18    0.12
  -6  -6  -5    0.13    0.17
   6   6  -5    0.09    0.10
   6   6   5    0.11    0.13
  -6  -6   5    0.12    0.14
  -6  -6   5    0.10    0.13
  -6   6  -5    0.13    0.18
   0  -7  -5    7.47    0.27
   0  -7   5    7.09    0.27
   0  -7   5    7.50    0.23
   0  -7  -5    7.18    0.22
  -1  -7  -5   22.96    0.59
  -1  -7  -5   22.46    0.55
   1  -7   5   22.19    0.59
   1   7  -5   22.35    0.56
   1  -7   5   22.44    0.55
   1  -7  -5   22.69    0.54
   1  -7  -5   21.86    0.59
   2  -7   5    3.37    0.20
   2   7  -5    3.37    0.18
   2  -7   5    3.26    0.17
   2  -7  -5    2.86    0.19
   2  -7  -5    3.31    0.19
   2  -7  -5    3.18    0.15
  -3  -7  -5   14.04    0.47
  -3  -7  -5   14.01    0.47
   3  -7   5   13.33    0.40
   3  -7   5   13.43    0.38
   3  -7   5   14.33    0.45
   3  -7   5   13.16    0.42
   3  -7  -5   13.49    0.44
   3  -7  -5   13.01    0.43
   3  -7  -5   13.43    0.37
  -3  -7   5   13.98    0.44
  -3  -7   5   13.64    0.44
   3  -7  -5   14.65    0.43
   4  -7   5    2.05    0.25
  -4  -7  -5    2.04    0.21
   4  -7   5    2.31    0.18
   4  -7   5    2.17    0.15
  -4  -7  -5    1.74    0.22
   4  -7   5    1.96    0.19
   4   7  -5    1.90    0.16
  -4   7  -5    1.75    0.27
  -4  -7   5    1.98    0.19
   4  -7  -5    1.94    0.14
  -4  -7   5    1.96    0.19
   4  -7  -5    2.32    0.19
   5  -7   5   18.21    0.48
   5   7  -5   17.81    0.49
  -5  -7  -5   18.31    0.58
   5  -7   5   18.78    0.52
   5  -7  -5   17.13    0.47
  -5  -7   5   18.80    0.55
   5   7   5   17.73    0.54
   5  -7  -5   17.10    0.51
  -5   7  -5   17.96    0.63
  -5  -7   5   18.25    0.54
  -6  -7  -5    1.06    0.17
   6  -7   5    0.74    0.11
   6  -7   5    0.96    0.13
   6   7  -5    0.90    0.12
  -6   7  -5    0.95    0.19
   6   7   5    0.98    0.14
  -6  -7   5    0.99    0.15
  -6  -7   5    0.71    0.14
   0  -8  -5   18.70    0.47
   0  -8   5   18.98    0.48
   0  -8   5   18.77    0.51
   0  -8  -5   18.74    0.52
   1  -8   5   62.47    1.42
   1  -8   5   60.98    1.46
  -1  -8  -5   60.80    1.41
   1   8  -5   63.04    1.44
  -1  -8  -5   62.81    1.45
   1  -8  -5   63.52    1.41
   1  -8  -5   61.25    1.46
   2  -8   5    0.55    0.12
  -2  -8  -5    0.54    0.20
   2   8  -5    0.53    0.13
   2  -8   5    0.50    0.10
   2  -8  -5    0.54    0.13
   2  -8  -5    0.41    0.12
   2  -8  -5    0.52    0.09
  -2  -8   5    0.45    0.14
   3  -8   5   42.60    1.03
   3  -8   5   42.85    1.10
  -3  -8  -5   44.32    1.07
   3  -8   5   42.50    1.03
   3  -8   5   41.91    1.00
  -3  -8  -5   42.73    1.08
   3  -8   5   43.84    1.08
   3  -8  -5   40.97    1.02
   3  -8  -5   41.14    1.00
  -3  -8   5   42.90    1.05
   3  -8  -5   43.41    0.99
  -3  -8   5   43.47    1.05
   3  -8  -5   40.22    1.04
   3  -8  -5   43.16    1.07
   4  -8   5    6.82    0.25
   4  -8   5    6.20    0.32
   4  -8   5    7.07    0.40
   4   8  -5    6.45    0.27
  -4  -8  -5    6.17    0.35
  -4  -8  -5    6.17    0.33
   4  -8   5    6.15    0.29
  -4  -8   5    6.46    0.32
   4  -8  -5    6.37    0.31
  -4   8  -5    6.24    0.37
   4  -8  -5    6.24    0.24
  -4  -8   5    6.73    0.32
  -5  -8  -5    9.76    0.42
   5   8  -5    9.76    0.32
   5  -8   5    9.73    0.30
   5  -8   5    9.84    0.34
  -5   8  -5    9.62    0.46
  -5  -8   5   10.00    0.38
   5  -8  -5    9.59    0.36
  -5  -8   5    9.99    0.37
   5  -8  -5    9.67    0.35
   5   8   5    9.93    0.37
   6  -8   5    5.07    0.19
   6  -8   5    5.21    0.22
  -6  -8  -5    4.82    0.27
  -6   8  -5    4.92    0.31
  -6  -8   5    4.82    0.24
   6   8   5    4.92    0.24
  -6  -8   5    5.30    0.24
   0  -9   5   13.07    0.40
   0  -9  -5   12.98    0.35
   0  -9   5   12.70    0.36
   0  -9  -5   11.72    0.40
   1  -9   5    7.55    0.26
  -1  -9  -5    7.42    0.32
  -1  -9  -5    7.37    0.26
   1   9  -5    7.15    0.28
  -1  -9  -5    7.24    0.30
   1  -9   5    6.50    0.29
   1  -9  -5    7.29    0.30
   1  -9  -5    7.72    0.33
   1  -9  -5    7.43    0.24
  -2  -9  -5   38.50    0.95
  -2  -9  -5   37.28    0.90
   2  -9   5   37.77    0.89
   2  -9   5   37.89    0.99
  -2  -9  -5   38.39    0.98
   2  -9   5   39.53    0.97
   2  -9   5   36.27    0.91
   2  -9  -5   37.13    0.89
  -2  -9   5   37.02    0.94
   2  -9  -5   38.73    0.97
   2  -9  -5   37.65    0.93
   2  -9  -5   38.68    0.89
  -2  -9   5   37.51    0.94
   3  -9   5    8.64    0.43
   3  -9   5    8.20    0.36
  -3  -9  -5    7.77    0.40
   3  -9   5    8.69    0.33
  -3  -9  -5    7.95    0.37
   3  -9   5    8.12    0.28
  -3  -9   5    8.19    0.34
   3  -9  -5    8.12    0.35
   3  -9  -5    8.22    0.29
   3  -9  -5    7.84    0.36
   3  -9  -5    8.68    0.34
  -3  -9   5    8.48    0.35
   3  -9  -5    8.75    0.28
  -4  -9  -5    4.10    0.28
  -4  -9  -5    5.05    0.28
   4  -9   5    4.53    0.30
   4   9  -5    4.73    0.25
   4  -9   5    4.43    0.21
   4  -9   5    4.91    0.25
  -4  -9   5    4.34    0.25
   4  -9  -5    4.37    0.22
  -4   9  -5    4.43    0.33
  -4  -9   5    4.07    0.24
   4  -9  -5    4.25    0.24
  -5  -9  -5    3.90    0.25
   5   9  -5    3.79    0.19
   5  -9   5    3.80    0.25
   5  -9   5    4.11    0.23
   5  -9   5    4.35    0.19
  -5   9  -5    4.34    0.30
   5   9   5    3.97    0.23
  -5  -9   5    4.49    0.27
  -5  -9   5    3.98    0.22
   5  -9  -5    3.98    0.22
   6  -9   5    2.36    0.14
   6  -9   5    2.29    0.11
  -6  -9  -5    2.14    0.17
   6   9   5    2.02    0.18
  -6  -9   5    2.50    0.15
  -6   9  -5    1.86    0.19
  -6  -9   5    2.31    0.16
   0 -10   5    1.56    0.20
   0 -10   5    1.39    0.14
   0 -10  -5    1.45    0.12
   0 -10  -5    1.27    0.16
   0 -10   5    1.65    0.17
   0 -10  -5    1.82    0.14
   0 -10  -5    1.69    0.17
  -1 -10  -5   12.17    0.36
   1 -10   5   11.59    0.46
   1 -10   5   12.57    0.42
  -1 -10  -5   12.19    0.41
  -1 -10  -5   12.70    0.37
   1 -10   5   11.65    0.35
  -1 -10  -5   13.05    0.41
   1 -10   5   11.94    0.37
   1  10  -5   11.53    0.40
   1 -10  -5   12.34    0.35
   1 -10  -5   13.08    0.36
   1 -10  -5   12.60    0.42
  -1 -10   5   12.60    0.42
   1 -10  -5   12.03    0.40
   2 -10   5   25.41    0.67
   2 -10   5   25.24    0.64
  -2 -10  -5   27.07    0.70
   2 -10   5   26.72    0.72
  -2 -10  -5   25.18    0.73
   2 -10   5   24.75    0.74
  -2 -10  -5   26.33    0.65
  -2 -10   5   25.02    0.69
  -2 -10   5   25.33    0.69
   2 -10  -5   24.92    0.64
   2 -10  -5   25.98    0.68
   2 -10  -5   25.69    0.64
   2 -10  -5   26.72    0.72
  -3 -10  -5   13.31    0.47
   3 -10   5   13.61    0.47
   3 -10   5   14.59    0.43
   3 -10   5   13.23    0.39
   3 -10   5   14.02    0.53
  -3 -10  -5   13.56    0.50
  -3 -10   5   13.56    0.45
   3 -10  -5   13.90    0.48
   3 -10  -5   13.33    0.44
  -3 -10   5   13.55    0.46
   3 -10  -5   13.73    0.39
   3 -10  -5   14.01    0.39
  -4 -10  -5   15.32    0.51
   4 -10   5   15.53    0.52
   4 -10   5   16.35    0.47
   4 -10   5   15.68    0.43
   4  10  -5   15.72    0.45
  -4 -10  -5   16.66    0.54
   4 -10  -5   15.52    0.47
  -4  10  -5   15.67    0.60
  -4 -10   5   16.31    0.49
   4 -10  -5   15.13    0.51
  -4 -10   5   16.58    0.50
  -5 -10  -5    4.20    0.25
   5 -10   5    4.67    0.19
   5 -10   5    3.98    0.25
   5  10  -5    4.21    0.22
   5 -10   5    4.47    0.23
  -5 -10   5    4.26    0.26
   5 -10  -5    4.53    0.24
  -5  10  -5    4.43    0.29
  -5 -10   5    4.65    0.25
   5  10   5    4.33    0.25
   0 -11  -5    2.21    0.15
   0 -11  -5    2.26    0.18
   0 -11  -5    2.72    0.17
   0 -11   5    2.14    0.18
   0 -11   5    2.53    0.23
   0  11  -5    2.34    0.19
   0 -11  -5    2.03    0.19
   1 -11   5    5.14    0.29
  -1 -11  -5    4.84    0.22
   1 -11   5    4.68    0.22
   1 -11   5    4.49    0.26
  -1 -11  -5    4.47    0.25
  -1 -11  -5    4.74    0.30
   1 -11  -5    4.85    0.29
   1 -11  -5    4.75    0.22
   1 -11  -5    4.89    0.23
   1 -11  -5    5.04    0.30
  -1 -11   5    4.88    0.27
   2 -11   5   54.02    1.32
  -2 -11  -5   52.26    1.23
  -2 -11  -5   52.25    1.29
   2 -11   5   53.94    1.40
   2 -11   5   53.17    1.23
   2 -11  -5   52.64    1.23
   2 -11  -5   52.73    1.23
  -2 -11   5   52.63    1.28
  -2 -11   5   53.70    1.27
   2 -11  -5   53.09    1.31
   2 -11  -5   53.67    1.27
   3 -11   5    8.28    0.46
   3 -11   5    8.58    0.28
  -3 -11  -5    7.56    0.37
   3 -11   5    8.41    0.37
  -3 -11  -5    8.39    0.41
   3 -11   5    8.34    0.33
   3 -11  -5    8.02    0.34
   3 -11  -5    8.26    0.29
   3 -11  -5    8.50    0.37
  -3 -11   5    8.17    0.37
  -3 -11   5    7.98    0.35
   3 -11  -5    8.13    0.30
   4 -11   5    2.30    0.14
   4 -11   5    2.75    0.22
  -4 -11  -5    2.49    0.23
   4 -11   5    2.45    0.17
  -4 -11  -5    2.58    0.21
   4 -11  -5    2.84    0.23
   4 -11  -5    2.83    0.16
  -4 -11   5    2.50    0.19
  -4 -11   5    2.68    0.20
   4 -11  -5    2.40    0.19
  -4  11  -5    2.36    0.27
  -5 -11  -5    1.89    0.18
   5 -11   5    2.17    0.12
   5 -11   5    2.38    0.15
  -5 -11   5    2.19    0.18
   5  11   5    2.19    0.16
   5 -11  -5    2.48    0.16
  -5 -11   5    2.25    0.16
   0 -12  -5    0.93    0.14
   0 -12  -5    0.98    0.17
   0 -12  -5    0.73    0.12
   0 -12  -5    0.70    0.16
  -1 -12  -5    0.84    0.17
   1 -12   5    1.20    0.13
  -1 -12  -5    0.88    0.12
  -1 -12  -5    0.92    0.18
   1 -12   5    0.93    0.17
   1 -12  -5    1.01    0.16
   1 -12  -5    1.08    0.12
   1  12   5    1.15    0.19
   1 -12  -5    1.14    0.14
   1 -12  -5    1.09    0.18
  -2 -12  -5   12.84    0.39
   2 -12   5   13.94    0.47
   2 -12   5   13.57    0.38
  -2 -12  -5   13.39    0.47
   2 -12  -5   14.37    0.44
  -2 -12   5   12.82    0.44
   2 -12  -5   12.82    0.40
   2 -12  -5   13.69    0.39
   2 -12  -5   13.04    0.47
  -3 -12  -5   13.98    0.50
   3 -12   5   14.21    0.38
   3 -12   5   13.10    0.47
   3 -12   5   13.96    0.51
  -3 -12  -5   12.46    0.45
  -3 -12   5   13.45    0.46
   3 -12  -5   14.04    0.39
   3 -12  -5   13.59    0.47
  -3 -12   5   12.78    0.44
   3 -12  -5   13.78    0.43
  -4 -12  -5    1.15    0.17
   4 -12   5    1.05    0.11
   4 -12   5    0.99    0.17
  -4 -12  -5    1.20    0.19
   4 -12   5    1.05    0.14
   4 -12  -5    1.19    0.12
   4 -12  -5    0.79    0.14
  -4 -12   5    1.15    0.17
   4 -12  -5    0.87    0.19
  -4 -12   5    1.12    0.15
   5 -12   5    0.76    0.11
   5 -12   5    0.70    0.08
  -5 -12  -5    0.91    0.14
   5 -12  -5    0.71    0.12
  -5 -12   5    0.69    0.12
   0 -13  -5    1.41    0.13
   0 -13  -5    0.97    0.18
   0 -13  -5    1.12    0.17
  -1 -13  -5    5.07    0.27
   1 -13   5    4.69    0.30
   1 -13   5    4.59    0.22
  -1 -13  -5    4.89    0.23
   1 -13  -5    5.10    0.28
   1 -13  -5    4.79    0.25
   1 -13  -5    5.02    0.22
   1 -13  -5    5.18    0.30
   2 -13   5   12.64    0.46
   2 -13   5   13.61    0.38
  -2 -13  -5   13.71    0.45
   2 -13  -5   14.10    0.47
   2 -13  -5   13.43    0.43
   2 -13  -5   13.83    0.38
   2 -13  -5   12.67    0.40
   3 -13   5    1.60    0.18
   3 -13   5    1.65    0.12
  -3 -13  -5    1.21    0.18
  -3 -13  -5    1.37    0.23
   3 -13  -5    1.65    0.19
  -3 -13   5    1.50    0.17
   3 -13  -5    1.34    0.16
   3 -13  -5    1.75    0.13
  -4 -13  -5    2.98    0.21
   4 -13   5    3.29    0.15
  -4 -13  -5    2.85    0.19
   4 -13   5    3.71    0.18
   4 -13  -5    3.03    0.18
  -4 -13   5    3.36    0.18
   4 -13  -5    3.05    0.17
   0 -14  -5    0.93    0.17
   0 -14  -5    0.77    0.17
   0 -14  -5    0.82    0.12
  -1 -14  -5    4.23    0.25
  -1 -14  -5    4.73    0.22
   1 -14   5    4.46    0.30
   1 -14  -5    4.61    0.29
   1 -14  -5    4.69    0.27
   1 -14  -5    4.81    0.21
   2 -14   5    9.68    0.37
  -2 -14  -5    9.94    0.37
   2 -14   5    9.81    0.30
   2 -14  -5   10.29    0.35
   2 -14  -5    9.31    0.38
   2 -14  -5   10.39    0.31
   3 -14   5    1.27    0.17
   3 -14   5    1.60    0.11
  -3 -14  -5    1.58    0.17
   3 -14  -5    1.64    0.15
   3 -14  -5    1.63    0.19
   3 -14  -5    1.49    0.12
   4 -14   5    0.08    0.07
   4 -14  -5    0.12    0.10
   0 -15  -5    6.63    0.29
   0  15   5    6.21    0.32
   0 -15  -5    6.24    0.23
   0 -15  -5    5.66    0.32
  -1 -15  -5    4.59    0.20
  -1 -15  -5    4.94    0.27
   1 -15  -5    4.99    0.25
   1 -15  -5    4.17    0.27
   1 -15  -5    4.54    0.20
  -2 -15  -5    1.06    0.15
   2 -15   5    0.96    0.10
   2 -15  -5    0.96    0.22
   2 -15  -5    0.71    0.10
   2 -15  -5    0.91    0.14
   3 -15   5   13.78    0.35
  -3 -15  -5   13.29    0.39
   3 -15  -5   13.63    0.38
   3 -15  -5   13.91    0.35
   0 -16  -5    0.06    0.12
   0 -16  -5    0.16    0.09
  -1 -16  -5    8.19    0.30
   1 -16  -5    8.11    0.29
   1 -16  -5    8.10    0.25
  -2 -16  -5    1.64    0.15
   2 -16  -5    1.62    0.10
   2 -16  -5    1.61    0.14
   0   0  -6    3.25    0.13
  -1   0  -6    2.96    0.11
   1   0   6    3.01    0.10
   1   0  -6    3.14    0.14
   2   0  -6    0.12    0.08
   3   0  -6    3.32    0.19
   3   0   6    3.65    0.21
   3   0  -6    3.68    0.16
   4   0  -6   10.02    0.31
  -4   0  -6    9.26    0.47
   4   0  -6   10.67    0.38
  -5   0   6    6.62    0.35
   5   0  -6    6.67    0.26
   5   0   6    6.18    0.30
  -5   0  -6    6.05    0.37
   6   0   6    0.66    0.15
  -6   0  -6    0.77    0.21
   6   0  -6    0.84    0.12
  -6   0   6    0.50    0.16
   7   0   6    0.70    0.11
  -7   0   6    0.48    0.13
  -7   0  -6    0.75    0.15
   0   1  -6    4.78    0.15
   0  -1  -6    4.69    0.15
  -1  -1  -6    2.79    0.11
   1   1  -6    2.98    0.14
   1  -1   6    2.75    0.11
   1  -1  -6    2.77    0.14
   2  -1   6   69.67    1.58
   2   1  -6   72.73    1.62
   2  -1  -6   70.24    1.61
   3  -1   6   19.83    0.53
   3   1  -6   21.49    0.55
   3   1  -6   20.03    0.50
   3  -1  -6   20.13    0.49
   3  -1  -6   19.99    0.54
   3   1   6   19.13    0.53
   4   1  -6   53.77    1.23
   4  -1   6   53.28    1.27
  -4  -1  -6   54.57    1.37
  -4  -1  -6   52.92    1.33
   4   1  -6   55.22    1.30
   4  -1   6   50.08    1.23
  -4  -1   6   50.59    1.28
  -4   1  -6   53.73    1.35
   4  -1  -6   54.47    1.29
   4   1   6   54.13    1.27
   4  -1  -6   55.20    1.23
   5  -1   6   23.42    0.60
  -5   1   6   23.42    0.68
   5  -1   6   24.13    0.66
  -5  -1  -6   23.06    0.74
   5   1  -6   24.65    0.62
   5  -1  -6   24.78    0.61
   5   1   6   23.62    0.66
  -5  -1   6   23.37    0.67
  -5   1  -6   24.75    0.76
  -6  -1  -6    2.16    0.24
  -6   1   6    1.70    0.19
   6  -1   6    2.02    0.17
   6   1  -6    1.98    0.15
   6   1   6    2.26    0.18
   6  -1  -6    1.90    0.14
  -6   1  -6    2.22    0.25
  -6  -1   6    1.87    0.19
   7  -1   6    0.45    0.11
  -7  -1  -6    0.59    0.15
  -7   1  -6    0.61    0.15
   7   1   6    0.28    0.11
  -7  -1   6    0.52    0.12
   0  -2   6    0.03    0.04
   0  -2  -6   -0.02    0.05
   0   2  -6    0.04    0.05
   1   2  -6   23.11    0.56
   1  -2   6   22.82    0.54
   1  -2  -6   23.23    0.56
   2   2  -6   44.31    1.02
   2  -2   6   42.35    0.98
   2  -2  -6   43.26    1.01
   3  -2   6    8.30    0.25
   3   2  -6    7.63    0.25
   3   2  -6    8.44    0.30
   3  -2   6    7.89    0.29
   3  -2  -6    7.83    0.24
   3  -2  -6    8.55    0.30
  -4  -2  -6    1.11    0.27
   4   2  -6    1.58    0.13
   4  -2   6    1.54    0.13
   4  -2   6    1.26    0.15
  -4  -2  -6    1.07    0.20
   4   2  -6    1.26    0.18
   4  -2  -6    1.32    0.17
   4   2   6    1.46    0.17
   4   2   6    1.39    0.14
  -4  -2   6    1.33    0.18
  -4   2  -6    1.32    0.25
  -4   2  -6    1.39    0.18
   4  -2  -6    1.37    0.12
  -5  -2  -6   10.57    0.50
   5  -2   6   10.99    0.39
   5  -2   6   10.29    0.34
   5   2  -6   11.09    0.35
  -5  -2   6   10.66    0.41
   5   2   6   11.04    0.40
  -5   2  -6   11.63    0.51
   5  -2  -6   11.14    0.34
   6  -2   6    3.00    0.20
  -6  -2  -6    3.11    0.26
   6   2  -6    3.11    0.17
   6  -2  -6    2.99    0.16
   6   2   6    3.00    0.20
  -6   2  -6    2.87    0.27
  -6  -2   6    3.10    0.21
   7  -2   6    0.95    0.11
  -7  -2  -6    0.76    0.15
  -7   2  -6    1.03    0.16
   7   2   6    1.01    0.12
  -7  -2   6    1.01    0.13
   0  -3  -6  236.53    5.28
   0  -3   6  244.46    5.28
   1   3  -6   52.14    1.19
   1  -3   6   52.17    1.18
   1  -3  -6   52.49    1.19
   2   3  -6   29.85    0.72
   2  -3   6   29.72    0.69
   2  -3   6   28.05    0.72
   2  -3  -6   29.94    0.72
   2  -3  -6   28.85    0.68
   3   3  -6    4.32    0.24
   3  -3   6    4.44    0.22
   3  -3   6    4.22    0.18
   3   3  -6    4.11    0.18
   3  -3  -6    5.17    0.24
   3  -3  -6    4.29    0.17
   4   3  -6    2.47    0.22
  -4  -3  -6    2.83    0.24
   4  -3   6    2.68    0.15
   4   3  -6    2.51    0.16
   4  -3   6    2.49    0.19
   4  -3   6    2.73    0.20
  -4  -3  -6    3.10    0.22
   4   3   6    2.92    0.21
  -4  -3   6    2.60    0.20
   4  -3  -6    2.42    0.14
   4  -3  -6    2.64    0.21
  -4   3  -6    2.72    0.21
  -4  -3   6    2.52    0.20
  -4   3  -6    2.33    0.28
   5  -3   6   14.12    0.41
  -5  -3  -6   14.53    0.53
   5   3  -6   14.58    0.42
   5  -3   6   14.43    0.46
  -5  -3  -6   13.23    0.56
   5  -3  -6   14.77    0.41
  -5  -3   6   14.71    0.48
   5   3   6   14.88    0.47
  -5   3  -6   15.22    0.58
  -6  -3  -6    9.22    0.42
   6  -3   6    9.81    0.34
   6   3  -6    9.24    0.31
  -6  -3   6    9.34    0.36
   6   3   6    9.74    0.35
  -6   3  -6    9.58    0.45
   6  -3  -6    9.35    0.30
   7  -3   6    6.30    0.23
  -7  -3   6    6.09    0.24
  -7   3  -6    6.13    0.30
   7   3   6    6.42    0.23
   0  -4   6   12.79    0.33
   1  -4   6   26.34    0.62
   1   4  -6   25.74    0.63
   1  -4  -6   26.25    0.63
   2   4  -6   52.97    1.22
   2  -4   6   52.08    1.23
   2  -4   6   51.89    1.20
   2  -4  -6   52.41    1.18
   2  -4  -6   52.62    1.22
   3  -4   6    2.12    0.16
   3  -4   6    1.72    0.12
   3   4  -6    1.74    0.16
   3   4  -6    1.91    0.13
   3  -4  -6    1.53    0.11
   3  -4  -6    1.72    0.15
  -4  -4  -6   16.55    0.56
   4   4  -6   17.43    0.46
   4  -4   6   16.27    0.45
   4  -4   6   16.37    0.50
  -4  -4  -6   16.87    0.53
   4  -4   6   17.48    0.52
   4   4  -6   17.20    0.55
   4  -4   6   17.39    0.58
  -4   4  -6   17.12    0.52
  -4  -4   6   17.31    0.51
   4  -4  -6   16.34    0.52
   4  -4  -6   17.40    0.44
  -4   4  -6   17.54    0.62
  -4  -4   6   17.07    0.52
   5   4  -6    1.90    0.16
  -5  -4  -6    2.08    0.24
   5  -4   6    1.87    0.18
   5  -4   6    2.07    0.15
   5   4   6    1.87    0.19
  -5  -4   6    1.98    0.20
  -5   4  -6    1.85    0.27
   5  -4  -6    1.68    0.14
  -5  -4   6    1.94    0.20
   6   4  -6    3.00    0.17
   6  -4   6    3.10    0.19
   6  -4  -6    2.78    0.15
   6   4   6    2.91    0.19
  -6   4  -6    2.78    0.26
  -6  -4   6    2.95    0.20
   7  -4   6    3.06    0.17
  -7  -4   6    3.33    0.19
  -7   4  -6    3.08    0.20
   7   4   6    2.77    0.15
   0  -5   6   10.76    0.29
   1   5  -6    4.38    0.18
   1  -5   6    4.56    0.20
   1  -5   6    4.18    0.16
   1  -5  -6    4.35    0.15
   1  -5  -6    4.13    0.20
   1  -5  -6    4.48    0.18
   2  -5   6    7.90    0.24
   2  -5   6    7.29    0.27
   2   5  -6    7.75    0.27
   2  -5  -6    7.58    0.22
   2  -5  -6    7.16    0.28
   2  -5  -6    7.70    0.27
   2   5   6    7.73    0.28
  -3  -5  -6    0.70    0.18
   3   5  -6    0.63    0.14
   3   5  -6    0.79    0.11
   3  -5   6    0.54    0.10
   3  -5   6    0.62    0.12
   3  -5  -6    0.78    0.14
   3  -5  -6    0.64    0.09
  -3  -5   6    0.61    0.14
   4  -5   6    5.52    0.23
   4  -5   6    5.77    0.33
  -4  -5  -6    5.94    0.32
   4   5  -6    5.85    0.32
   4   5  -6    5.64    0.24
  -4  -5  -6    5.74    0.31
   4  -5   6    5.13    0.30
   4  -5   6    5.14    0.32
   4  -5   6    5.42    0.28
   4  -5  -6    5.83    0.22
  -4  -5   6    5.35    0.30
  -4  -5   6    5.52    0.29
  -4   5  -6    5.80    0.36
   4  -5  -6    6.05    0.33
   5  -5   6    1.14    0.13
   5   5  -6    1.01    0.14
   5  -5   6    1.16    0.15
  -5  -5  -6    1.08    0.21
  -5   5  -6    1.13    0.24
  -5  -5   6    0.95    0.17
   5   5   6    1.13    0.17
   5  -5  -6    0.96    0.12
  -5  -5   6    1.56    0.18
   6  -5   6    1.50    0.15
   6   5  -6    1.60    0.14
  -6  -5  -6    1.65    0.21
   6   5   6    1.80    0.16
   6  -5  -6    1.63    0.13
  -6  -5   6    1.45    0.16
  -6   5  -6    1.29    0.22
   0  -6  -6  149.03    3.29
   0  -6   6  148.19    3.30
   0  -6  -6  149.74    3.33
   1  -6   6   47.77    1.08
  -1  -6  -6   47.08    1.07
   1   6  -6   47.51    1.10
   1  -6   6   47.74    1.12
  -1  -6  -6   47.29    1.11
   1  -6  -6   46.53    1.12
   1  -6  -6   45.93    1.08
   1  -6  -6   46.05    1.06
   1   6   6   46.78    1.11
   2  -6   6    6.84    0.27
   2  -6   6    7.02    0.23
   2   6  -6    6.63    0.26
   2  -6  -6    7.08    0.28
   2  -6  -6    6.87    0.27
   2   6   6    7.10    0.28
   2  -6  -6    6.62    0.22
  -3  -6  -6    5.65    0.28
   3  -6   6    4.92    0.21
   3   6  -6    5.54    0.30
   3  -6   6    5.17    0.27
   3   6  -6    5.29    0.22
   3  -6   6    5.09    0.30
  -3  -6  -6    5.34    0.29
   3  -6   6    5.55    0.23
   3  -6  -6    5.05    0.27
   3  -6  -6    5.08    0.28
  -3  -6   6    4.94    0.27
  -3  -6   6    5.04    0.27
   3  -6  -6    4.84    0.19
   4  -6   6   15.67    0.57
   4   6  -6   15.33    0.44
   4  -6   6   15.93    0.43
   4  -6   6   15.54    0.47
   4  -6   6   15.14    0.50
  -4  -6  -6   16.25    0.51
  -4  -6  -6   15.79    0.54
   4  -6   6   15.20    0.48
  -4  -6   6   16.27    0.49
  -4   6  -6   15.49    0.60
   4  -6  -6   15.60    0.42
  -4  -6   6   16.07    0.49
   5  -6   6    9.40    0.30
  -5  -6  -6    9.68    0.43
   5  -6   6    9.60    0.34
   5   6  -6    9.60    0.32
  -5   6  -6   10.31    0.49
   5  -6  -6    8.90    0.29
   5   6   6    8.58    0.36
  -5  -6   6    8.79    0.37
  -5  -6   6    9.24    0.38
   6   6  -6    1.32    0.13
   6  -6   6    1.27    0.11
  -6  -6  -6    1.32    0.19
   6  -6   6    1.33    0.14
  -6  -6   6    1.45    0.15
  -6  -6   6    1.41    0.16
  -6   6  -6    1.26    0.21
   6   6   6    1.35    0.15
   6  -6  -6    1.27    0.13
   0  -7  -6    4.48    0.17
   0  -7   6    4.75    0.18
   0  -7   6    4.35    0.23
   0  -7  -6    4.75    0.22
  -1  -7  -6    9.33    0.32
   1  -7   6    8.94    0.32
   1   7  -6    9.38    0.30
  -1  -7  -6    8.97    0.27
   1  -7   6    9.24    0.28
   1  -7  -6    9.51    0.32
   1   7   6    9.30    0.32
   1  -7  -6    9.26    0.26
   2  -7   6    3.45    0.18
   2  -7   6    2.85    0.19
   2   7  -6    3.34    0.19
   2   7   6    3.86    0.22
   2  -7  -6    3.74    0.16
   2  -7  -6    2.96    0.20
  -2  -7   6    4.57    0.28
   2  -7  -6    3.37    0.19
   3  -7   6   20.25    0.52
  -3  -7  -6   19.89    0.54
   3   7  -6   20.96    0.53
   3  -7   6   20.03    0.64
   3  -7   6   19.92    0.56
   3  -7   6   21.56    0.60
  -3  -7  -6   21.35    0.60
   3   7  -6   19.91    0.60
   3  -7   6   19.47    0.55
  -3  -7  -6   20.92    0.63
  -3  -7   6   20.45    0.57
   3  -7  -6   19.40    0.56
   3  -7  -6   21.19    0.59
   3  -7  -6   20.25    0.51
   3  -7  -6   20.62    0.58
  -3  -7   6   21.07    0.58
   4  -7   6   47.98    1.25
   4  -7   6   48.43    1.13
   4   7  -6   49.50    1.14
  -4  -7  -6   50.05    1.23
   4  -7   6   48.25    1.16
   4  -7   6   47.67    1.21
  -4  -7  -6   49.18    1.20
  -4  -7   6   48.52    1.19
   4  -7  -6   47.87    1.12
  -4  -7   6   48.92    1.18
  -4   7  -6   46.13    1.27
   5   7  -6    1.11    0.13
   5  -7   6    1.01    0.15
  -5  -7  -6    1.09    0.21
   5  -7   6    1.11    0.12
  -5  -7   6    1.26    0.16
   5   7   6    1.09    0.17
  -5   7  -6    1.53    0.25
   5  -7  -6    1.18    0.13
  -5  -7   6    1.30    0.17
  -6  -7  -6    1.09    0.17
   6  -7   6    1.15    0.13
   6  -7   6    1.18    0.11
  -6  -7   6    0.94    0.14
  -6  -7   6    1.06    0.14
  -6   7  -6    1.12    0.19
   6   7   6    1.25    0.14
   0  -8   6   41.23    0.95
   0  -8  -6   39.57    0.93
   0  -8   6   40.18    0.98
   0  -8  -6   40.07    0.99
   1  -8   6    1.99    0.13
  -1  -8  -6    1.76    0.13
  -1  -8  -6    1.88    0.16
   1  -8   6    1.89    0.16
   1   8  -6    2.04    0.15
   1  -8  -6    1.85    0.12
   1  -8  -6    1.69    0.16
   2  -8   6    0.19    0.17
   2  -8   6    0.12    0.12
   2  -8   6    0.15    0.10
  -2  -8  -6    0.18    0.19
  -2  -8  -6    0.16    0.11
  -2  -8  -6    0.21    0.15
   2  -8   6    0.11    0.09
   2   8  -6    0.25    0.13
   2  -8  -6    0.16    0.10
   2  -8  -6    0.06    0.12
   2  -8  -6    0.23    0.14
   2  -8  -6    0.09    0.09
  -2  -8   6    0.19    0.13
  -2  -8   6    0.30    0.13
   3  -8   6   11.49    0.34
  -3  -8  -6   11.51    0.49
   3  -8   6   10.75    0.38
   3  -8   6   11.08    0.39
  -3  -8  -6   11.36    0.42
   3  -8   6   11.96    0.43
  -3  -8  -6   12.48    0.46
   3  -8   6   11.39    0.48
   3   8  -6   11.30    0.36
  -3  -8   6   11.62    0.41
   3  -8  -6   12.03    0.34
   3  -8  -6   11.01    0.40
   3  -8  -6   12.60    0.43
  -3  -8   6   10.89    0.39
   3  -8  -6   11.24    0.42
  -4  -8  -6   16.09    0.52
   4   8  -6   14.63    0.44
  -4  -8  -6   15.57    0.54
   4  -8   6   15.39    0.51
   4  -8   6   15.63    0.56
   4  -8   6   15.43    0.46
   4  -8   6   15.77    0.43
   4  -8  -6   14.67    0.48
  -4  -8   6   15.19    0.49
  -4   8  -6   14.85    0.59
  -4  -8   6   15.99    0.49
   4  -8  -6   14.90    0.42
   5  -8   6    0.92    0.14
  -5  -8  -6    0.88    0.19
   5  -8   6    1.00    0.19
   5  -8   6    1.13    0.11
   5   8  -6    1.15    0.14
   5  -8  -6    1.15    0.13
   5   8   6    1.30    0.17
  -5  -8   6    0.81    0.15
  -5  -8   6    1.24    0.16
  -5   8  -6    0.94    0.22
   6  -8   6    2.27    0.14
   6  -8   6    2.05    0.12
  -6  -8  -6    2.29    0.18
  -6  -8   6    2.33    0.16
   6   8   6    2.18    0.15
  -6  -8   6    2.15    0.16
  -6   8  -6    2.12    0.20
   0  -9  -6    8.54    0.28
   0  -9   6    8.87    0.53
   0  -9  -6    7.83    0.32
   0  -9  -6    8.83    0.27
   0  -9   6    7.73    0.32
   0  -9   6    8.60    0.29
   0  -9  -6    8.86    0.33
   1  -9   6   41.28    1.03
  -1  -9  -6   43.26    0.98
  -1  -9  -6   42.09    1.03
   1   9  -6   44.16    1.02
  -1  -9  -6   41.22    1.02
   1  -9   6   41.13    0.99
   1  -9   6   40.73    1.05
  -1  -9  -6   40.90    0.97
   1  -9  -6   40.87    0.97
  -1  -9   6   39.82    1.01
   1  -9  -6   41.49    1.01
  -1  -9   6   41.99    1.02
   1   9   6   42.28    1.03
   1  -9  -6   40.64    1.04
   1  -9  -6   42.29    0.97
  -2  -9  -6    1.87    0.15
  -2  -9  -6    1.76    0.20
   2  -9   6    1.89    0.18
   2  -9   6    1.84    0.15
   2  -9   6    1.75    0.13
   2   9  -6    2.02    0.21
   2  -9   6    1.81    0.22
  -2  -9  -6    2.43    0.25
   2  -9  -6    2.09    0.14
   2  -9  -6    1.82    0.14
  -2  -9   6    2.07    0.18
   2  -9  -6    2.22    0.18
   2  -9  -6    1.60    0.18
  -2  -9   6    1.94    0.17
   3  -9   6    5.67    0.31
   3  -9   6    5.54    0.23
   3  -9   6    5.23    0.29
  -3  -9  -6    5.45    0.30
  -3  -9  -6    5.58    0.32
   3  -9   6    5.83    0.34
  -3  -9   6    5.07    0.31
  -3  -9   6    5.55    0.29
   3  -9  -6    5.39    0.25
   3  -9  -6    5.68    0.23
   3  -9  -6    5.47    0.32
   3  -9  -6    5.47    0.30
   4   9  -6    3.22    0.19
  -4  -9  -6    3.33    0.25
   4  -9   6    3.91    0.21
   4  -9   6    3.26    0.24
  -4  -9  -6    3.45    0.26
   4  -9   6    3.16    0.27
   4  -9   6    3.44    0.18
  -4  -9   6    3.72    0.23
   4  -9  -6    3.25    0.18
  -4   9  -6    2.97    0.29
  -4  -9   6    3.47    0.23
   4  -9  -6    3.59    0.22
   5  -9   6    0.32    0.09
   5  -9   6    0.32    0.17
   5   9  -6    0.36    0.12
  -5  -9  -6    0.37    0.17
   5  -9   6    0.24    0.12
  -5  -9   6    0.34    0.14
  -5   9  -6    0.17    0.20
   5   9   6    0.27    0.14
  -5  -9   6    0.25    0.13
   6  -9   6    0.21    0.09
  -6  -9  -6    0.19    0.13
  -6  -9   6    0.28    0.11
  -6  -9   6    0.35    0.15
  -6   9  -6    0.33    0.15
   0 -10  -6    0.18    0.11
   0 -10  -6    0.09    0.13
   0 -10   6    0.13    0.11
   0  10  -6    0.22    0.12
   0 -10   6   -0.02    0.19
   0 -10   6    0.13    0.15
   0 -10  -6    0.09    0.10
   0 -10  -6    0.13    0.13
   1 -10   6    6.87    0.29
   1 -10   6    7.86    0.37
  -1 -10  -6    7.52    0.27
  -1 -10  -6    7.36    0.33
   1  10  -6    6.98    0.33
  -1 -10  -6    7.45    0.33
   1 -10   6    7.90    0.33
  -1 -10  -6    7.93    0.28
   1 -10   6    7.37    0.26
   1 -10  -6    7.44    0.27
   1  10   6    7.96    0.33
  -1 -10   6    7.08    0.34
   1 -10  -6    7.62    0.33
   1 -10  -6    7.01    0.27
   1 -10  -6    7.39    0.32
   2 -10   6  107.57    2.53
   2 -10   6  108.36    2.43
  -2 -10  -6  107.59    2.44
  -2 -10  -6  107.95    2.51
   2 -10   6  108.48    2.51
  -2 -10  -6  112.58    2.50
  -2 -10   6  107.04    2.48
  -2 -10   6  107.96    2.47
   2 -10  -6  109.83    2.44
   2 -10  -6  104.88    2.46
   2 -10  -6  112.18    2.52
   2 -10  -6  107.72    2.44
   3 -10   6   11.41    0.42
  -3 -10  -6   10.68    0.46
   3 -10   6   11.57    0.48
   3 -10   6   11.19    0.34
  -3 -10  -6   11.15    0.43
   3 -10  -6   10.88    0.42
   3 -10  -6   10.88    0.35
  -3 -10   6   11.13    0.39
   3 -10  -6   11.17    0.34
  -3 -10   6   10.73    0.40
   3 -10  -6   10.38    0.39
   4 -10   6    5.34    0.22
  -4 -10  -6    5.08    0.29
   4 -10   6    4.78    0.26
   4 -10   6    5.25    0.31
  -4 -10  -6    5.52    0.31
  -4 -10   6    5.51    0.30
  -4  10  -6    5.33    0.35
   4 -10  -6    4.81    0.23
  -4 -10   6    5.58    0.28
   4 -10  -6    5.65    0.29
   5 -10   6    1.89    0.14
  -5 -10  -6    1.60    0.18
   5 -10   6    1.69    0.12
  -5 -10   6    1.94    0.17
  -5  10  -6    1.55    0.22
   5  10   6    1.63    0.16
  -5 -10   6    1.90    0.16
   5 -10  -6    1.80    0.16
   0 -11  -6    0.04    0.14
   0 -11  -6    0.15    0.12
   0 -11  -6    0.14    0.10
   0 -11  -6    0.04    0.14
   0 -11   6    0.08    0.16
   1 -11   6   17.04    0.46
  -1 -11  -6   17.82    0.54
  -1 -11  -6   17.62    0.47
   1 -11   6   17.41    0.54
  -1 -11  -6   17.31    0.53
   1 -11   6   16.40    0.56
   1  11   6   18.37    0.54
  -1 -11   6   16.91    0.54
   1 -11  -6   17.27    0.47
   1 -11  -6   16.70    0.46
   1 -11  -6   17.03    0.54
   1 -11  -6   17.19    0.51
   2 -11   6    4.44    0.29
  -2 -11  -6    4.64    0.27
  -2 -11  -6    4.23    0.23
   2 -11   6    4.45    0.21
   2 -11   6    3.99    0.29
  -2 -11   6    5.10    0.25
   2 -11  -6    4.60    0.29
   2 -11  -6    4.06    0.24
   2 -11  -6    4.34    0.23
   2 -11  -6    4.49    0.22
  -2 -11   6    4.75    0.26
   3 -11   6    8.97    0.37
   3 -11   6    8.23    0.44
   3 -11   6    8.73    0.29
  -3 -11  -6    8.75    0.42
  -3 -11  -6    8.47    0.38
   3 -11  -6    8.66    0.38
  -3 -11   6    8.45    0.36
   3 -11  -6    8.59    0.29
   3 -11  -6    7.93    0.30
  -3 -11   6    8.38    0.35
   3 -11  -6    8.48    0.34
  -4 -11  -6    2.51    0.22
   4 -11   6    2.50    0.17
  -4 -11  -6    2.04    0.19
   4 -11   6    2.45    0.14
   4 -11   6    2.65    0.22
  -4 -11   6    2.45    0.18
  -4  11  -6    2.52    0.26
   4 -11  -6    2.07    0.18
  -4 -11   6    2.66    0.20
   5 -11   6    5.73    0.19
   5 -11   6    5.26    0.23
  -5 -11  -6    5.46    0.27
  -5  11  -6    5.20    0.40
  -5 -11   6    5.54    0.26
  -5 -11   6    5.41    0.23
   5  11   6    5.67    0.24
   5 -11  -6    5.33    0.24
   0 -12  -6    0.26    0.15
   0 -12  -6   -0.07    0.14
   0 -12  -6    0.05    0.12
   0 -12   6    0.11    0.18
   0 -12  -6    0.03    0.10
  -1 -12  -6   22.20    0.57
   1 -12   6   21.42    0.69
  -1 -12  -6   21.79    0.64
   1 -12   6   21.36    0.64
  -1 -12  -6   22.70    0.64
   1 -12  -6   22.96    0.58
   1  12   6   22.41    0.65
   1 -12  -6   22.72    0.58
   1 -12  -6   21.96    0.65
  -1 -12   6   21.86    0.65
   1 -12  -6   22.67    0.62
  -2 -12  -6   23.45    0.61
   2 -12   6   21.94    0.72
   2 -12   6   24.12    0.60
   2 -12   6   25.32    0.69
  -2 -12  -6   23.51    0.67
   2 -12  -6   24.13    0.61
   2 -12  -6   24.40    0.69
  -2 -12   6   23.43    0.67
   2 -12  -6   24.56    0.66
  -2 -12   6   23.68    0.65
   2 -12  -6   23.83    0.62
   3 -12   6    5.06    0.30
  -3 -12  -6    5.72    0.32
  -3 -12  -6    4.96    0.29
   3 -12   6    5.55    0.21
   3 -12  -6    5.07    0.25
  -3  12  -6    5.12    0.34
  -3 -12   6    5.61    0.28
   3 -12  -6    4.93    0.27
   3 -12  -6    5.37    0.30
  -3 -12   6    5.42    0.31
   3 -12  -6    5.21    0.23
  -4 -12  -6    6.11    0.32
  -4 -12  -6    6.48    0.29
   4 -12   6    5.88    0.30
   4 -12   6    6.52    0.22
  -4 -12   6    6.77    0.30
  -4 -12   6    6.69    0.28
   4 -12  -6    6.49    0.27
   5 -12   6    0.10    0.06
  -5 -12   6    0.13    0.10
   0 -13  -6    0.10    0.15
   0 -13  -6    0.08    0.15
   0 -13  -6    0.15    0.11
  -1 -13  -6    2.98    0.17
   1 -13   6    2.88    0.23
  -1 -13  -6    3.18    0.22
   1  13   6    3.32    0.25
   1 -13  -6    2.35    0.22
   1 -13  -6    2.97    0.21
   1 -13  -6    3.10    0.19
   1 -13  -6    2.94    0.17
   2 -13   6    1.98    0.19
   2 -13   6    2.02    0.13
  -2 -13  -6    1.60    0.14
  -2 -13  -6    2.03    0.20
   2 -13  -6    1.78    0.17
   2 -13  -6    1.78    0.18
   2 -13  -6    1.58    0.20
   2 -13  -6    1.79    0.14
  -3 -13  -6   28.31    0.73
   3 -13   6   28.11    0.67
   3 -13   6   28.27    0.75
   3 -13  -6   27.17    0.75
  -3 -13   6   27.58    0.71
   3 -13  -6   28.32    0.71
   3 -13  -6   28.30    0.68
  -4 -13  -6    3.27    0.19
   4 -13   6    3.61    0.15
  -4 -13  -6    3.38    0.21
   4  13   6    3.53    0.19
   4 -13  -6    3.55    0.21
  -4 -13   6    3.70    0.21
   0 -14  -6    2.64    0.20
   0 -14  -6    2.53    0.15
   0  14   6    2.93    0.23
   0 -14  -6    2.23    0.21
   1 -14   6    1.16    0.18
  -1 -14  -6    1.10    0.12
  -1 -14  -6    1.28    0.17
   1 -14  -6    0.99    0.16
   1 -14  -6    1.01    0.17
   1 -14  -6    1.03    0.12
   2 -14   6    1.98    0.19
  -2 -14  -6    2.31    0.19
   2 -14   6    2.17    0.13
   2 -14  -6    1.95    0.20
   2 -14  -6    2.19    0.18
   2 -14  -6    2.30    0.14
   3 -14   6    6.22    0.20
  -3 -14  -6    5.86    0.27
   3 -14  -6    6.05    0.25
   3 -14  -6    6.37    0.22
   0 -15  -6    4.06    0.22
   0  15   6    4.09    0.25
   0 -15  -6    4.37    0.19
  -1 -15  -6   10.08    0.35
  -1 -15  -6    9.19    0.29
  -1  15   6    9.70    0.36
   1 -15  -6    9.89    0.34
   1 -15  -6   10.02    0.29
   1 -15  -6    9.18    0.36
   2 -15   6    3.00    0.15
  -2 -15  -6    2.82    0.18
   2 -15  -6    2.83    0.16
   2 -15  -6    2.72    0.17
   3 -15   6    2.58    0.13
   3 -15  -6    2.74    0.15
   3 -15  -6    2.48    0.14
   0 -16  -6    3.08    0.15
   0 -16  -6    2.78    0.17
  -1 -16  -6    1.24    0.10
  -1 -16  -6    1.06    0.13
   1 -16  -6    1.27    0.14
   1 -16  -6    1.16    0.10
   0   0  -7   -0.03    0.06
  -1   0  -7    0.06    0.06
   1   0  -7   -0.01    0.07
   2   0   7   61.03    1.43
   2   0  -7   62.90    1.43
   3   0  -7    2.44    0.18
   3   0  -7    2.38    0.13
   3   0   7    2.99    0.18
   4   0  -7    0.33    0.10
  -4   0   7    0.42    0.17
   4   0   7    0.38    0.11
   4   0  -7    0.33    0.17
   4   0   7    0.33    0.13
  -4   0  -7    0.33    0.23
  -5   0  -7    6.36    0.38
   5   0   7    6.42    0.30
  -5   0   7    5.56    0.33
   5   0   7    5.78    0.25
   5   0  -7    6.19    0.25
   6   0  -7    4.46    0.21
  -6   0  -7    4.38    0.29
   6   0   7    5.05    0.26
  -6   0   7    4.72    0.29
   7   0   7    2.75    0.14
  -7   0  -7    2.22    0.18
   0  -1  -7    6.47    0.20
   0   1  -7    6.54    0.20
   1  -1   7   42.85    0.97
   1   1  -7   43.55    0.99
  -1   1  -7   41.74    0.97
   1  -1  -7   43.16    0.99
   2   1  -7    2.43    0.15
   2  -1   7    2.03    0.14
   2  -1   7    1.82    0.10
   2   1   7    1.69    0.13
   2  -1  -7    1.92    0.11
   2  -1  -7    1.96    0.14
   3   1  -7    5.79    0.21
   3  -1   7    5.79    0.26
   3   1  -7    6.07    0.27
   3   1   7    5.48    0.25
   3  -1  -7    6.06    0.27
   3  -1  -7    6.11    0.21
   4  -1   7   16.02    0.44
  -4  -1  -7   15.33    0.59
   4  -1   7   16.29    0.48
  -4  -1  -7   16.23    0.56
   4   1  -7   15.59    0.52
   4   1  -7   16.85    0.44
   4  -1  -7   15.97    0.52
   4   1   7   16.26    0.48
  -4   1  -7   16.33    0.62
   4   1   7   16.18    0.44
   4  -1  -7   16.81    0.44
  -4  -1   7   16.15    0.51
   5  -1   7    1.33    0.16
  -5  -1  -7    1.12    0.25
   5   1  -7    1.23    0.14
   5  -1   7    1.25    0.13
   5   1   7    1.39    0.17
  -5  -1   7    0.96    0.18
   5  -1  -7    1.08    0.13
  -5   1  -7    0.93    0.24
   6   1  -7    7.56    0.27
  -6  -1  -7    7.72    0.40
   6  -1   7    8.70    0.31
   6  -1  -7    8.15    0.27
  -6   1  -7    8.96    0.43
   6   1   7    8.21    0.32
  -6  -1   7    8.06    0.33
  -7  -1  -7    1.92    0.17
   7  -1   7    2.05    0.13
   7   1   7    2.31    0.14
  -7   1  -7    1.85    0.17
   0   2  -7   70.46    1.55
   0  -2  -7   67.45    1.54
   1   2  -7   47.08    1.06
   1  -2   7   45.52    1.04
   1  -2  -7   44.33    1.05
   2  -2   7   44.93    0.99
   2   2  -7   43.66    1.03
   2  -2   7   43.54    1.03
   2  -2  -7   42.24    1.03
   2  -2  -7   42.96    0.99
   2   2   7   42.87    1.03
   3   2  -7    7.97    0.26
   3   2  -7    8.70    0.32
   3  -2   7    8.00    0.30
   3  -2  -7    8.25    0.25
   3   2   7    7.75    0.30
   3  -2  -7    8.07    0.32
   4  -2   7    8.30    0.34
   4  -2   7    7.98    0.28
   4  -2   7    8.29    0.33
  -4  -2  -7    8.20    0.42
   4   2  -7    8.18    0.28
   4   2  -7    8.38    0.38
   4  -2  -7    8.59    0.28
  -4   2  -7    8.42    0.35
  -4   2  -7    8.20    0.47
   4   2   7    8.15    0.29
  -4  -2   7    8.16    0.34
   4  -2  -7    7.79    0.36
   4   2   7    8.47    0.33
   5   2  -7   12.37    0.38
   5  -2   7   13.05    0.37
   5  -2   7   12.18    0.41
  -5  -2  -7   13.06    0.57
  -5  -2  -7   11.52    0.53
  -5   2  -7   13.13    0.55
  -5  -2   7   11.79    0.43
   5  -2  -7   12.84    0.37
   5   2   7   12.36    0.42
  -6  -2  -7   11.85    0.47
   6   2  -7   12.41    0.36
   6  -2   7   11.97    0.39
   6  -2  -7   12.37    0.35
  -6   2  -7   11.90    0.49
   6   2   7   12.52    0.40
  -6  -2   7   11.90    0.40
   7  -2   7    2.33    0.13
  -7   2  -7    2.54    0.18
  -7  -2   7    2.21    0.15
   7   2   7    2.30    0.14
   0   3  -7   53.59    1.19
   0  -3  -7   49.16    1.21
   0  -3   7   53.32    1.18
   1  -3   7   84.84    1.87
   1   3  -7   82.51    1.89
   1  -3  -7   83.92    1.88
   2   3  -7   12.99    0.37
   2  -3   7   12.29    0.33
   2  -3   7   12.17    0.37
   2  -3  -7   12.33    0.32
   2  -3  -7   12.46    0.37
   2   3   7   12.39    0.37
   3   3  -7    5.08    0.20
   3   3  -7    5.30    0.26
   3  -3   7    4.92    0.20
   3  -3   7    4.70    0.25
   3  -3  -7    4.97    0.25
   3  -3  -7    4.91    0.19
   4  -3   7   -0.01    0.19
   4  -3   7    0.07    0.14
   4   3  -7   -0.04    0.18
  -4  -3  -7    0.10    0.16
   4   3  -7    0.01    0.10
  -4  -3  -7    0.21    0.18
   4  -3   7    0.02    0.10
   4  -3   7    0.07    0.13
  -4   3  -7    0.13    0.17
  -4   3  -7    0.02    0.22
   4  -3  -7    0.25    0.17
   4  -3  -7    0.11    0.10
   4   3   7    0.02    0.13
  -4  -3   7    0.06    0.15
   4   3   7    0.13    0.11
  -4  -3   7    0.07    0.14
   5  -3   7    2.88    0.20
   5  -3   7    3.23    0.17
   5   3  -7    2.73    0.17
  -5  -3  -7    2.83    0.27
   5  -3  -7    3.35    0.17
   5   3   7    2.62    0.21
  -5   3  -7    2.99    0.30
  -5  -3   7    2.97    0.22
   6   3  -7    0.81    0.12
   6  -3   7    1.11    0.14
  -6   3  -7    0.83    0.21
   6   3   7    1.22    0.16
  -6  -3   7    1.05    0.16
   6  -3  -7    0.84    0.12
   7  -3   7    3.75    0.18
   7   3   7    3.80    0.18
  -7   3  -7    3.79    0.21
  -7  -3   7    3.82    0.25
   0   4  -7   10.08    0.29
   0  -4   7   10.06    0.28
   1  -4   7   45.14    1.05
   1   4  -7   44.71    1.03
   1  -4   7   45.16    1.01
   1  -4  -7   43.75    1.05
   1   4   7   43.35    1.04
   1  -4  -7   43.96    1.00
   1  -4  -7   42.56    1.02
   2   4  -7    3.32    0.18
   2  -4   7    2.85    0.15
   2  -4   7    2.79    0.18
   2  -4  -7    3.01    0.14
   2  -4  -7    3.25    0.21
   2  -4  -7    3.04    0.17
   2   4   7    3.37    0.20
   3   4  -7    2.12    0.19
   3  -4   7    1.79    0.16
  -3  -4  -7    1.94    0.21
   3   4  -7    1.89    0.13
   3  -4   7    2.28    0.14
  -3  -4   7    2.17    0.17
   3  -4  -7    1.80    0.17
   3  -4  -7    1.93    0.12
   4  -4   7   20.73    0.60
   4   4  -7   21.52    0.55
   4   4  -7   22.50    0.65
   4  -4   7   20.94    0.67
  -4  -4  -7   21.17    0.64
  -4  -4  -7   21.24    0.62
   4  -4   7   20.83    0.54
   4  -4   7   20.42    0.57
  -4  -4   7   19.92    0.59
   4  -4  -7   21.49    0.62
   4   4   7   20.50    0.60
   4   4   7   19.87    0.54
   4  -4  -7   21.47    0.53
  -4  -4   7   20.99    0.59
  -4   4  -7   20.97    0.70
  -4   4  -7   20.69    0.59
   5  -4   7    4.16    0.23
   5  -4   7    4.12    0.21
   5   4  -7    4.30    0.23
  -5  -4  -7    4.60    0.30
  -5  -4   7    4.11    0.25
   5  -4  -7    4.78    0.22
  -5   4  -7    4.64    0.34
  -5  -4   7    4.07    0.24
   5   4   7    4.50    0.25
   6  -4   7    1.93    0.16
   6  -4   7    2.27    0.14
   6   4  -7    2.11    0.15
   6  -4  -7    2.36    0.14
  -6  -4   7    2.16    0.18
  -6   4  -7    1.86    0.23
   6   4   7    2.08    0.17
   0  -5  -7   43.29    0.99
   0   5  -7   44.23    1.02
   0  -5  -7   44.11    1.04
   0  -5   7   43.42    1.01
  -1  -5  -7   12.44    0.34
   1  -5   7   12.24    0.38
   1  -5   7   13.23    0.34
   1   5   7   12.61    0.38
   1  -5  -7   13.07    0.35
   1  -5  -7   12.30    0.33
   1  -5  -7   13.09    0.39
   2  -5   7    1.07    0.10
   2  -5   7    1.12    0.13
   2   5  -7    1.22    0.13
   2  -5  -7    1.17    0.13
   2   5   7    1.41    0.14
   2  -5  -7    1.20    0.09
   2  -5  -7    1.39    0.15
   3   5  -7    7.05    0.32
   3   5  -7    6.88    0.25
   3  -5   7    7.15    0.30
   3  -5   7    6.93    0.25
  -3  -5  -7    6.75    0.33
   3  -5   7    7.01    0.26
   3  -5   7    7.52    0.39
  -3  -5  -7    7.08    0.36
   3  -5  -7    7.26    0.23
  -3   5  -7    7.68    0.33
  -3  -5   7    6.97    0.30
  -3  -5   7    7.02    0.31
   3  -5  -7    7.00    0.31
   3   5   7    6.90    0.36
   4  -5   7   10.51    0.40
  -4  -5  -7    9.92    0.45
   4  -5   7   10.94    0.33
   4   5  -7   11.17    0.35
  -4  -5  -7   10.96    0.43
   4   5  -7   10.05    0.48
   4  -5   7   11.81    0.48
   4  -5   7   10.80    0.37
  -4   5  -7   10.83    0.52
  -4   5  -7   10.52    0.42
  -4  -5   7   10.77    0.39
  -4  -5   7   10.46    0.40
   4  -5  -7   11.05    0.32
   4  -5  -7   12.50    0.63
  -5  -5  -7    5.59    0.32
   5   5  -7    6.27    0.25
   5  -5   7    6.13    0.25
   5  -5   7    5.95    0.28
   5  -5  -7    6.39    0.24
   5   5   7    6.37    0.31
  -5  -5   7    6.02    0.32
  -5   5  -7    5.62    0.36
  -5  -5   7    5.94    0.31
   6   5  -7   -0.03    0.10
   6  -5   7   -0.08    0.11
  -6  -5  -7   -0.10    0.17
   6  -5   7   -0.11    0.09
  -6  -5   7    0.22    0.12
   6   5   7    0.06    0.12
  -6   5  -7    0.01    0.17
   6  -5  -7   -0.09    0.10
   0  -6  -7   13.37    0.40
   0  -6   7   13.36    0.39
   0  -6   7   13.71    0.37
   0  -6  -7   13.90    0.35
  -1  -6  -7   78.77    1.81
   1   6  -7   79.91    1.84
   1  -6   7   81.47    1.86
   1  -6   7   80.65    1.82
   1  -6  -7   81.55    1.86
   1  -6  -7   81.31    1.80
   1   6   7   80.67    1.86
   2  -6   7   33.40    0.82
   2  -6   7   34.80    0.86
   2   6  -7   34.17    0.85
   2   6   7   34.84    0.85
   2  -6  -7   33.71    0.85
   2  -6  -7   33.67    0.84
   2  -6  -7   34.24    0.80
   3  -6   7   11.21    0.39
   3  -6   7   10.93    0.35
   3  -6   7   10.58    0.39
   3  -6   7   10.74    0.32
  -3  -6  -7   10.79    0.43
  -3  -6  -7   10.88    0.34
   3   6  -7   10.95    0.41
  -3  -6  -7   10.60    0.41
   3   6  -7   11.26    0.33
  -3  -6   7   10.75    0.39
  -3   6  -7   10.18    0.41
  -3  -6   7   10.55    0.37
   3  -6  -7   10.99    0.31
   3  -6  -7   11.09    0.40
   3   6   7   10.49    0.33
   3  -6  -7   10.66    0.42
   4  -6   7   33.46    0.92
   4  -6   7   32.30    0.79
   4  -6   7   31.96    0.87
  -4  -6  -7   32.62    0.89
   4  -6   7   32.66    0.82
  -4  -6  -7   31.50    0.86
   4   6  -7   33.44    0.80
  -4  -6   7   33.43    0.85
   4  -6  -7   32.80    0.79
  -4   6  -7   32.27    0.95
  -4  -6   7   33.13    0.84
   5  -6   7   28.81    0.74
  -5  -6  -7   29.51    0.81
   5  -6   7   28.54    0.71
   5   6  -7   29.40    0.72
   5  -6  -7   29.35    0.71
   5   6   7   28.85    0.77
  -5  -6   7   29.18    0.76
  -5   6  -7   29.13    0.87
  -5  -6   7   29.17    0.77
   6   6  -7    1.65    0.16
   6  -6   7    1.69    0.14
   6  -6   7    2.09    0.12
  -6  -6  -7    1.83    0.19
  -6  -6   7    1.90    0.16
  -6   6  -7    1.70    0.21
   6   6   7    2.02    0.16
   0  -7  -7    3.62    0.21
   0  -7  -7    3.76    0.17
   0  -7   7    3.56    0.18
   0  -7   7    3.46    0.21
   1  -7   7    6.84    0.24
   1  -7   7    6.66    0.28
   1   7  -7    7.07    0.27
  -1  -7  -7    6.88    0.28
  -1  -7  -7    7.01    0.24
   1  -7  -7    6.82    0.22
   1   7   7    6.83    0.28
   1  -7  -7    6.78    0.29
  -2  -7  -7    4.03    0.24
   2  -7   7    3.75    0.26
   2  -7   7    3.29    0.19
   2   7  -7    3.44    0.21
   2  -7   7    3.56    0.22
  -2  -7  -7    3.65    0.27
   2  -7   7    3.24    0.26
  -2  -7  -7    3.39    0.25
   2  -7  -7    3.92    0.18
  -2  -7   7    4.15    0.21
  -2  -7   7    3.82    0.22
   2   7   7    3.89    0.22
   2  -7  -7    3.47    0.21
   3  -7   7    6.20    0.28
   3  -7   7    6.58    0.39
   3   7  -7    6.76    0.37
  -3  -7  -7    6.76    0.35
  -3  -7  -7    6.21    0.27
   3  -7   7    6.40    0.32
  -3  -7  -7    6.71    0.38
   3  -7   7    6.75    0.25
   3   7   7    6.71    0.26
   3  -7  -7    6.83    0.33
  -3  -7   7    6.46    0.31
   3  -7  -7    6.55    0.34
  -3  -7   7    6.69    0.30
   3  -7  -7    6.76    0.24
   4  -7   7   15.18    0.52
  -4  -7  -7   16.04    0.55
   4   7  -7   16.51    0.45
   4  -7   7   15.77    0.48
  -4  -7  -7   16.15    0.52
   4  -7   7   15.89    0.44
   4  -7   7   15.52    0.58
  -4  -7   7   15.14    0.50
   4  -7  -7   16.13    0.43
  -4  -7   7   15.88    0.50
  -4   7  -7   14.81    0.61
   5   7  -7    7.60    0.28
   5  -7   7    7.86    0.27
   5  -7   7    7.89    0.30
  -5  -7  -7    8.07    0.39
  -5  -7   7    8.01    0.34
  -5  -7   7    7.93    0.33
  -5   7  -7    7.93    0.44
   5   7   7    8.03    0.33
   5  -7  -7    7.52    0.26
   6  -7   7    0.05    0.08
  -6  -7  -7    0.05    0.15
   6  -7   7   -0.02    0.10
  -6  -7   7    0.04    0.12
  -6  -7   7    0.01    0.11
  -6   7  -7    0.17    0.16
   6   7   7    0.28    0.12
   0  -8  -7   13.93    0.38
   0   8  -7   14.29    0.42
   0  -8   7   14.04    0.44
   0  -8  -7   14.60    0.44
   0  -8   7   14.15    0.40
   1  -8   7   13.28    0.38
   1   8  -7   13.10    0.41
  -1  -8  -7   13.27    0.44
  -1  -8  -7   12.54    0.37
   1  -8   7   12.93    0.41
  -1  -8  -7   13.19    0.38
  -1  -8  -7   13.72    0.43
  -1  -8   7   12.83    0.41
   1  -8  -7   13.43    0.40
   1   8   7   12.81    0.42
   1  -8  -7   13.52    0.43
   1  -8  -7   12.79    0.36
  -1  -8   7   12.51    0.42
   2  -8   7    1.52    0.21
  -2  -8  -7    1.71    0.22
   2  -8   7    1.67    0.18
  -2  -8  -7    1.77    0.20
   2  -8   7    1.92    0.13
   2   8  -7    1.82    0.19
   2  -8   7    1.70    0.15
  -2  -8  -7    1.52    0.14
   2   8   7    1.63    0.18
   2  -8  -7    1.76    0.18
   2  -8  -7    1.66    0.13
   2  -8  -7    1.38    0.17
  -2  -8   7    1.63    0.16
   2  -8  -7    1.73    0.15
  -2  -8   7    1.92    0.17
  -3  -8  -7   34.33    0.88
  -3  -8  -7   33.71    0.82
  -3  -8  -7   33.39    0.91
   3  -8   7   33.88    0.93
   3  -8   7   33.83    0.90
   3  -8   7   33.63    0.81
   3  -8  -7   33.48    0.80
   3  -8  -7   33.16    0.98
   3  -8  -7   32.42    0.85
   3   8   7   33.50    0.81
  -3  -8   7   33.76    0.86
  -3  -8   7   33.77    0.86
   3  -8  -7   32.97    0.88
   4  -8   7    9.18    0.39
  -4  -8  -7    8.99    0.43
   4  -8   7    9.78    0.46
   4  -8   7    9.51    0.34
  -4  -8  -7    9.69    0.40
   4   8  -7    9.44    0.32
   4  -8   7    9.44    0.31
   4  -8  -7    9.27    0.30
  -4  -8   7    9.81    0.37
  -4  -8   7    9.39    0.36
  -4   8  -7    9.25    0.48
   5  -8   7   10.82    0.35
  -5  -8  -7   11.05    0.42
   5   8  -7   10.63    0.34
   5  -8   7   10.62    0.41
   5  -8   7   11.43    0.33
  -5  -8   7   11.35    0.38
  -5   8  -7   11.62    0.48
   5   8   7   11.53    0.38
  -5  -8   7   12.02    0.39
   5  -8  -7   10.90    0.33
  -6  -8  -7    7.22    0.29
   6  -8   7    7.25    0.25
   6  -8   7    7.28    0.22
  -6  -8   7    6.82    0.26
   6   8   7    7.56    0.26
  -6  -8   7    7.74    0.27
  -6   8  -7    7.07    0.32
   0  -9  -7    1.44    0.13
   0  -9   7    1.52    0.17
   0  -9  -7    1.06    0.15
   0  -9  -7    1.26    0.13
   0  -9   7    1.36    0.18
   0  -9   7    1.56    0.14
   0   9  -7    1.31    0.15
   0  -9  -7    1.38    0.17
   1  -9   7    2.27    0.19
  -1  -9  -7    2.24    0.15
  -1  -9  -7    1.87    0.18
   1  -9   7    2.14    0.16
   1  -9   7    1.91    0.20
  -1  -9  -7    2.33    0.16
  -1  -9  -7    2.36    0.20
   1   9  -7    2.10    0.18
  -1  -9   7    2.74    0.19
   1  -9  -7    2.35    0.15
   1  -9  -7    1.96    0.14
   1  -9  -7    1.97    0.18
   1  -9  -7    1.95    0.19
   1   9   7    2.56    0.20
  -1  -9   7    2.23    0.19
   2   9  -7   10.58    0.44
  -2  -9  -7   11.88    0.36
  -2  -9  -7   11.81    0.49
   2  -9   7   11.18    0.34
   2  -9   7   11.64    0.38
   2  -9   7   11.41    0.46
   2  -9   7   11.86    0.43
  -2  -9  -7   10.41    0.43
   2  -9  -7   11.65    0.34
   2  -9  -7   11.78    0.42
   2  -9  -7   11.99    0.39
  -2  -9   7   12.10    0.39
  -2  -9   7   11.16    0.40
   2  -9  -7   11.53    0.35
  -3  -9  -7    5.76    0.26
  -3  -9  -7    5.48    0.29
   3  -9   7    5.40    0.31
   3  -9   7    4.74    0.31
   3  -9   7    5.08    0.22
  -3  -9  -7    5.07    0.31
   3  -9  -7    5.03    0.32
   3  -9  -7    4.95    0.25
   3  -9  -7    5.24    0.30
   3  -9  -7    5.10    0.23
   3   9   7    4.87    0.24
  -3  -9   7    5.21    0.31
  -3  -9   7    5.29    0.29
   4  -9   7   27.90    0.68
   4  -9   7   27.14    0.80
  -4  -9  -7   27.92    0.75
   4  -9   7   27.35    0.70
   4  -9   7   26.83    0.76
  -4  -9  -7   28.66    0.78
   4  -9  -7   27.36    0.67
   4  -9  -7   26.91    0.71
  -4   9  -7   26.48    0.82
  -4  -9   7   27.93    0.73
  -4  -9   7   27.91    0.74
   5  -9   7    7.30    0.27
   5  -9   7    7.08    0.33
   5   9  -7    6.79    0.28
   5  -9   7    7.42    0.24
  -5  -9  -7    7.62    0.34
  -5  -9   7    7.53    0.30
   5   9   7    7.75    0.30
  -5  -9   7    7.62    0.31
  -5   9  -7    8.43    0.40
   5  -9  -7    7.25    0.26
   0 -10  -7    0.27    0.10
   0 -10   7    0.52    0.16
   0  10  -7    0.35    0.14
   0 -10  -7    0.32    0.12
   0 -10   7    0.24    0.13
   0 -10  -7    0.39    0.15
   0 -10  -7    0.38    0.15
  -1 -10  -7   32.49    0.84
  -1 -10  -7   33.20    0.79
  -1 -10  -7   31.65    0.78
   1  10  -7   31.02    0.84
  -1 -10  -7   31.60    0.84
   1 -10   7   31.56    0.86
   1 -10   7   31.00    0.81
   1 -10   7   31.63    0.84
   1 -10  -7   32.02    0.78
  -1 -10   7   32.55    0.82
   1  10   7   31.81    0.84
  -1 -10   7   31.10    0.83
   1 -10  -7   32.03    0.78
   1 -10  -7   32.80    0.86
   1 -10  -7   31.67    0.82
   2 -10   7    9.17    0.38
  -2 -10  -7    8.90    0.45
   2 -10   7    8.97    0.29
   2 -10   7    9.42    0.44
  -2 -10  -7    8.89    0.31
  -2 -10  -7    9.28    0.39
  -2 -10   7    8.93    0.36
  -2 -10   7    8.62    0.34
   2 -10  -7    9.13    0.30
   2 -10  -7    9.05    0.39
   2 -10  -7    9.07    0.30
   2 -10  -7    8.86    0.36
   3 -10   7   11.12    0.48
  -3 -10  -7   10.63    0.36
  -3 -10  -7   10.97    0.42
   3 -10   7   11.33    0.43
  -3 -10  -7   12.28    0.47
   3 -10   7   10.54    0.33
   3 -10  -7   11.20    0.43
  -3 -10   7   11.01    0.39
   3 -10  -7   11.08    0.35
   3 -10  -7   10.98    0.39
   3 -10  -7   11.38    0.35
  -3 -10   7   11.35    0.41
   3  10   7   11.09    0.34
   4 -10   7    8.73    0.33
  -4 -10  -7    9.11    0.40
   4 -10   7    9.45    0.29
  -4 -10  -7    9.55    0.37
   4 -10   7    9.12    0.38
  -4 -10   7    9.49    0.34
   4 -10  -7    8.99    0.34
  -4 -10   7    9.34    0.35
   4 -10  -7    8.70    0.30
  -4  10  -7    8.79    0.46
  -5 -10  -7    3.37    0.21
   5 -10   7    2.98    0.16
   5 -10   7    3.17    0.16
  -5 -10   7    3.68    0.20
  -5  10  -7    2.83    0.24
  -5 -10   7    3.62    0.19
   5  10   7    3.63    0.19
   0 -11   7    3.07    0.23
   0 -11  -7    3.15    0.23
   0 -11  -7    3.29    0.17
   0 -11  -7    2.95    0.22
   0 -11  -7    3.34    0.19
  -1 -11  -7    0.73    0.12
   1 -11   7    0.93    0.17
   1 -11   7    0.87    0.19
  -1 -11  -7    0.96    0.18
   1 -11  -7    0.87    0.18
   1  11   7    0.86    0.18
   1 -11  -7    0.69    0.13
   1 -11  -7    0.99    0.12
  -1 -11   7    0.52    0.16
   1 -11  -7    0.90    0.16
   2 -11   7    2.86    0.26
  -2 -11  -7    3.29    0.18
   2 -11   7    3.46    0.17
   2 -11   7    3.32    0.24
  -2 -11  -7    2.96    0.24
  -2 -11   7    3.32    0.21
   2 -11  -7    3.16    0.22
   2 -11  -7    3.41    0.19
   2 -11  -7    2.75    0.24
   2 -11  -7    2.96    0.17
  -2 -11   7    3.72    0.24
   3 -11   7    4.25    0.30
   3 -11   7    5.16    0.21
   3 -11   7    5.18    0.30
  -3 -11  -7    5.03    0.28
  -3 -11  -7    5.73    0.31
   3 -11  -7    4.37    0.23
   3 -11  -7    4.38    0.28
   3 -11  -7    4.47    0.23
   3 -11  -7    5.22    0.29
  -3 -11   7    4.70    0.26
  -3 -11   7    4.88    0.28
  -4 -11  -7    0.22    0.17
   4 -11   7    0.23    0.14
  -4 -11  -7    0.18    0.15
   4 -11   7    0.23    0.09
   4 -11  -7    0.10    0.14
  -4 -11   7    0.21    0.12
   4 -11  -7    0.27    0.13
  -4  11  -7    0.29    0.20
  -4 -11   7    0.37    0.15
   5 -11   7    1.82    0.10
  -5 -11  -7    1.89    0.17
  -5 -11   7    1.90    0.14
  -5 -11   7    1.81    0.15
   5  11   7    1.65    0.14
  -5  11  -7    1.78    0.20
   0 -12  -7    1.71    0.14
   0  12   7    1.84    0.20
   0 -12  -7    1.82    0.16
   0 -12  -7    1.56    0.19
   0 -12  -7    1.58    0.18
   0 -12   7    1.48    0.20
   1 -12   7   16.10    0.53
  -1 -12  -7   16.48    0.46
   1 -12   7   16.12    0.57
  -1 -12  -7   16.95    0.52
  -1 -12   7   16.15    0.53
   1  12   7   16.84    0.54
   1 -12  -7   16.60    0.53
   1 -12  -7   17.48    0.46
   1 -12  -7   16.57    0.47
   1 -12  -7   16.86    0.51
   2 -12   7   12.79    0.37
   2 -12   7   13.29    0.50
  -2 -12  -7   12.99    0.45
   2 -12   7   12.85    0.45
  -2 -12  -7   12.83    0.38
   2 -12  -7   12.36    0.46
  -2 -12   7   13.08    0.43
   2 -12  -7   13.28    0.38
   2 -12  -7   13.48    0.40
  -2 -12   7   13.41    0.45
   2 -12  -7   13.19    0.43
   3 -12   7    5.76    0.21
   3 -12   7    4.98    0.29
  -3 -12  -7    5.38    0.30
   3 -12   7    4.60    0.29
  -3 -12  -7    4.94    0.29
   3 -12  -7    4.88    0.22
   3 -12  -7    4.83    0.24
  -3 -12   7    4.81    0.27
   3 -12  -7    4.67    0.30
   3 -12  -7    4.92    0.27
  -3 -12   7    5.17    0.29
   4 -12   7    0.85    0.09
  -4 -12  -7    0.77    0.15
  -4 -12  -7    0.70    0.17
  -4  12  -7    0.76    0.21
   4 -12  -7    0.73    0.14
  -4 -12   7    1.02    0.14
  -4 -12   7    0.82    0.15
   0 -13  -7    0.18    0.15
   0  13   7    0.11    0.16
   0 -13  -7    0.12    0.16
   0 -13   7    0.15    0.17
   0 -13  -7    0.15    0.11
  -1 -13  -7    5.94    0.31
   1 -13   7    5.30    0.31
  -1 -13  -7    5.75    0.24
   1 -13   7    4.71    0.31
   1 -13  -7    5.42    0.30
   1 -13  -7    5.39    0.24
   1 -13  -7    5.21    0.25
   1  13   7    5.49    0.32
   1 -13  -7    5.33    0.28
  -1 -13   7    5.12    0.32
  -2 -13  -7   10.80    0.33
   2 -13   7   11.53    0.32
   2 -13   7   11.10    0.41
  -2 -13  -7   11.64    0.40
  -2 -13   7   10.86    0.40
   2 -13  -7   11.00    0.33
   2 -13  -7   11.33    0.37
   2 -13  -7   10.93    0.35
   2 -13  -7   10.62    0.41
   3 -13   7    2.94    0.21
  -3 -13  -7    2.67    0.20
   3 -13   7    2.84    0.16
  -3  13   7    2.81    0.21
   3 -13  -7    2.88    0.15
  -3 -13   7    3.05    0.18
   3 -13  -7    2.69    0.22
   3 -13  -7    2.92    0.18
  -3 -13   7    2.91    0.20
  -4 -13  -7    0.51    0.13
  -4 -13  -7    0.45    0.17
   4 -13   7    0.62    0.08
   4 -13  -7    0.43    0.12
  -4 -13   7    0.59    0.18
   4  13   7    0.65    0.12
  -4 -13   7    0.61    0.11
   0  14   7    0.30    0.16
   0 -14  -7    0.28    0.10
   0 -14  -7    0.46    0.15
  -1 -14  -7    4.59    0.21
  -1 -14  -7    4.16    0.24
  -1  14   7    4.41    0.27
   1 -14  -7    4.47    0.28
   1 -14  -7    4.45    0.20
   1 -14  -7    4.43    0.26
   2 -14   7    0.55    0.09
   2 -14   7    0.62    0.16
  -2 -14  -7    0.33    0.14
  -2  14   7    0.79    0.16
  -2 -14  -7    0.60    0.11
   2 -14  -7    0.39    0.15
   2 -14  -7    0.45    0.13
   2 -14  -7    0.57    0.18
   2 -14  -7    0.62    0.10
  -3 -14  -7    1.47    0.15
   3 -14   7    1.50    0.10
   3 -14  -7    1.48    0.14
   3 -14  -7    1.43    0.11
   0 -15  -7    1.21    0.15
   0 -15  -7    1.11    0.11
  -1 -15  -7    4.40    0.24
  -1 -15  -7    4.37    0.19
   1 -15  -7    4.61    0.19
   1 -15  -7    4.30    0.24
  -2 -15  -7    4.08    0.23
   2 -15  -7    4.15    0.17
   2 -15  -7    3.88    0.21
   0 -16  -7   -0.01    0.08
   0 -16  -7   -0.01    0.11
  -1 -16  -7    1.45    0.14
   1 -16  -7    1.44    0.13
   1 -16  -7    1.53    0.10
   0   0  -8   46.19    1.06
   1   0  -8   12.37    0.34
   1   0   8   11.58    0.37
  -1   0  -8   11.88    0.32
   2   0  -8    0.36    0.08
   2   0   8    0.30    0.09
   2   0  -8    0.24    0.11
   3   0  -8    4.94    0.20
   3   0  -8    5.51    0.28
   3   0   8    5.18    0.25
   4   0   8    0.02    0.13
   4   0   8   -0.01    0.10
  -4   0  -8   -0.07    0.23
   4   0  -8    0.06    0.10
   4   0  -8   -0.06    0.18
   5   0   8   -0.02    0.10
   5   0  -8    0.14    0.11
  -5   0   8    0.12    0.17
   5   0   8    0.02    0.13
  -5   0  -8   -0.18    0.23
  -6   0  -8    3.45    0.27
   6   0  -8    3.70    0.19
   6   0   8    3.59    0.21
   0   1  -8   46.08    1.04
   0  -1  -8   44.26    1.04
   1  -1   8   49.42    1.16
   1   1  -8   50.11    1.15
  -1   1  -8   49.13    1.13
   1  -1  -8   50.48    1.15
   1   1   8   47.89    1.15
   2  -1   8    9.06    0.30
   2   1  -8    9.44    0.31
   2   1  -8    8.76    0.26
   2   1   8    9.68    0.31
   2  -1  -8    9.31    0.31
   2  -1  -8    9.25    0.26
   3  -1   8    1.10    0.14
   3   1  -8    0.82    0.10
   3   1  -8    0.87    0.15
   3  -1  -8    0.92    0.15
   3   1   8    1.24    0.14
   3  -1  -8    0.91    0.10
   4  -1   8    5.37    0.28
   4  -1   8    5.26    0.23
  -4  -1  -8    5.08    0.38
   4   1  -8    5.56    0.23
  -4  -1  -8    5.57    0.32
   4   1  -8    5.47    0.31
   4  -1   8    5.25    0.30
   4   1   8    5.09    0.27
  -4  -1   8    5.23    0.31
  -4   1  -8    5.50    0.27
   4  -1  -8    5.68    0.31
  -4   1  -8    5.69    0.36
   4   1   8    5.24    0.23
   4  -1  -8    5.72    0.22
  -5  -1  -8    3.38    0.30
   5  -1   8    3.68    0.22
   5  -1   8    3.81    0.21
   5   1  -8    3.18    0.18
   5   1   8    3.87    0.23
   5   1   8    3.63    0.18
   5  -1  -8    4.11    0.21
  -5  -1   8    3.85    0.24
  -5   1  -8    3.25    0.31
  -6  -1  -8    4.58    0.28
   6   1  -8    5.11    0.22
   6  -1   8    5.08    0.25
  -6   1  -8    4.53    0.29
   6  -1  -8    4.94    0.21
   6   1   8    5.22    0.25
  -6  -1   8    4.83    0.28
   0  -2  -8    9.25    0.28
   0   2  -8   10.03    0.28
   1   2  -8   22.28    0.55
   1  -2   8   22.08    0.53
   1  -2   8   21.97    0.56
   1  -2  -8   21.89    0.55
  -1   2  -8   21.94    0.53
   1   2   8   20.63    0.56
   2   2  -8   19.13    0.48
   2   2  -8   19.68    0.53
   2  -2   8   19.59    0.49
   2  -2   8   19.17    0.53
   2   2   8   20.07    0.53
   2  -2  -8   20.38    0.53
   2  -2  -8   19.70    0.48
  -3  -2  -8   23.14    0.67
   3  -2   8   23.42    0.64
   3   2  -8   23.95    0.59
   3   2  -8   25.31    0.66
   3   2   8   23.48    0.63
   3  -2  -8   23.84    0.65
   3  -2  -8   24.74    0.58
   4  -2   8    1.49    0.17
   4   2  -8    1.78    0.23
   4  -2   8    1.82    0.14
   4   2  -8    1.59    0.14
  -4  -2  -8    1.29    0.23
   4  -2   8    1.78    0.19
   4  -2  -8    1.63    0.21
  -4  -2   8    1.53    0.19
  -4   2  -8    1.29    0.26
   4   2   8    1.85    0.14
  -4   2  -8    1.78    0.19
   4   2   8    1.74    0.18
   4  -2  -8    1.16    0.12
   5  -2   8    5.12    0.23
  -5  -2  -8    5.06    0.32
   5  -2   8    5.05    0.28
   5   2  -8    5.73    0.25
   5   2   8    5.08    0.24
   5  -2  -8    5.41    0.23
   5   2   8    5.38    0.29
  -5   2  -8    5.52    0.36
  -5  -2   8    5.22    0.30
   6   2  -8    2.29    0.15
   6  -2   8    2.32    0.17
  -6   2  -8    2.20    0.24
   6   2   8    2.46    0.18
  -6  -2   8    2.15    0.18
   6  -2  -8    2.43    0.14
   0   3  -8   65.62    1.50
   0   3   8   66.24    1.52
   1  -3   8   26.93    0.65
  -1   3   8   25.35    0.65
   1   3  -8   26.10    0.64
   1  -3   8   25.38    0.62
   1  -3  -8   25.77    0.63
   1  -3  -8   25.59    0.60
   1   3   8   24.79    0.65
   2  -3   8   13.73    0.36
   2   3  -8   14.04    0.41
   2  -3   8   13.34    0.40
   2   3   8   13.46    0.40
   2  -3  -8   13.11    0.40
   2  -3  -8   12.84    0.34
  -3  -3  -8    7.98    0.47
   3   3  -8    6.87    0.32
   3   3  -8    7.03    0.24
   3  -3   8    6.97    0.30
   3  -3   8    6.63    0.25
  -3  -3  -8    6.05    0.35
  -3   3  -8    7.29    0.33
   3   3   8    6.96    0.30
   3  -3  -8    6.95    0.23
   3  -3  -8    6.89    0.31
  -3  -3   8    6.53    0.29
  -4  -3  -8    3.46    0.25
   4  -3   8    2.58    0.16
   4  -3   8    3.01    0.27
   4   3  -8    3.17    0.26
   4  -3   8    3.09    0.20
   4  -3   8    3.03    0.22
  -4  -3  -8    2.21    0.24
   4   3  -8    2.94    0.17
   4   3   8    3.01    0.22
  -4   3  -8    2.63    0.22
   4  -3  -8    2.77    0.16
   4   3   8    2.89    0.16
   4  -3  -8    2.69    0.25
  -4   3  -8    3.08    0.30
  -4  -3   8    2.66    0.21
  -4  -3   8    2.68    0.20
   5  -3   8    7.46    0.32
   5  -3   8    7.67    0.28
   5   3  -8    7.76    0.29
  -5  -3  -8    7.80    0.42
   5  -3  -8    8.31    0.28
  -5  -3   8    7.75    0.35
  -5   3  -8    8.02    0.47
   5   3   8    8.33    0.34
   6  -3   8    2.41    0.14
   6   3  -8    2.37    0.14
   6  -3   8    2.36    0.16
  -6  -3   8    2.20    0.18
   6   3   8    2.37    0.18
   6  -3  -8    2.41    0.14
  -6   3  -8    2.07    0.23
   0   4  -8    3.81    0.17
   0  -4  -8    3.31    0.15
   0  -4   8    3.68    0.20
   0   4   8    3.81    0.20
  -1  -4  -8   26.75    0.66
   1  -4   8   28.59    0.67
   1  -4   8   27.66    0.70
  -1   4   8   27.22    0.70
   1  -4  -8   27.49    0.68
   1   4   8   27.84    0.70
   1  -4  -8   28.40    0.71
   1  -4  -8   27.85    0.65
   2  -4   8   14.86    0.39
  -2   4   8   13.97    0.42
   2  -4   8   13.91    0.43
   2   4  -8   14.47    0.43
   2   4   8   14.39    0.43
   2  -4  -8   14.93    0.37
   2  -4  -8   14.75    0.43
   2  -4  -8   14.57    0.44
   3  -4   8    5.17    0.21
   3   4  -8    5.26    0.22
   3   4  -8    4.92    0.27
   3  -4   8    5.22    0.31
   3  -4   8    5.21    0.27
  -3  -4  -8    5.78    0.29
  -3  -4  -8    5.38    0.28
   3  -4  -8    5.01    0.20
   3   4   8    5.00    0.22
  -3   4  -8    5.18    0.25
  -3  -4   8    4.95    0.26
   3  -4  -8    5.42    0.30
  -3  -4   8    4.95    0.28
  -4  -4  -8    5.64    0.32
  -4  -4  -8    6.23    0.34
   4  -4   8    6.00    0.24
   4  -4   8    6.18    0.35
   4   4  -8    6.48    0.26
   4  -4   8    6.21    0.32
   4  -4   8    5.90    0.29
  -4  -4   8    6.31    0.30
  -4   4  -8    6.63    0.39
  -4  -4   8    6.46    0.32
   4  -4  -8    6.32    0.24
   4   4   8    5.85    0.25
   4   4   8    6.34    0.32
  -4   4  -8    6.77    0.29
   5   4  -8    8.17    0.29
   5  -4   8    7.97    0.28
   5  -4   8    8.14    0.32
  -5  -4  -8    8.23    0.42
  -5  -4   8    8.12    0.36
  -5  -4   8    8.05    0.36
   5  -4  -8    8.37    0.28
   5   4   8    7.68    0.34
  -5   4  -8    8.61    0.47
   6   4  -8    0.47    0.11
   6  -4   8    0.51    0.12
   6  -4   8    0.57    0.10
  -6   4  -8    0.43    0.18
   6   4   8    0.52    0.13
   6  -4  -8    0.51    0.11
  -6  -4   8    0.53    0.13
   0  -5  -8   13.51    0.35
   0   5   8   13.79    0.40
   0  -5   8   12.92    0.40
   0  -5   8   13.22    0.36
   0  -5  -8   13.53    0.40
   0   5  -8   14.03    0.38
  -1   5   8   35.37    0.88
  -1  -5  -8   35.02    0.83
   1  -5   8   35.55    0.84
   1   5  -8   35.79    0.86
   1  -5   8   36.07    0.88
   1   5   8   35.90    0.88
   1  -5  -8   35.38    0.82
   1  -5  -8   36.20    0.88
   2  -5   8   16.73    0.45
   2   5  -8   17.15    0.49
   2   5   8   17.48    0.49
   2  -5  -8   17.74    0.50
   2  -5  -8   16.37    0.43
   2  -5  -8   16.18    0.48
  -3  -5  -8   10.61    0.43
  -3  -5  -8   11.29    0.41
   3  -5   8   10.17    0.44
   3  -5   8   11.33    0.32
   3  -5   8   10.31    0.34
   3   5  -8    9.95    0.33
   3   5  -8   10.75    0.41
   3  -5   8   10.54    0.39
   3  -5  -8   10.93    0.31
  -3  -5   8   10.98    0.37
  -3   5  -8   10.71    0.39
   3   5   8   10.72    0.33
   3  -5  -8   10.16    0.40
  -3  -5   8   10.65    0.38
   4  -5   8   18.30    0.54
  -4  -5  -8   18.72    0.59
  -4  -5  -8   19.90    0.62
   4  -5   8   19.00    0.58
   4   5  -8   19.34    0.51
   4  -5   8   19.52    0.65
   4  -5   8   18.56    0.50
  -4  -5   8   19.09    0.56
   4   5   8   18.51    0.50
  -4   5  -8   17.79    0.56
  -4   5  -8   19.96    0.69
  -4  -5   8   19.38    0.56
   4  -5  -8   18.71    0.49
   5  -5   8   14.44    0.40
   5   5  -8   14.01    0.41
  -5  -5  -8   14.41    0.51
   5  -5   8   14.35    0.43
   5  -5  -8   13.93    0.40
   5   5   8   14.21    0.46
  -5  -5   8   13.73    0.46
  -5  -5   8   14.53    0.47
  -5   5  -8   14.81    0.58
  -6  -5  -8    1.63    0.20
   6  -5   8    1.73    0.12
   6  -5   8    1.46    0.14
  -6   5  -8    1.44    0.21
  -6  -5   8    1.49    0.15
   6   5   8    1.70    0.15
   0  -6   8    0.23    0.08
   0  -6   8    0.30    0.11
   0  -6  -8    0.13    0.08
   0   6   8    0.25    0.10
   0   6  -8    0.14    0.09
   0  -6  -8    0.06    0.10
  -1  -6  -8   37.27    0.90
   1  -6   8   38.67    0.95
   1   6  -8   38.87    0.94
   1  -6   8   39.41    0.92
   1   6   8   38.17    0.95
   1  -6  -8   39.18    0.89
   1  -6  -8   38.77    0.96
   2  -6   8   10.32    0.37
  -2  -6  -8   10.49    0.41
  -2  -6  -8   10.38    0.35
   2  -6   8   10.78    0.44
   2  -6   8   10.54    0.33
  -2  -6  -8   10.97    0.42
   2   6  -8   10.70    0.37
   2  -6  -8   10.00    0.37
   2  -6  -8   10.67    0.37
   2  -6  -8   10.71    0.30
  -2  -6   8   10.14    0.37
   2   6   8   10.75    0.37
  -2  -6   8   10.41    0.35
   3  -6   8   31.35    0.82
  -3  -6  -8   29.67    0.76
  -3  -6  -8   31.30    0.85
   3  -6   8   31.87    0.87
  -3  -6  -8   31.20    0.83
   3  -6   8   30.48    0.78
   3   6  -8   30.43    0.84
   3  -6   8   31.43    0.75
  -3  -6   8   31.50    0.81
   3  -6  -8   33.32    0.75
   3   6   8   30.11    0.75
   3  -6  -8   30.71    0.82
  -3  -6   8   31.14    0.80
  -3   6  -8   30.33    0.79
   4  -6   8    5.74    0.29
  -4  -6  -8    5.39    0.32
  -4  -6  -8    5.38    0.30
   4  -6   8    5.11    0.33
   4   6  -8    5.68    0.26
   4  -6   8    5.54    0.32
   4  -6   8    5.85    0.23
  -4   6  -8    4.90    0.27
   4  -6  -8    5.94    0.23
  -4  -6   8    5.55    0.31
   4   6   8    5.08    0.25
  -4  -6   8    5.63    0.29
  -4   6  -8    5.02    0.37
   5  -6   8    3.80    0.20
   5  -6   8    4.00    0.21
   5   6  -8    3.56    0.18
  -5  -6  -8    3.96    0.26
   5   6   8    3.50    0.23
  -5   6  -8    3.82    0.31
  -5  -6   8    4.03    0.23
   5  -6  -8    3.88    0.20
  -5  -6   8    4.11    0.23
   6  -6   8    2.47    0.13
   6  -6   8    2.13    0.14
  -6  -6  -8    2.37    0.20
  -6  -6   8    2.48    0.16
   6   6   8    2.45    0.16
  -6   6  -8    2.29    0.21
   0  -7  -8    5.07    0.25
   0   7   8    5.45    0.25
   0  -7   8    5.07    0.25
   0  -7  -8    5.11    0.20
   0  -7   8    4.97    0.22
   0   7  -8    5.30    0.24
  -1  -7  -8   27.72    0.69
   1  -7   8   29.01    0.75
   1   7  -8   28.66    0.73
   1  -7   8   28.08    0.71
  -1  -7   8   27.32    0.72
   1  -7  -8   28.52    0.75
   1  -7  -8   29.10    0.68
   1   7   8   28.68    0.75
  -2  -7  -8   33.18    0.85
  -2  -7  -8   33.62    0.88
   2  -7   8   33.15    0.79
  -2  -7  -8   34.12    0.80
   2  -7   8   33.90    0.86
   2  -7   8   32.84    0.89
   2  -7   8   33.48    0.82
   2   7  -8   32.77    0.85
   2  -7  -8   30.75    0.80
   2  -7  -8   33.65    0.79
   2   7   8   33.54    0.85
  -2  -7   8   32.33    0.83
  -2  -7   8   31.84    0.84
   2  -7  -8   33.29    0.86
  -3  -7  -8   13.56    0.47
  -3  -7  -8   13.47    0.50
   3  -7   8   12.21    0.43
   3   7  -8   12.51    0.50
   3  -7   8   12.02    0.41
   3  -7   8   12.77    0.50
  -3  -7  -8   13.15    0.39
   3  -7   8   12.66    0.37
   3  -7  -8   12.87    0.46
  -3  -7   8   12.71    0.43
   3   7   8   12.95    0.37
  -3   7  -8   12.44    0.44
   3  -7  -8   13.19    0.36
  -3  -7   8   12.55    0.42
   3  -7  -8   12.07    0.47
   4  -7   8    4.73    0.22
  -4  -7  -8    5.06    0.29
   4  -7   8    4.70    0.31
   4  -7   8    4.74    0.31
  -4  -7  -8    5.08    0.31
   4   7  -8    4.87    0.25
   4  -7   8    5.02    0.28
  -4  -7   8    4.82    0.30
  -4  -7   8    5.00    0.28
   4   7   8    4.55    0.23
   4  -7  -8    5.01    0.22
  -4   7  -8    4.97    0.36
   5   7  -8    3.18    0.17
   5  -7   8    3.16    0.19
  -5  -7  -8    3.55    0.25
   5  -7   8    3.14    0.16
   5  -7   8    3.33    0.24
  -5   7  -8    3.29    0.28
  -5  -7   8    3.19    0.20
   5   7   8    3.39    0.21
   5  -7  -8    3.12    0.16
  -5  -7   8    3.38    0.21
  -6  -7  -8    0.34    0.15
   6  -7   8    0.15    0.08
   6  -7   8    0.21    0.10
  -6   7  -8    0.29    0.15
   6   7   8    0.17    0.11
  -6  -7   8    0.15    0.11
   0  -8  -8    0.39    0.16
   0  -8  -8    0.41    0.10
   0  -8   8    0.49    0.11
   0  -8  -8    0.61    0.11
   0   8   8    0.52    0.13
   0   8  -8    0.44    0.13
   0  -8   8    0.47    0.15
   0  -8   8    0.58    0.14
   0  -8  -8    0.49    0.14
  -1  -8  -8   61.45    1.42
   1  -8   8   63.61    1.48
  -1  -8  -8   62.43    1.47
   1  -8   8   63.00    1.49
  -1  -8  -8   61.48    1.42
   1   8  -8   60.61    1.46
   1  -8   8   60.65    1.44
   1   8   8   62.36    1.48
   1  -8  -8   60.66    1.42
   1  -8  -8   60.08    1.45
  -1  -8   8   62.15    1.47
   1  -8  -8   62.92    1.41
  -1  -8   8   61.32    1.45
   1  -8  -8   62.99    1.48
   2  -8   8   38.01    0.96
  -2  -8  -8   38.53    0.93
  -2  -8  -8   39.71    0.99
   2  -8   8   39.63    1.00
   2   8  -8   38.91    1.00
   2  -8   8   38.93    0.93
  -2  -8  -8   39.90    1.02
   2  -8   8   39.77    1.03
  -2  -8   8   38.79    0.97
   2  -8  -8   37.30    0.93
   2  -8  -8   41.15    0.93
   2   8   8   40.78    0.99
   2  -8  -8   39.54    1.00
  -2  -8   8   38.79    0.97
   2  -8  -8   37.64    0.96
   3  -8   8    0.29    0.14
  -3  -8  -8    0.29    0.12
  -3  -8  -8    0.42    0.20
   3  -8   8    0.22    0.10
  -3  -8  -8    0.15    0.17
   3  -8   8    0.26    0.19
   3  -8  -8    0.30    0.11
   3  -8  -8    0.38    0.18
  -3  -8   8    0.28    0.14
   3   8   8    0.20    0.11
  -3  -8   8    0.22    0.13
   4  -8   8   21.84    0.61
   4  -8   8   22.74    0.67
  -4  -8  -8   24.21    0.67
   4  -8   8   23.22    0.59
  -4  -8  -8   23.16    0.70
   4  -8   8   23.61    0.72
  -4   8  -8   24.26    0.76
  -4  -8   8   23.96    0.65
  -4  -8   8   23.36    0.64
   4  -8  -8   22.70    0.58
  -5  -8  -8    1.60    0.20
   5  -8   8    2.09    0.13
   5  -8   8    1.95    0.21
   5  -8   8    1.68    0.15
  -5  -8   8    1.99    0.17
   5   8   8    1.69    0.17
  -5  -8   8    1.62    0.16
  -5   8  -8    1.67    0.23
   5  -8  -8    1.78    0.14
  -6  -8   8    1.66    0.13
   6   8   8    1.43    0.12
  -6   8  -8    1.31    0.17
   0  -9   8    1.92    0.20
   0   9   8    1.85    0.19
   0  -9  -8    1.74    0.18
   0  -9  -8    1.64    0.19
   0  -9  -8    1.75    0.14
   0   9  -8    1.34    0.17
   0  -9  -8    1.70    0.14
   1   9  -8   21.11    0.61
   1  -9   8   21.45    0.61
  -1  -9  -8   20.67    0.60
  -1  -9  -8   20.85    0.55
   1  -9   8   20.49    0.58
   1  -9   8   20.98    0.63
  -1  -9  -8   22.20    0.55
  -1  -9   8   19.87    0.57
   1  -9  -8   21.38    0.62
   1  -9  -8   22.49    0.55
  -1  -9   8   21.54    0.61
   1   9   8   21.30    0.61
   1  -9  -8   20.67    0.58
   1  -9  -8   19.75    0.54
  -2  -9  -8   16.75    0.46
   2  -9   8   16.28    0.45
   2  -9   8   16.48    0.57
  -2  -9  -8   17.47    0.53
  -2  -9  -8   16.42    0.57
   2  -9   8   16.40    0.53
   2  -9  -8   16.71    0.54
  -2  -9   8   15.86    0.49
   2  -9  -8   16.52    0.45
  -2  -9   8   16.35    0.51
   2   9   8   16.67    0.52
   2  -9  -8   16.72    0.45
   2  -9  -8   16.18    0.50
   3  -9   8    9.54    0.45
  -3  -9  -8    9.65    0.33
   3  -9   8   10.14    0.31
  -3  -9  -8    9.67    0.46
   3  -9   8    9.32    0.39
  -3  -9  -8    9.86    0.41
  -3  -9   8    9.59    0.37
   3  -9  -8    9.52    0.39
   3  -9  -8   10.20    0.32
   3  -9  -8   10.19    0.42
   3   9   8    9.88    0.32
  -3  -9   8   10.16    0.38
  -4  -9  -8   10.68    0.43
   4  -9   8   10.15    0.45
   4  -9   8   10.63    0.32
   4  -9   8    9.30    0.40
  -4  -9  -8   10.59    0.41
  -4  -9   8   10.51    0.38
  -4   9  -8   10.71    0.49
  -4  -9   8   10.70    0.38
   4  -9  -8   10.28    0.32
   5  -9   8    2.52    0.16
  -5  -9  -8    2.19    0.20
   5  -9   8    2.40    0.13
  -5  -9   8    2.63    0.17
  -5  -9   8    2.54    0.17
   5   9   8    2.36    0.17
  -5   9  -8    2.12    0.22
   0 -10   8    0.70    0.16
   0  10   8    0.93    0.17
   0 -10  -8    1.12    0.14
   0 -10  -8    0.75    0.16
   0 -10  -8    0.66    0.12
   0 -10  -8    1.15    0.18
  -1 -10  -8    1.58    0.15
  -1 -10  -8    1.54    0.14
   1 -10   8    1.60    0.18
  -1 -10  -8    1.44    0.19
   1 -10   8    1.11    0.19
   1 -10  -8    1.46    0.18
   1 -10  -8    1.25    0.13
   1  10   8    1.13    0.18
   1 -10  -8    1.26    0.19
   1 -10  -8    1.36    0.14
  -1 -10   8    1.48    0.18
  -1 -10   8    1.41    0.16
   2 -10   8   32.29    0.91
   2 -10   8   32.94    0.79
  -2 -10  -8   32.40    0.90
  -2 -10  -8   32.85    0.80
   2 -10   8   33.20    0.88
  -2 -10  -8   33.26    0.87
   2 -10  -8   33.12    0.84
   2 -10  -8   33.01    0.80
  -2 -10   8   32.40    0.85
   2 -10  -8   32.75    0.88
   2 -10  -8   31.99    0.80
  -2 -10   8   33.36    0.84
  -3 -10  -8   22.42    0.63
  -3 -10  -8   20.67    0.56
   3 -10   8   20.75    0.68
   3 -10   8   21.95    0.55
  -3 -10  -8   22.38    0.67
   3 -10   8   21.70    0.64
   3 -10  -8   21.87    0.56
  -3 -10   8   21.66    0.60
   3 -10  -8   22.03    0.64
   3  10   8   21.85    0.55
   3 -10  -8   21.08    0.60
   3 -10  -8   21.40    0.56
  -3 -10   8   21.48    0.62
  -4 -10  -8   -0.13    0.17
   4 -10   8    0.02    0.08
  -4 -10  -8    0.15    0.16
   4 -10   8   -0.08    0.14
  -4 -10   8    0.09    0.14
  -4  10  -8    0.08    0.20
  -4 -10   8    0.18    0.12
   4 -10  -8    0.11    0.11
   5 -10   8    3.98    0.16
  -5 -10  -8    4.06    0.22
  -5  10  -8    3.83    0.24
  -5 -10   8    4.13    0.22
  -5 -10   8    4.11    0.21
   5  10   8    3.97    0.21
   0 -11  -8    5.49    0.31
   0  11   8    5.88    0.32
   0 -11  -8    5.78    0.26
   0 -11  -8    5.72    0.32
   0 -11  -8    5.97    0.25
   0 -11   8    5.44    0.33
   1 -11   8    3.08    0.23
   1 -11   8    2.95    0.24
  -1 -11  -8    2.79    0.17
  -1 -11  -8    3.19    0.23
   1 -11  -8    2.90    0.22
   1  11   8    3.15    0.24
  -1 -11   8    3.05    0.22
   1 -11  -8    3.26    0.18
   1 -11  -8    2.66    0.23
   1 -11  -8    3.45    0.19
   2 -11   8   22.57    0.64
  -2 -11  -8   22.47    0.64
   2 -11   8   22.42    0.68
   2 -11   8   22.23    0.56
  -2 -11  -8   20.96    0.57
   2 -11  -8   21.54    0.65
   2 -11  -8   21.51    0.57
  -2 -11   8   21.99    0.60
   2 -11  -8   22.46    0.57
   2 -11  -8   21.37    0.61
  -2 -11   8   21.77    0.63
  -3 -11  -8    0.97    0.21
  -3 -11  -8    1.00    0.18
   3 -11   8    0.74    0.20
  -3 -11  -8    0.94    0.13
   3 -11   8    0.91    0.11
   3 -11   8    0.92    0.17
  -3 -11   8    0.87    0.15
  -3 -11   8    0.86    0.16
   3  11   8    0.82    0.12
   3 -11  -8    1.06    0.16
   3 -11  -8    1.06    0.13
   3 -11  -8    0.66    0.19
   3 -11  -8    0.87    0.13
  -4 -11  -8    4.74    0.26
   4 -11   8    4.29    0.27
   4 -11   8    5.10    0.19
  -4 -11  -8    4.89    0.28
  -4  11  -8    5.26    0.30
   4 -11  -8    4.55    0.23
  -4 -11   8    4.96    0.26
  -4 -11   8    5.20    0.25
   5 -11   8    1.94    0.10
  -5 -11  -8    2.13    0.16
  -5 -11   8    2.11    0.15
  -5 -11   8    2.26    0.14
   5  11   8    2.18    0.14
   0 -12  -8   11.05    0.36
   0 -12  -8   10.63    0.40
   0 -12  -8   10.61    0.41
   0 -12   8   10.10    0.43
   0 -12  -8   11.01    0.34
   0  12   8   11.59    0.42
  -1 -12  -8    1.67    0.14
  -1  12   8    1.85    0.20
  -1 -12  -8    1.91    0.20
   1 -12   8    1.76    0.22
   1 -12   8    1.68    0.20
   1 -12  -8    1.77    0.16
   1 -12  -8    1.43    0.20
   1 -12  -8    1.75    0.19
   1  12   8    1.90    0.21
   1 -12  -8    1.59    0.14
  -1 -12   8    1.93    0.19
   2 -12   8   22.03    0.54
  -2 -12  -8   20.72    0.55
  -2 -12  -8   22.57    0.62
   2 -12   8   21.20    0.66
   2 -12   8   21.89    0.63
   2 -12  -8   21.05    0.63
  -2 -12   8   22.29    0.62
  -2 -12   8   20.36    0.59
   2 -12  -8   21.76    0.60
   2 -12  -8   21.75    0.55
   2 -12  -8   22.08    0.56
   3 -12   8    0.65    0.19
  -3  12   8    0.27    0.16
   3 -12   8    0.52    0.15
   3 -12   8    0.53    0.10
  -3 -12  -8    0.36    0.20
  -3 -12  -8    0.38    0.16
   3 -12  -8    0.55    0.11
   3 -12  -8    0.59    0.14
   3 -12  -8    0.51    0.13
   3 -12  -8    0.49    0.17
  -3 -12   8    0.59    0.15
  -3 -12   8    0.42    0.13
   4 -12   8    6.20    0.20
  -4 -12  -8    5.76    0.30
  -4 -12  -8    6.14    0.27
  -4  12  -8    5.85    0.35
  -4 -12   8    6.19    0.27
  -4 -12   8    6.33    0.25
   4  12   8    6.20    0.26
   4 -12  -8    5.59    0.26
   0 -13  -8    2.23    0.20
   0 -13   8    1.98    0.21
   0 -13  -8    2.07    0.15
   0  13   8    2.37    0.22
  -1 -13  -8    1.29    0.18
   1 -13   8    1.40    0.19
  -1 -13  -8    1.20    0.13
  -1  13   8    1.10    0.18
   1 -13   8    1.65    0.21
   1 -13  -8    1.54    0.13
   1 -13  -8    1.26    0.15
   1  13   8    1.48    0.20
   1 -13  -8    1.37    0.19
  -1 -13   8    1.49    0.19
   1 -13  -8    1.32    0.17
  -2  13   8    0.88    0.17
   2 -13   8    0.74    0.19
  -2 -13  -8    0.69    0.16
   2 -13   8    0.71    0.16
  -2 -13  -8    0.82    0.11
   2 -13   8    0.83    0.10
   2 -13  -8    0.77    0.11
   2 -13  -8    0.80    0.15
   2 -13  -8    0.61    0.14
  -2 -13   8    0.81    0.16
   2 -13  -8    0.72    0.17
   3 -13   8    5.21    0.19
   3 -13   8    4.97    0.26
  -3 -13  -8    5.21    0.26
   3 -13  -8    5.02    0.20
   3 -13  -8    4.87    0.25
  -3 -13   8    4.49    0.23
  -3 -13   8    5.30    0.27
  -3  13  -8    5.25    0.29
   4 -13   8    4.11    0.15
  -4 -13  -8    4.12    0.22
   4  13   8    4.00    0.20
   0  14   8    2.84    0.22
   0 -14  -8    3.42    0.21
   0 -14  -8    2.98    0.16
  -1 -14  -8    1.11    0.16
  -1 -14  -8    0.96    0.11
  -1  14   8    0.78    0.17
  -1 -14   8    0.95    0.17
   1 -14  -8    0.96    0.15
   1 -14  -8    0.79    0.11
  -2 -14  -8   10.17    0.30
  -2 -14  -8   10.84    0.36
   2 -14  -8   11.04    0.31
   2  14   8   10.73    0.30
   2 -14  -8   10.68    0.34
  -2 -14   8   10.13    0.41
   3 -14   8    9.18    0.25
  -3 -14  -8    9.32    0.30
   3 -14  -8    9.57    0.27
   3 -14  -8    9.11    0.29
   0 -15  -8    0.58    0.13
   0 -15  -8    0.68    0.10
  -1 -15  -8    1.22    0.11
  -1 -15  -8    1.21    0.14
   1 -15  -8    1.15    0.10
   1 -15  -8    1.25    0.14
  -2 -15  -8    9.78    0.31
   2 -15  -8    9.56    0.31
   2 -15  -8    9.66    0.27
   0   0  -9    0.06    0.09
   0   0   9   -0.01    0.08
   1   0  -9   15.12    0.42
   1   0   9   15.13    0.42
   2   0   9    9.16    0.31
   2   0  -9    8.76    0.33
   2   0  -9    8.90    0.26
   3   0   9    5.49    0.27
   3   0  -9    5.28    0.21
   3   0  -9    5.81    0.31
   3   0   9    5.32    0.22
  -3   0  -9    6.11    0.30
  -3   0  -9    5.86    0.26
  -4   0  -9    3.89    0.29
   4   0  -9    4.19    0.21
   4   0   9    3.85    0.23
  -4   0  -9    3.63    0.32
   4   0   9    4.28    0.28
   4   0   9    4.03    0.21
   5   0   9    0.74    0.12
   5   0   9    0.93    0.16
   5   0  -9    0.62    0.12
  -5   0  -9    1.16    0.26
   6   0   9    0.36    0.12
   6   0  -9    0.31    0.10
  -6   0  -9    0.36    0.19
   0   1  -9    3.05    0.18
   0  -1   9    3.09    0.18
   0  -1  -9    3.30    0.18
   0   1   9    3.12    0.18
  -1   1   9    8.16    0.29
   1   1  -9    8.53    0.29
   1  -1   9    8.69    0.29
   1  -1  -9    8.80    0.29
  -1   1  -9    8.40    0.27
   1   1   9    8.34    0.29
   2   1  -9   11.62    0.37
   2   1  -9   10.96    0.31
   2  -1   9   11.34    0.36
   2   1   9   11.27    0.36
   2  -1  -9   11.02    0.31
   2  -1  -9   11.54    0.37
   3   1  -9   14.58    0.39
  -3  -1  -9   15.09    0.46
  -3  -1  -9   13.82    0.49
  -3  -1  -9   14.56    0.49
   3   1  -9   14.14    0.47
   3  -1   9   14.67    0.45
   3  -1   9   14.62    0.40
  -3  -1   9   13.77    0.45
   3   1   9   14.63    0.40
  -3   1  -9   15.05    0.45
  -3   1  -9   13.69    0.49
   3   1   9   15.64    0.46
   3  -1  -9   14.74    0.39
   3   1   9   14.24    0.46
   3  -1  -9   14.64    0.48
  -4  -1  -9    0.48    0.21
   4   1  -9    0.33    0.11
   4  -1   9    0.32    0.10
   4  -1   9    0.36    0.16
   4  -1   9    0.27    0.14
  -4   1  -9    0.43    0.25
  -4   1  -9    0.45    0.17
   4  -1  -9    0.23    0.10
   4   1   9    0.24    0.11
  -4  -1   9    0.22    0.17
   4   1   9    0.48    0.15
   5  -1   9    8.72    0.29
   5   1  -9    8.41    0.29
  -5  -1  -9    8.32    0.50
   5  -1   9    8.24    0.33
   5   1   9    8.17    0.34
   5  -1  -9    8.68    0.29
   5   1   9    8.41    0.29
  -5   1  -9    8.89    0.48
  -5  -1   9    8.17    0.38
  -6  -1  -9    0.49    0.26
   6   1  -9    0.47    0.10
   6  -1   9    0.55    0.13
   6  -1  -9    0.58    0.10
  -6   1  -9    0.59    0.20
   6   1   9    0.46    0.12
   0   2  -9    0.32    0.09
   0   2   9    0.44    0.10
   0  -2   9    0.38    0.10
   1  -2   9    1.10    0.12
   1   2  -9    1.08    0.12
  -1   2   9    0.98    0.12
   1  -2  -9    1.09    0.13
   1  -2  -9    1.03    0.09
  -1   2  -9    1.05    0.11
   1   2   9    0.91    0.11
   2  -2   9   15.71    0.47
   2   2  -9   16.97    0.48
   2   2   9   15.41    0.46
   2  -2  -9   16.04    0.41
   2  -2  -9   16.95    0.48
  -3  -2  -9    7.07    0.36
   3  -2   9    7.04    0.40
  -3  -2  -9    7.36    0.36
   3  -2   9    6.92    0.30
   3   2  -9    6.85    0.34
   3   2  -9    7.19    0.24
   3  -2   9    6.72    0.24
  -3   2  -9    7.12    0.32
  -3  -2   9    6.70    0.29
   3   2   9    6.85    0.33
   3   2   9    6.91    0.25
  -3  -2   9    6.25    0.32
   3   2   9    7.22    0.30
   3  -2  -9    6.92    0.23
   3  -2  -9    7.12    0.34
   4  -2   9   38.84    1.00
   4   2  -9   40.80    0.93
   4  -2   9   36.84    0.96
  -4  -2  -9   39.16    1.02
   4  -2   9   38.95    0.93
  -4   2  -9   38.49    0.97
   4   2   9   38.96    0.93
  -4  -2   9   38.54    0.98
   4   2   9   37.97    0.97
   4  -2  -9   41.29    0.93
  -4   2  -9   38.61    1.07
   5   2  -9    8.03    0.29
   5  -2   9    8.00    0.33
   5  -2   9    8.27    0.28
  -5  -2  -9    7.61    0.43
  -5   2  -9    8.74    0.47
   5  -2  -9    7.86    0.28
   5   2   9    8.15    0.28
  -5  -2   9    8.06    0.35
   5   2   9    8.09    0.34
   6  -2   9    5.69    0.24
   6   2  -9    5.30    0.21
   6  -2   9    5.25    0.21
   6   2   9    5.65    0.25
   6  -2  -9    5.20    0.21
  -6   2  -9    4.86    0.29
  -6  -2   9    5.49    0.27
   0  -3   9   16.32    0.44
   0   3  -9   16.02    0.43
   0   3   9   16.29    0.45
   0  -3  -9   15.28    0.40
   1  -3   9    6.67    0.26
   1   3  -9    6.81    0.26
   1  -3   9    6.75    0.22
  -1   3   9    6.25    0.26
   1  -3  -9    6.70    0.21
   1  -3  -9    6.74    0.27
   1   3   9    6.65    0.26
  -1   3  -9    6.53    0.24
   2  -3   9   21.98    0.55
   2   3  -9   22.82    0.60
   2  -3   9   21.79    0.60
   2  -3  -9   21.77    0.53
   2  -3  -9   22.04    0.60
   2   3   9   22.00    0.60
   3   3  -9    1.29    0.19
   3  -3   9    1.58    0.13
  -3  -3  -9    1.59    0.20
   3  -3   9    1.30    0.16
   3  -3   9    1.38    0.22
  -3  -3  -9    1.33    0.20
   3   3  -9    1.59    0.13
  -3  -3   9    1.43    0.16
   3  -3  -9    1.39    0.12
   3   3   9    1.39    0.17
  -3  -3   9    1.39    0.18
  -3   3  -9    1.40    0.18
   3   3   9    1.44    0.13
   3  -3  -9    1.35    0.19
   4  -3   9    0.33    0.16
   4   3  -9    0.37    0.11
  -4  -3  -9    0.30    0.20
   4  -3   9    0.28    0.10
   4  -3   9    0.25    0.14
   4  -3  -9    0.36    0.11
  -4   3  -9    0.31    0.24
  -4   3  -9    0.44    0.17
   4   3   9    0.41    0.11
   4   3   9    0.29    0.14
  -4  -3   9    0.27    0.15
  -4  -3   9    0.43    0.15
   5  -3   9   19.99    0.56
   5  -3   9   19.93    0.52
   5   3  -9   20.69    0.53
  -5  -3  -9   20.15    0.64
   5   3   9   19.11    0.52
   5  -3  -9   20.37    0.52
  -5  -3   9   20.24    0.58
   5   3   9   19.82    0.57
  -5   3  -9   20.54    0.69
   6  -3   9    1.84    0.14
   6  -3   9    1.87    0.12
   6   3  -9    1.84    0.13
   6   3   9    2.03    0.16
  -6  -3   9    1.87    0.16
  -6   3  -9    1.61    0.21
   6  -3  -9    1.83    0.13
   0   4   9   20.62    0.54
   0   4  -9   19.54    0.52
   0  -4   9   20.29    0.54
   0  -4  -9   19.37    0.49
   1   4  -9    0.75    0.12
   1  -4   9    0.58    0.11
   1  -4   9    0.82    0.10
  -1   4   9    0.67    0.12
  -1  -4  -9    0.88    0.11
   1  -4  -9    0.85    0.09
   1   4   9    0.76    0.12
  -1   4  -9    0.70    0.11
   2   4  -9   27.12    0.71
   2  -4   9   26.95    0.66
  -2   4   9   26.01    0.70
   2  -4   9   27.97    0.71
   2   4   9   27.70    0.70
   2  -4  -9   26.46    0.70
   2  -4  -9   26.64    0.64
  -2  -4   9   25.76    0.68
   3  -4   9   26.46    0.78
  -3  -4  -9   26.64    0.74
  -3  -4  -9   26.32    0.73
   3   4  -9   27.08    0.75
   3  -4   9   27.69    0.73
   3   4  -9   27.80    0.66
   3  -4   9   26.57    0.66
   3   4   9   26.89    0.67
   3   4   9   27.44    0.72
   3  -4  -9   27.68    0.66
   3  -4  -9   25.44    0.73
  -3  -4   9   27.00    0.72
  -3   4  -9   27.32    0.71
  -3  -4   9   27.47    0.71
   4  -4   9   13.27    0.46
  -4  -4  -9   13.39    0.50
   4   4  -9   13.90    0.39
   4  -4   9   13.40    0.53
  -4  -4  -9   13.79    0.48
   4  -4   9   13.49    0.43
   4  -4   9   13.27    0.39
  -4  -4   9   13.15    0.45
   4   4   9   13.43    0.45
   4   4   9   12.68    0.39
  -4  -4   9   13.39    0.45
  -4   4  -9   13.17    0.56
  -4   4  -9   13.62    0.46
   4  -4  -9   13.31    0.38
   5   4  -9    0.12    0.12
  -5  -4  -9    0.32    0.20
   5  -4   9    0.26    0.10
   5  -4   9    0.28    0.12
   5   4   9    0.41    0.15
  -5  -4   9    0.34    0.15
   5  -4  -9    0.15    0.11
  -5  -4   9    0.20    0.15
  -5   4  -9    0.41    0.22
   6  -4   9    4.34    0.21
   6  -4   9    4.34    0.18
   6   4   9    4.38    0.23
  -6   4  -9    4.16    0.26
  -6  -4   9    4.61    0.24
   0   5   9    1.79    0.15
   0   5  -9    1.84    0.14
   0  -5  -9    2.08    0.12
   0  -5   9    2.17    0.16
  -1   5   9   31.40    0.81
   1   5  -9   32.70    0.80
   1  -5   9   32.98    0.82
  -1  -5  -9   32.47    0.76
   1  -5   9   30.81    0.78
   1   5   9   32.72    0.82
   1  -5  -9   32.42    0.82
   1  -5  -9   31.78    0.75
   2  -5   9    6.96    0.37
  -2  -5  -9    7.23    0.36
   2  -5   9    6.88    0.26
   2  -5   9    6.89    0.25
  -2  -5  -9    6.64    0.33
   2  -5   9    6.91    0.30
  -2   5   9    7.34    0.30
   2   5  -9    6.81    0.31
  -2  -5  -9    6.85    0.26
  -2  -5   9    6.88    0.30
   2   5   9    7.08    0.30
   2  -5  -9    7.60    0.32
  -2  -5   9    6.46    0.29
   2  -5  -9    7.17    0.24
   2  -5  -9    6.59    0.31
   3  -5   9   19.08    0.50
  -3  -5  -9   20.02    0.61
   3  -5   9   19.59    0.58
   3  -5   9   19.62    0.64
   3   5  -9   18.90    0.60
  -3  -5  -9   18.48    0.58
   3  -5  -9   19.89    0.50
  -3   5  -9   18.92    0.55
   3   5   9   19.35    0.60
   3  -5  -9   18.81    0.59
  -3  -5   9   19.41    0.56
  -3  -5   9   19.63    0.55
   3   5   9   19.73    0.51
   4  -5   9   17.47    0.55
  -4  -5  -9   17.67    0.56
   4  -5   9   15.83    0.49
   4  -5   9   16.81    0.60
   4  -5   9   17.04    0.46
   4   5  -9   17.27    0.47
  -4  -5  -9   16.52    0.58
  -4   5  -9   17.31    0.64
  -4  -5   9   17.04    0.52
   4   5   9   17.08    0.53
   4   5   9   17.76    0.47
  -4   5  -9   17.51    0.53
  -4  -5   9   17.19    0.52
   4  -5  -9   17.11    0.46
   5   5  -9    0.28    0.12
  -5  -5  -9    0.14    0.19
   5  -5   9    0.16    0.10
   5  -5   9    0.15    0.13
   5   5   9    0.27    0.14
  -5  -5   9    0.25    0.15
   5  -5  -9    0.24    0.11
  -5  -5   9    0.43    0.15
  -5   5  -9    0.43    0.22
   6  -5   9    5.74    0.20
   6  -5   9    5.86    0.23
  -6  -5  -9    5.82    0.30
  -6   5  -9    6.31    0.32
  -6  -5   9    5.76    0.25
   6   5   9    5.92    0.24
   0  -6  -9    7.20    0.24
   0   6   9    7.44    0.30
   0  -6   9    7.67    0.30
   0   6  -9    7.55    0.29
  -1   6   9    3.56    0.23
   1  -6   9    3.97    0.39
  -1  -6  -9    4.48    0.27
  -1  -6  -9    4.12    0.20
   1   6  -9    3.78    0.21
   1  -6   9    3.58    0.24
   1  -6   9    3.76    0.20
   1  -6  -9    4.17    0.25
  -1  -6   9    4.35    0.23
   1  -6  -9    3.94    0.18
   1   6   9    4.17    0.24
   2  -6   9    4.85    0.26
  -2  -6  -9    4.04    0.22
   2  -6   9    4.46    0.22
  -2  -6  -9    4.74    0.27
   2   6  -9    4.35    0.26
   2  -6   9    4.72    0.24
  -2   6   9    4.39    0.26
  -2  -6  -9    4.63    0.28
   2  -6   9    4.55    0.29
  -2  -6   9    4.35    0.25
   2  -6  -9    4.68    0.19
  -2  -6   9    4.63    0.26
   2  -6  -9    4.59    0.28
   2   6   9    4.09    0.26
   3  -6   9    0.62    0.15
  -3  -6  -9    0.75    0.18
   3  -6   9    0.53    0.20
   3  -6   9    0.53    0.10
   3  -6   9    0.55    0.16
   3   6  -9    0.73    0.22
  -3  -6  -9    0.77    0.21
  -3   6  -9    0.82    0.17
   3  -6  -9    0.65    0.11
  -3  -6   9    0.48    0.15
   3  -6  -9    0.52    0.21
   3   6   9    0.65    0.11
  -3  -6   9    0.57    0.14
   4  -6   9    6.62    0.25
   4  -6   9    6.64    0.34
  -4  -6  -9    6.52    0.35
   4  -6   9    6.07    0.29
   4   6  -9    6.80    0.32
   4  -6   9    6.68    0.41
  -4  -6  -9    7.17    0.41
   4   6   9    6.43    0.26
  -4   6  -9    6.38    0.29
  -4   6  -9    6.52    0.40
   4  -6  -9    6.66    0.25
  -4  -6   9    6.69    0.33
  -4  -6   9    6.64    0.32
   5  -6   9    9.33    0.33
   5   6  -9    9.97    0.31
  -5  -6  -9    9.59    0.40
   5  -6   9    9.30    0.29
  -5  -6   9    9.32    0.35
  -5  -6   9    9.40    0.35
   5   6   9    9.17    0.35
  -5   6  -9    9.35    0.45
   5  -6  -9    9.45    0.29
   6  -6   9    8.95    0.28
  -6  -6  -9    8.33    0.34
   6  -6   9    8.85    0.25
   6   6   9    9.47    0.29
  -6   6  -9    9.43    0.36
  -6  -6   9    9.34    0.30
   0   7  -9    1.15    0.15
   0  -7   9    1.36    0.16
   0  -7   9    1.31    0.17
   0  -7   9    1.11    0.15
   0  -7  -9    1.31    0.13
   0   7   9    1.44    0.16
   0  -7  -9    1.27    0.19
   0  -7  -9    1.15    0.12
  -1  -7  -9    6.93    0.25
  -1  -7  -9    6.39    0.33
  -1   7   9    6.54    0.30
   1  -7   9    6.82    0.34
   1   7  -9    7.02    0.31
   1  -7   9    7.00    0.30
  -1  -7  -9    6.68    0.33
   1  -7   9    7.15    0.28
  -1  -7  -9    7.05    0.26
   1  -7  -9    7.48    0.32
  -1  -7   9    6.86    0.31
   1   7   9    6.53    0.30
   1  -7  -9    6.86    0.27
   1  -7  -9    7.08    0.24
  -1  -7   9    6.34    0.28
   2  -7   9   50.31    1.18
  -2  -7  -9   51.45    1.19
  -2  -7  -9   50.19    1.24
   2  -7   9   52.20    1.22
  -2   7   9   49.97    1.24
  -2  -7  -9   50.59    1.27
   2  -7   9   50.54    1.28
   2  -7   9   52.35    1.26
   2   7  -9   50.65    1.25
   2  -7  -9   51.89    1.26
  -2  -7   9   50.54    1.23
   2  -7  -9   51.91    1.18
   2   7   9   51.01    1.24
  -2  -7   9   51.41    1.23
   3  -7   9    2.23    0.15
   3  -7   9    2.30    0.21
  -3  -7  -9    2.23    0.22
  -3  -7  -9    2.01    0.24
   3  -7   9    1.77    0.23
   3  -7  -9    2.23    0.15
  -3   7  -9    2.28    0.20
   3  -7  -9    2.37    0.24
  -3  -7   9    2.41    0.20
  -3  -7   9    2.33    0.18
   3   7   9    2.08    0.15
   4  -7   9    7.66    0.43
  -4  -7  -9    8.48    0.42
   4  -7   9    8.79    0.30
   4  -7   9    9.35    0.39
  -4  -7  -9    9.17    0.39
  -4  -7   9    8.98    0.36
   4  -7  -9    8.67    0.29
  -4   7  -9    8.47    0.37
  -4  -7   9    8.61    0.35
   4   7   9    8.24    0.29
  -4   7  -9    8.83    0.49
   5  -7   9    4.53    0.26
   5  -7   9    4.79    0.20
   5  -7   9    4.35    0.23
  -5  -7  -9    4.43    0.27
   5   7   9    4.47    0.25
  -5  -7   9    4.13    0.26
  -5   7  -9    4.46    0.30
   5  -7  -9    4.38    0.20
  -5  -7   9    4.83    0.26
   6  -7   9    0.09    0.08
   6   7   9    0.15    0.10
  -6   7  -9    0.09    0.15
  -6  -7   9    0.08    0.10
   0  -8  -9    1.34    0.13
   0   8   9    1.49    0.18
   0  -8   9    1.37    0.17
   0  -8  -9    1.64    0.19
   0  -8  -9    1.67    0.14
   0  -8   9    1.36    0.18
   0  -8   9    1.52    0.23
   0   8  -9    1.27    0.17
   1  -8   9    8.11    0.38
  -1  -8  -9    8.11    0.29
   1  -8   9    8.75    0.35
   1   8  -9    8.32    0.37
  -1  -8  -9    8.67    0.30
  -1  -8  -9    8.50    0.38
   1  -8   9    8.48    0.32
  -1   8   9    8.63    0.35
   1  -8  -9    7.50    0.36
   1  -8  -9    8.58    0.29
   1   8   9    9.08    0.36
  -1  -8   9    9.01    0.32
   1  -8  -9    9.10    0.37
   1  -8  -9    8.74    0.30
  -1   8  -9    8.48    0.35
  -1  -8   9    8.64    0.35
  -2  -8  -9   28.12    0.81
  -2   8   9   27.97    0.76
   2  -8   9   29.16    0.77
   2  -8   9   28.20    0.80
  -2  -8  -9   27.75    0.71
   2  -8   9   28.52    0.70
  -2  -8  -9   28.78    0.76
   2  -8  -9   27.43    0.77
   2  -8  -9   28.07    0.69
   2  -8  -9   27.53    0.70
   2   8   9   28.34    0.76
  -2  -8   9   28.31    0.75
  -2  -8   9   28.83    0.74
   3  -8   9   15.40    0.42
   3  -8   9   14.59    0.51
  -3  -8  -9   15.57    0.56
   3  -8   9   15.32    0.56
  -3  -8  -9   16.26    0.52
  -3   8   9   14.59    0.50
  -3  -8  -9   14.87    0.43
   3   8   9   14.71    0.42
  -3  -8   9   14.50    0.48
  -3  -8   9   14.86    0.47
   3  -8  -9   15.40    0.42
   3  -8  -9   14.53    0.52
  -3   8  -9   14.11    0.47
  -4  -8  -9    3.89    0.28
   4  -8   9    4.21    0.27
   4  -8   9    4.24    0.21
  -4  -8  -9    4.14    0.27
   4  -8   9    4.21    0.29
   4   8   9    4.12    0.22
  -4  -8   9    4.39    0.25
  -4   8  -9    5.13    0.35
  -4  -8   9    4.25    0.24
   4  -8  -9    4.22    0.21
   5  -8   9    0.02    0.08
   5  -8   9    0.02    0.15
  -5  -8  -9    0.07    0.16
   5   8   9    0.03    0.12
  -5  -8   9   -0.05    0.12
  -5  -8   9   -0.04    0.12
   5  -8  -9    0.07    0.10
  -5   8  -9    0.13    0.18
   0   9  -9    5.06    0.28
   0  -9  -9    5.55    0.28
   0  -9   9    5.53    0.31
   0  -9  -9    5.87    0.24
   0   9   9    5.93    0.31
   0  -9  -9    5.42    0.24
  -1  -9  -9    7.56    0.36
   1  -9   9    7.25    0.34
   1  -9   9    6.83    0.37
  -1  -9  -9    8.10    0.28
  -1   9   9    7.54    0.34
  -1  -9  -9    7.33    0.29
   1  -9  -9    7.75    0.35
  -1  -9   9    7.35    0.32
   1  -9  -9    7.85    0.28
  -1  -9   9    7.52    0.34
   1   9   9    7.54    0.34
   1  -9  -9    7.87    0.28
   1  -9  -9    7.58    0.36
  -2  -9  -9    5.35    0.29
   2  -9   9    4.79    0.22
   2  -9   9    4.57    0.30
  -2  -9  -9    5.18    0.33
  -2   9   9    4.80    0.30
  -2  -9  -9    5.11    0.25
   2  -9   9    5.08    0.30
   2  -9  -9    5.34    0.23
   2  -9  -9    5.09    0.25
  -2  -9   9    5.13    0.30
   2  -9  -9    4.74    0.26
  -2  -9   9    4.64    0.26
   2  -9  -9    4.86    0.32
   2   9   9    4.71    0.30
  -3  -9  -9    3.05    0.18
  -3  -9  -9    2.82    0.24
   3  -9   9    3.14    0.17
  -3   9   9    3.56    0.25
  -3  -9  -9    3.29    0.27
   3  -9   9    3.34    0.24
   3  -9   9    2.97    0.26
   3  -9  -9    3.10    0.17
   3  -9  -9    2.84    0.25
   3   9   9    2.96    0.16
  -3  -9   9    3.24    0.22
  -3  -9   9    3.26    0.22
  -4  -9  -9   27.57    0.76
  -4  -9  -9   26.92    0.74
   4  -9   9   27.75    0.67
   4  -9   9   27.86    0.76
   4  -9   9   27.64    0.79
   4  -9  -9   26.95    0.67
  -4  -9   9   28.63    0.73
  -4   9  -9   28.17    0.82
  -4  -9   9   27.73    0.72
  -5  -9  -9    1.45    0.17
   5  -9   9    1.51    0.11
  -5  -9   9    1.66    0.15
   5   9   9    1.48    0.14
  -5   9  -9    1.50    0.20
  -5  -9   9    1.61    0.14
   0  10   9    0.11    0.15
   0 -10  -9    0.20    0.16
   0 -10  -9    0.02    0.11
   0 -10   9    0.02    0.14
   0 -10  -9    0.19    0.12
  -1  10   9   12.02    0.43
  -1 -10  -9   11.78    0.36
   1 -10   9   11.24    0.45
  -1 -10  -9   11.60    0.43
   1 -10   9   11.34    0.42
   1 -10  -9   11.64    0.35
  -1 -10   9   11.47    0.40
   1 -10  -9   11.71    0.42
   1 -10  -9   11.19    0.36
   1  10   9   11.39    0.43
  -1 -10   9   11.34    0.43
   1 -10  -9   10.84    0.43
  -2 -10  -9    4.60    0.27
  -2  10   9    4.35    0.27
   2 -10   9    5.25    0.32
  -2 -10  -9    4.69    0.24
   2 -10   9    4.72    0.29
  -2 -10  -9    4.54    0.32
   2 -10   9    4.84    0.22
   2  10   9    4.41    0.27
  -2 -10   9    4.74    0.29
   2 -10  -9    4.54    0.23
   2 -10  -9    4.69    0.25
  -2 -10   9    4.86    0.25
   2 -10  -9    4.27    0.27
   2 -10  -9    4.69    0.24
   3 -10   9   24.05    0.59
  -3  10   9   22.41    0.66
  -3 -10  -9   23.37    0.67
   3 -10   9   24.09    0.71
   3 -10   9   22.58    0.67
  -3 -10  -9   23.87    0.70
   3 -10  -9   21.53    0.67
  -3 -10   9   25.00    0.64
  -3 -10   9   24.38    0.65
   3 -10  -9   23.00    0.59
   3  10   9   23.40    0.59
  -4 -10  -9    3.04    0.23
   4 -10   9    2.90    0.15
  -4 -10  -9    2.89    0.21
   4 -10   9    2.88    0.22
  -4 -10   9    3.02    0.20
   4 -10  -9    2.70    0.16
  -4 -10   9    2.83    0.18
  -4  10  -9    2.58    0.25
   5 -10   9    5.40    0.18
  -5 -10  -9    5.39    0.26
  -5 -10   9    5.33    0.22
  -5 -10   9    5.35    0.23
   5  10   9    5.40    0.22
  -5  10  -9    4.75    0.26
   0  11   9    3.40    0.24
   0 -11   9    3.22    0.24
   0 -11  -9    2.94    0.22
   0 -11  -9    2.60    0.17
   0 -11  -9    2.94    0.19
  -1 -11  -9    2.18    0.16
   1 -11   9    2.07    0.21
  -1  11   9    2.42    0.22
   1 -11   9    2.13    0.22
  -1 -11  -9    2.23    0.21
   1 -11  -9    2.06    0.15
   1 -11  -9    2.19    0.17
   1 -11  -9    2.22    0.20
  -1 -11   9    2.14    0.21
   1  11   9    2.13    0.21
   1 -11  -9    2.06    0.22
   2 -11   9    0.57    0.11
  -2 -11  -9    0.43    0.12
  -2 -11  -9    0.37    0.16
  -2  11   9    0.53    0.17
   2 -11   9    0.64    0.16
   2 -11   9    0.45    0.19
  -2 -11   9    0.49    0.14
  -2 -11   9    0.54    0.15
   2 -11  -9    0.60    0.18
   2 -11  -9    0.71    0.17
   2 -11  -9    0.40    0.13
   2 -11  -9    0.44    0.12
   3 -11   9    8.11    0.40
   3 -11   9    8.33    0.35
  -3 -11  -9    8.60    0.40
  -3 -11  -9    8.47    0.36
   3 -11   9    8.44    0.27
  -3  11   9    7.77    0.35
  -3 -11   9    9.27    0.33
   3  11   9    8.43    0.27
   3 -11  -9    8.23    0.33
   3 -11  -9    8.43    0.37
   3 -11  -9    7.90    0.29
  -3 -11   9    8.55    0.35
   3 -11  -9    8.45    0.36
  -4 -11  -9    0.30    0.16
  -4 -11  -9    0.47    0.14
   4 -11   9    0.36    0.08
   4  11   9    0.47    0.13
  -4 -11   9    0.41    0.12
  -4 -11   9    0.23    0.13
  -4  11  -9    0.36    0.18
   0 -12  -9    8.63    0.30
   0 -12  -9    8.21    0.36
   0 -12   9    7.87    0.38
   0  12   9    8.87    0.37
   0 -12  -9    8.01    0.31
  -1 -12  -9   12.03    0.43
   1 -12   9   11.75    0.46
  -1  12   9   12.64    0.44
   1 -12   9   12.18    0.43
  -1 -12  -9   11.88    0.36
   1 -12  -9   11.82    0.41
  -1 -12   9   11.59    0.43
   1 -12  -9   12.07    0.44
   1 -12  -9   12.49    0.38
   1  12   9   12.05    0.43
   1 -12  -9   12.04    0.36
  -2 -12  -9    8.70    0.29
  -2  12   9    8.41    0.36
   2 -12   9    7.95    0.27
   2 -12   9    8.98    0.40
  -2 -12  -9    8.90    0.36
   2 -12   9    8.59    0.36
   2 -12  -9    9.05    0.37
   2 -12  -9    8.63    0.33
  -2 -12   9    8.40    0.35
  -2 -12   9    8.36    0.33
   2 -12  -9    8.54    0.30
   2 -12  -9    8.50    0.28
  -3  12   9   16.26    0.50
  -3 -12  -9   16.20    0.51
  -3 -12  -9   16.71    0.48
   3 -12   9   16.43    0.52
   3 -12   9   16.44    0.42
   3 -12   9   15.93    0.49
  -3 -12   9   16.85    0.48
   3  12   9   16.03    0.42
   3 -12  -9   15.66    0.42
  -3 -12   9   16.30    0.46
   3 -12  -9   15.50    0.44
   3 -12  -9   15.96    0.46
  -3  12  -9   16.47    0.55
  -4 -12  -9    7.04    0.31
   4 -12   9    7.91    0.22
  -4 -12  -9    7.72    0.28
   4  12   9    7.65    0.27
  -4 -12   9    7.43    0.26
  -4 -12   9    7.13    0.28
  -4  12  -9    7.22    0.35
   0 -13  -9   10.23    0.38
   0  13   9   10.57    0.40
   0 -13   9   10.46    0.40
   0 -13  -9   10.94    0.33
  -1 -13  -9    1.57    0.18
   1 -13   9    1.42    0.20
  -1 -13  -9    1.63    0.13
  -1  13   9    1.72    0.19
   1 -13  -9    1.78    0.18
   1 -13  -9    1.68    0.13
  -1 -13   9    1.83    0.19
   1  13   9    1.64    0.20
   1 -13  -9    1.88    0.16
   2 -13   9    5.13    0.31
   2 -13   9    4.76    0.28
  -2 -13  -9    5.17    0.21
  -2 -13  -9    4.63    0.27
  -2  13   9    5.20    0.28
   2 -13  -9    5.17    0.26
  -2 -13   9    4.57    0.27
   2 -13  -9    5.12    0.21
   2 -13  -9    4.97    0.23
   3 -13   9    0.37    0.15
   3 -13   9    0.39    0.08
  -3 -13  -9    0.31    0.13
  -3  13  -9    0.25    0.17
   3 -13  -9    0.49    0.13
  -3 -13   9    0.32    0.13
  -3 -13   9    0.52    0.12
   3 -13  -9    0.38    0.10
   0  14   9    2.61    0.28
   0 -14  -9    2.87    0.15
   0 -14  -9    2.89    0.19
   0 -14   9    2.58    0.21
  -1 -14  -9   13.52    0.36
  -1 -14  -9   12.60    0.40
   1 -14   9   13.38    0.44
   1 -14  -9   13.34    0.36
  -1 -14   9   12.60    0.42
   1 -14  -9   13.14    0.40
  -2 -14  -9    2.07    0.16
  -2 -14  -9    2.07    0.12
   2 -14  -9    1.94    0.16
   2  14   9    2.00    0.11
   2 -14  -9    1.85    0.12
  -2 -14   9    2.27    0.18
   0 -15  -9    4.50    0.18
   0 -15  -9    4.33    0.22
  -1 -15  -9    4.46    0.22
  -1 -15  -9    4.31    0.17
   1 -15  -9    4.22    0.22
   1 -15  -9    4.75    0.17
   0   0 -10   12.88    0.38
   0   0  10   12.99    0.38
   1   0  10    4.00    0.21
  -1   0  10    4.79    0.23
   1   0 -10    4.58    0.24
   2   0  10    3.44    0.21
   2   0 -10    3.22    0.21
   2   0 -10    3.22    0.17
  -2   0 -10    3.43    0.22
  -3   0 -10    3.14    0.24
   3   0 -10    3.20    0.16
  -3   0 -10    3.02    0.21
   3   0  10    3.27    0.22
   3   0  10    3.38    0.17
   3   0  10    2.71    0.20
   3   0 -10    3.02    0.25
   4   0 -10    2.31    0.15
   4   0  10    2.55    0.15
   4   0  10    2.31    0.19
  -4   0 -10    2.25    0.26
   4   0  10    2.31    0.22
   5   0 -10    2.66    0.16
   5   0  10    2.65    0.16
  -5   0 -10    2.71    0.29
   5   0  10    2.95    0.19
   6   0  10    0.32    0.11
   0   1 -10  115.72    2.57
   0   1  10  113.24    2.58
   0  -1  10  113.77    2.58
   1  -1  10    3.89    0.21
  -1   1  10    3.80    0.21
   1   1 -10    4.33    0.23
   1   1  10    3.65    0.21
   1  -1 -10    4.04    0.21
  -2  -1 -10    0.50    0.16
   2  -1  10    0.37    0.11
   2   1 -10    0.40    0.15
   2  -1 -10    0.36    0.15
  -2   1 -10    0.35    0.16
   2  -1 -10    0.37    0.09
   2   1  10    0.36    0.11
   3   1 -10    8.78    0.27
   3   1 -10    8.94    0.39
  -3  -1 -10    8.36    0.39
   3  -1  10    7.88    0.43
   3  -1  10    7.74    0.27
  -3  -1 -10    8.46    0.35
   3  -1  10    7.97    0.33
  -3  -1  10    7.33    0.32
   3   1  10    8.29    0.28
  -3   1 -10    8.05    0.38
   3   1  10    8.39    0.33
   3   1  10    7.54    0.33
  -3   1 -10    7.85    0.48
   3  -1 -10    8.30    0.39
   3  -1 -10    7.87    0.26
  -3   1 -10    7.74    0.34
   4  -1  10    3.69    0.25
   4   1 -10    3.08    0.17
   4  -1  10    3.53    0.22
  -4  -1 -10    3.61    0.28
   4  -1  10    3.93    0.19
  -4   1 -10    3.38    0.23
  -4   1 -10    3.62    0.32
   4   1  10    2.94    0.21
   4  -1 -10    3.16    0.17
   4   1  10    3.31    0.18
   5   1 -10    0.46    0.12
   5  -1  10    0.35    0.14
   5  -1  10    0.38    0.11
   5   1  10    0.41    0.10
  -5   1 -10    0.45    0.24
   5  -1 -10    0.56    0.12
   5   1  10    0.47    0.14
   6  -1  10    0.68    0.12
   6  -1  10    0.74    0.10
   6   1  10    0.72    0.12
  -6   1 -10    0.65    0.19
   0  -2  10   -0.04    0.09
   0   2  10    0.01    0.09
   0   2 -10    0.10    0.10
   1  -2  10   14.59    0.42
  -1   2  10   13.57    0.42
   1   2 -10   14.49    0.42
   1   2  10   13.46    0.41
   1  -2 -10   14.09    0.36
   1  -2 -10   13.67    0.42
  -1   2 -10   14.53    0.41
   2   2 -10   19.75    0.57
  -2  -2 -10   19.46    0.58
   2  -2  10   20.36    0.56
   2   2  10   20.16    0.56
   2  -2 -10   19.93    0.49
  -2   2 -10   19.34    0.57
   2  -2 -10   19.11    0.57
  -2  -2  10   20.58    0.55
  -3  -2 -10    2.26    0.22
  -3  -2 -10    3.00    0.24
   3  -2  10    2.50    0.14
  -3  -2 -10    2.48    0.21
   3   2 -10    2.36    0.23
   3   2 -10    2.80    0.15
   3  -2  10    2.70    0.20
   3  -2  10    1.95    0.25
  -3   2 -10    2.69    0.30
   3   2  10    2.54    0.20
  -3  -2  10    2.39    0.21
   3  -2 -10    2.52    0.24
   3   2  10    2.30    0.15
   3   2  10    2.58    0.20
   3  -2 -10    2.43    0.14
  -3  -2  10    2.60    0.19
  -3   2 -10    2.62    0.20
  -4  -2 -10   19.99    0.64
   4   2 -10   20.02    0.52
   4  -2  10   19.09    0.56
   4  -2  10   20.01    0.60
   4  -2  10   20.54    0.53
   4   2  10   19.72    0.52
   4  -2 -10   20.83    0.52
  -4   2 -10   20.02    0.59
  -4   2 -10   19.87    0.70
  -4  -2  10   19.77    0.59
   4   2  10   20.57    0.58
   5  -2  10    7.27    0.26
   5  -2  10    7.33    0.31
  -5  -2 -10    7.26    0.42
   5   2 -10    7.39    0.27
   5  -2 -10    7.22    0.26
   5   2  10    6.88    0.26
  -5  -2  10    7.53    0.34
  -5   2 -10    7.41    0.45
   5   2  10    8.10    0.31
   6  -2  10    4.26    0.18
   6  -2  10    4.13    0.21
  -6   2 -10    4.25    0.26
   6   2  10    4.43    0.22
   0   3  10   19.16    0.52
   0   3 -10   18.83    0.51
   0  -3  10   18.40    0.51
  -1   3  10   22.56    0.61
   1  -3  10   22.72    0.62
   1   3 -10   23.13    0.61
   1   3  10   23.62    0.62
  -1   3 -10   23.81    0.60
   1  -3 -10   22.79    0.55
   2   3 -10   13.27    0.43
  -2  -3 -10   13.24    0.45
   2  -3  10   12.85    0.37
   2  -3  10   13.35    0.42
  -2   3 -10   12.22    0.44
   2   3  10   12.89    0.36
   2  -3 -10   12.89    0.44
  -2  -3  10   13.12    0.40
   2   3  10   13.34    0.41
   2  -3 -10   12.89    0.35
   3  -3  10    9.20    0.30
  -3  -3 -10    9.40    0.41
   3  -3  10    9.65    0.37
   3   3 -10    9.79    0.42
   3  -3  10    9.29    0.44
  -3  -3 -10    9.09    0.40
  -3  -3  10    8.36    0.36
  -3   3 -10    9.77    0.37
   3  -3 -10    9.20    0.29
   3   3  10    9.57    0.36
  -3  -3  10    9.77    0.35
   3  -3 -10    9.52    0.41
   3   3  10    9.12    0.30
  -4  -3 -10   13.96    0.51
   4  -3  10   13.20    0.47
   4  -3  10   14.23    0.39
   4   3 -10   14.00    0.40
   4  -3  10   13.41    0.44
   4   3  10   13.22    0.44
  -4  -3  10   13.73    0.45
   4   3  10   13.27    0.39
   4  -3 -10   14.31    0.39
  -4  -3  10   13.10    0.45
  -4   3 -10   13.93    0.46
  -4   3 -10   14.17    0.59
   5  -3  10    2.68    0.15
  -5  -3 -10    2.76    0.25
   5   3 -10    2.55    0.16
   5  -3  10    2.41    0.18
   5   3  10    2.31    0.19
   5  -3 -10    2.24    0.15
  -5   3 -10    2.23    0.27
   5   3  10    2.19    0.15
  -5  -3  10    2.41    0.20
   6  -3  10    0.56    0.09
   6  -3  10    0.43    0.11
  -6  -3  10    0.62    0.13
   6   3  10    0.68    0.12
  -6   3 -10    0.47    0.18
   0  -4 -10    5.11    0.20
   0   4  10    4.87    0.24
   0  -4  10    5.20    0.24
   0   4 -10    5.08    0.25
   1  -4  10   20.87    0.56
   1   4 -10   20.10    0.56
  -1  -4 -10   19.12    0.58
  -1   4  10   19.41    0.56
  -1  -4  10   19.82    0.54
  -1   4 -10   21.05    0.55
   1  -4 -10   20.08    0.50
   1   4  10   20.41    0.56
   2  -4  10   15.72    0.45
   2  -4  10   15.53    0.43
   2  -4  10   16.56    0.49
  -2   4  10   15.77    0.48
   2   4 -10   15.80    0.50
   2  -4  10   15.63    0.54
  -2  -4 -10   15.75    0.52
  -2  -4 -10   16.41    0.51
  -2  -4 -10   15.90    0.44
   2   4  10   15.88    0.43
  -2  -4  10   16.00    0.47
   2  -4 -10   15.31    0.49
  -2   4 -10   16.85    0.49
   2  -4 -10   16.15    0.42
   2   4  10   16.16    0.49
  -2  -4  10   15.15    0.48
   3   4 -10   11.12    0.47
   3  -4  10   11.25    0.48
  -3  -4 -10   11.96    0.44
   3  -4  10   11.52    0.41
   3  -4  10   11.66    0.34
  -3  -4 -10   12.00    0.46
  -3  -4  10   11.44    0.40
   3   4  10   11.27    0.41
  -3  -4  10   11.54    0.40
   3  -4 -10   11.66    0.34
   3  -4 -10   10.57    0.46
  -3   4 -10   11.91    0.41
   3   4  10   11.68    0.35
   4  -4  10   11.36    0.34
  -4  -4 -10   11.00    0.47
   4  -4  10   11.10    0.40
   4   4 -10   11.52    0.35
   4  -4  10   11.19    0.42
   4  -4  10   10.55    0.48
  -4  -4  10   11.00    0.41
  -4   4 -10   11.06    0.41
  -4  -4  10   10.79    0.39
   4  -4 -10   11.06    0.34
   4   4  10   10.53    0.40
   4   4  10   10.80    0.34
  -4   4 -10   11.24    0.52
   5  -4  10    2.35    0.17
  -5  -4 -10    2.26    0.24
   5   4 -10    2.98    0.16
   5  -4  10    2.59    0.15
   5  -4 -10    2.48    0.15
   5   4  10    2.50    0.15
  -5   4 -10    3.18    0.28
   5   4  10    2.99    0.20
  -5  -4  10    2.50    0.19
   6  -4  10    2.69    0.15
   6  -4  10    2.37    0.15
   6   4  10    2.78    0.16
  -6  -4  10    2.46    0.16
  -6   4 -10    2.79    0.22
   0   5 -10    0.01    0.11
   0  -5 -10   -0.07    0.09
   0  -5  10   -0.07    0.11
   0  -5  10    0.07    0.11
   0   5  10   -0.05    0.10
  -1   5  10    5.09    0.26
  -1  -5 -10    5.40    0.28
  -1  -5 -10    4.80    0.24
   1  -5  10    5.24    0.32
   1  -5  10    4.99    0.23
  -1  -5 -10    5.07    0.22
   1   5 -10    5.07    0.27
   1  -5  10    4.97    0.27
   1  -5  10    5.11    0.26
  -1  -5  10    5.01    0.28
  -1   5 -10    5.66    0.26
   1   5  10    5.18    0.26
  -1   5 -10    5.21    0.26
   1  -5 -10    5.17    0.20
  -1  -5  10    4.86    0.25
  -2  -5 -10    1.83    0.15
   2   5 -10    1.61    0.19
   2  -5  10    1.81    0.18
  -2  -5 -10    2.03    0.22
  -2  -5 -10    1.82    0.21
   2  -5  10    1.88    0.16
   2  -5  10    1.95    0.14
  -2   5  10    1.73    0.17
   2  -5  10    1.60    0.22
  -2  -5  10    1.58    0.17
   2   5  10    1.80    0.13
   2   5  10    1.33    0.16
   2  -5 -10    1.81    0.13
  -2  -5  10    1.75    0.16
  -3  -5 -10   51.94    1.31
  -3  -5 -10   54.24    1.34
   3  -5  10   55.93    1.34
   3  -5  10   53.93    1.37
   3  -5  10   54.26    1.26
   3  -5 -10   55.09    1.25
   3   5  10   54.28    1.32
   3   5  10   54.69    1.26
  -3  -5  10   54.15    1.30
  -3  -5  10   53.21    1.30
  -3   5 -10   53.43    1.28
   4  -5  10   14.59    0.54
   4  -5  10   14.27    0.49
   4  -5  10   14.03    0.40
  -4  -5 -10   13.92    0.49
  -4  -5 -10   14.19    0.53
  -4  -5  10   13.56    0.46
   4  -5 -10   13.78    0.39
   4   5  10   13.89    0.40
  -4   5 -10   13.97    0.47
  -4  -5  10   13.86    0.45
   4   5  10   13.83    0.46
  -4   5 -10   14.12    0.58
   5   5 -10    2.84    0.16
  -5  -5 -10    2.34    0.23
   5  -5  10    2.23    0.16
   5  -5  10    2.92    0.15
   5  -5 -10    2.64    0.15
  -5  -5  10    2.36    0.19
   5   5  10    2.87    0.19
  -5  -5  10    2.64    0.19
  -5   5 -10    2.89    0.27
   5   5  10    2.35    0.15
   6  -5  10    0.15    0.10
   6  -5  10    0.22    0.08
  -6   5 -10    0.33    0.16
   6   5  10    0.29    0.11
  -6  -5  10    0.24    0.11
   0  -6  10    2.59    0.18
   0  -6 -10    2.92    0.15
   0   6  10    2.89    0.20
   0  -6  10    2.88    0.20
   0   6 -10    2.75    0.19
   0  -6 -10    2.94    0.17
   0  -6  10    2.65    0.21
  -1  -6 -10   11.69    0.45
   1  -6  10   12.67    0.41
   1  -6  10   11.71    0.44
   1   6 -10   11.84    0.42
  -1  -6 -10   12.03    0.46
  -1  -6 -10   11.88    0.36
  -1   6  10   12.82    0.42
  -1  -6 -10   12.50    0.36
   1  -6  10   11.51    0.38
   1  -6 -10   12.21    0.34
  -1  -6  10   11.78    0.39
   1   6  10   12.33    0.41
  -1  -6  10   11.78    0.40
   1  -6 -10   12.09    0.37
  -1   6 -10   11.88    0.40
  -1   6 -10   10.52    0.54
   2  -6  10   33.76    0.85
   2  -6  10   34.55    0.92
  -2   6  10   32.82    0.88
   2  -6  10   35.05    0.89
  -2  -6 -10   34.07    0.91
   2   6 -10   33.82    0.89
  -2  -6 -10   33.42    0.82
   2  -6  10   34.17    0.82
  -2  -6 -10   33.96    0.88
   2  -6 -10   35.06    0.81
  -2  -6  10   32.73    0.85
  -2  -6  10   32.72    0.86
   2   6  10   34.41    0.88
   3  -6  10    8.89    0.44
  -3  -6 -10    8.40    0.42
   3  -6  10    8.11    0.36
  -3  -6 -10    8.44    0.38
   3  -6  10    8.17    0.28
  -3   6 -10    8.03    0.35
  -3  -6  10    8.04    0.34
  -3  -6  10    8.07    0.35
   3  -6 -10    8.34    0.28
   3   6  10    7.99    0.29
   4  -6  10    3.36    0.25
  -4  -6 -10    3.31    0.25
   4  -6  10    3.26    0.17
   4  -6  10    3.37    0.28
  -4  -6 -10    3.04    0.27
   4  -6 -10    3.49    0.19
   4   6  10    3.36    0.23
  -4  -6  10    3.55    0.23
   4   6  10    3.24    0.17
  -4  -6  10    3.18    0.21
  -4   6 -10    3.51    0.23
  -4   6 -10    3.17    0.30
   5  -6  10    1.05    0.23
   5  -6  10    0.96    0.11
   5  -6  10    0.90    0.14
  -5  -6 -10    0.92    0.18
  -5  -6  10    1.13    0.15
   5  -6 -10    1.08    0.12
   5   6  10    0.95    0.15
  -5  -6  10    0.99    0.15
  -5   6 -10    0.96    0.22
   6   6  10    5.25    0.21
  -6  -6  10    5.06    0.21
  -6   6 -10    5.43    0.28
   0  -7  10   18.67    0.55
   0  -7  10   18.49    0.54
   0   7  10   19.87    0.56
   0  -7  10   18.44    0.56
   0  -7 -10   17.70    0.57
   0   7 -10   18.92    0.55
   0  -7 -10   19.19    0.50
   0  -7 -10   18.52    0.49
   1   7 -10   20.33    0.62
  -1  -7 -10   20.64    0.62
   1  -7  10   20.67    0.63
  -1  -7 -10   21.00    0.65
   1  -7  10   22.08    0.61
  -1  -7 -10   21.89    0.55
  -1   7  10   21.24    0.62
  -1  -7 -10   20.96    0.55
   1  -7  10   21.32    0.58
   1   7  10   22.31    0.62
   1  -7 -10   20.50    0.55
   1  -7 -10   21.86    0.54
  -1  -7  10   20.68    0.60
  -1   7 -10   20.54    0.60
  -1  -7  10   20.39    0.58
  -2  -7 -10    3.06    0.18
  -2   7  10    2.62    0.21
  -2  -7 -10    2.80    0.26
   2  -7  10    2.66    0.16
  -2  -7 -10    3.03    0.24
   2  -7  10    2.31    0.24
   2  -7  10    2.90    0.22
  -2  -7  10    3.04    0.22
   2   7  10    2.40    0.21
   2  -7 -10    2.59    0.16
  -2  -7  10    2.54    0.19
   3  -7  10   10.83    0.47
   3  -7  10   10.30    0.41
  -3  -7 -10   10.69    0.43
   3  -7  10   10.33    0.32
  -3  -7 -10   10.46    0.47
  -3  -7  10   10.92    0.38
  -3   7 -10   10.91    0.39
   3  -7 -10   10.82    0.33
   3   7  10   10.45    0.33
  -3  -7  10   10.41    0.39
   4  -7  10    3.55    0.28
  -4  -7 -10    3.68    0.27
   4  -7  10    3.90    0.26
   4  -7  10    4.15    0.20
  -4  -7 -10    3.81    0.26
  -4   7 -10    3.98    0.23
  -4  -7  10    3.58    0.22
   4   7  10    3.66    0.24
  -4   7 -10    4.03    0.32
   4  -7 -10    3.70    0.20
  -4  -7  10    4.03    0.23
   4   7  10    3.72    0.20
  -5  -7 -10    3.57    0.23
   5  -7  10    3.82    0.17
  -5   7 -10    3.72    0.27
  -5  -7  10    3.97    0.23
   5  -7 -10    3.64    0.19
   5   7  10    3.86    0.23
  -5  -7  10    3.91    0.20
   0  -8  10   13.16    0.44
   0   8 -10   13.43    0.47
   0  -8  10   13.57    0.47
   0   8  10   13.53    0.46
   0  -8 -10   13.04    0.47
   0  -8 -10   14.06    0.40
   0  -8 -10   14.15    0.39
   1  -8  10   12.08    0.42
  -1  -8 -10   12.03    0.44
   1  -8  10   11.27    0.45
  -1  -8 -10   11.66    0.36
  -1  -8 -10   10.79    0.54
  -1  -8 -10   11.21    0.37
  -1   8  10   11.70    0.43
   1  -8 -10   11.98    0.35
   1   8  10   12.37    0.43
  -1  -8  10   11.36    0.39
   1  -8 -10   12.46    0.36
  -1  -8  10   11.59    0.42
  -2   8  10   24.91    0.72
   2  -8  10   25.66    0.64
  -2  -8 -10   24.81    0.71
  -2  -8 -10   25.87    0.65
  -2  -8 -10   26.03    0.76
   2  -8  10   26.86    0.72
   2  -8  10   25.31    0.76
   2  -8 -10   24.03    0.72
  -2  -8  10   25.50    0.70
  -2  -8  10   26.43    0.69
   2   8  10   25.00    0.71
   2  -8 -10   25.65    0.64
  -3  -8 -10    3.34    0.25
   3  -8  10    3.70    0.20
   3  -8  10    3.50    0.28
   3  -8  10    3.28    0.24
  -3  -8 -10    3.44    0.28
  -3   8  10    3.20    0.30
  -3   8 -10    3.42    0.22
   3   8  10    3.80    0.20
   3  -8 -10    3.30    0.18
  -3  -8  10    3.53    0.23
  -3  -8  10    3.60    0.22
  -4  -8 -10    3.78    0.25
   4  -8  10    4.22    0.20
  -4  -8 -10    4.22    0.27
   4  -8  10    4.31    0.26
   4  -8  10    3.69    0.27
  -4  -8  10    4.14    0.22
  -4   8 -10    4.35    0.32
   4  -8 -10    4.08    0.20
  -4  -8  10    4.35    0.26
   4   8  10    4.09    0.21
   4   8  10    4.82    0.28
  -5  -8 -10    3.82    0.23
   5  -8  10    4.67    0.17
   5   8  10    4.52    0.23
  -5   8 -10    4.53    0.27
  -5  -8  10    4.12    0.23
  -5  -8  10    4.57    0.23
   0   9  10    0.18    0.14
   0  -9 -10    0.04    0.17
   0  -9 -10    0.04    0.12
   0  -9  10    0.23    0.16
   0  -9 -10    0.23    0.12
   1  -9  10    5.55    0.34
   1  -9  10    5.62    0.31
  -1  -9 -10    5.64    0.27
  -1   9  10    6.04    0.31
  -1  -9 -10    5.94    0.34
  -1  -9 -10    5.82    0.26
   1  -9 -10    5.33    0.28
   1   9  10    5.47    0.31
   1  -9 -10    5.90    0.25
  -1  -9  10    5.68    0.28
   1  -9 -10    5.49    0.25
  -1  -9  10    5.15    0.31
  -2  -9 -10    1.85    0.15
   2  -9  10    1.65    0.24
  -2  -9 -10    2.02    0.22
  -2  -9 -10    1.99    0.26
   2  -9  10    2.07    0.15
  -2   9  10    1.63    0.20
   2  -9  10    1.82    0.20
   2   9  10    1.78    0.20
  -2  -9  10    1.75    0.18
  -2  -9  10    1.67    0.17
   2  -9 -10    1.82    0.16
   2  -9 -10    1.64    0.15
   3  -9  10   16.22    0.56
   3  -9  10   15.07    0.50
   3  -9  10   15.49    0.42
  -3  -9 -10   15.82    0.50
  -3  -9 -10   14.64    0.54
  -3   9  10   13.70    0.49
   3  -9 -10   15.22    0.42
   3   9  10   14.99    0.42
  -3  -9  10   15.68    0.48
  -3  -9  10   15.59    0.47
  -3   9 -10   14.92    0.47
  -4  -9 -10    1.75    0.19
  -4  -9 -10    1.58    0.20
   4  -9  10    1.77    0.21
   4  -9  10    1.90    0.13
   4  -9  10    1.74    0.19
   4   9  10    1.62    0.13
   4   9  10    1.74    0.17
  -4   9 -10    1.32    0.23
   4  -9 -10    1.71    0.14
  -4  -9  10    1.89    0.16
  -4  -9  10    1.44    0.16
  -5  -9 -10    2.93    0.19
   5  -9  10    3.33    0.14
  -5   9 -10    3.26    0.22
  -5  -9  10    3.22    0.17
   5   9  10    2.86    0.16
  -5  -9  10    3.20    0.20
   0  10  10   -0.03    0.15
   0 -10 -10    0.14    0.11
   0 -10 -10   -0.11    0.12
   0 -10  10    0.01    0.15
   0 -10 -10   -0.02    0.16
  -1 -10 -10   11.27    0.35
   1 -10  10   10.40    0.41
  -1  10  10   10.70    0.42
   1 -10  10   10.78    0.44
  -1 -10 -10   10.87    0.42
   1 -10 -10   10.49    0.34
   1 -10 -10   10.94    0.34
  -1 -10  10   10.66    0.38
   1  10  10   10.44    0.41
  -1 -10  10   10.86    0.41
   1 -10 -10   10.92    0.41
  -2 -10 -10    3.06    0.29
   2 -10  10    3.05    0.23
  -2 -10 -10    2.76    0.23
  -2  10  10    3.23    0.24
   2 -10  10    3.41    0.17
  -2 -10 -10    3.41    0.18
   2 -10  10    3.05    0.25
   2  10  10    3.25    0.24
   2 -10 -10    3.26    0.18
  -2 -10  10    3.27    0.20
  -2 -10  10    3.06    0.22
   2 -10 -10    2.89    0.18
   2 -10 -10    2.79    0.22
   3 -10  10    2.27    0.21
  -3 -10 -10    1.90    0.23
  -3  10  10    1.87    0.21
   3 -10  10    2.16    0.13
  -3 -10 -10    2.08    0.20
   3 -10  10    2.09    0.23
  -3 -10  10    2.04    0.18
   3  10  10    2.12    0.14
  -3 -10  10    2.24    0.17
   3 -10 -10    1.82    0.15
   4 -10  10    2.20    0.19
  -4 -10 -10    2.23    0.19
   4 -10  10    2.32    0.13
  -4 -10 -10    2.58    0.21
   4 -10 -10    2.21    0.16
   4  10  10    2.51    0.18
  -4 -10  10    2.31    0.16
  -4 -10  10    2.50    0.18
  -4  10 -10    2.60    0.24
   0 -11 -10   11.30    0.42
   0 -11 -10   11.97    0.36
   0 -11  10   11.86    0.44
   0 -11 -10   11.14    0.36
   0  11  10   11.19    0.43
   1 -11  10    4.47    0.30
  -1 -11 -10    4.52    0.23
  -1 -11 -10    4.61    0.27
  -1  11  10    4.41    0.27
   1 -11  10    4.37    0.29
   1 -11 -10    4.29    0.23
   1 -11 -10    4.73    0.24
   1 -11 -10    4.48    0.25
   1  11  10    4.37    0.29
  -1 -11  10    4.64    0.26
  -2 -11 -10   11.19    0.41
  -2  11  10   11.23    0.42
   2 -11  10   11.61    0.45
  -2 -11 -10   10.99    0.34
   2 -11  10   10.83    0.33
   2 -11  10   11.33    0.41
   2 -11 -10   11.50    0.35
   2 -11 -10   10.76    0.39
  -2 -11  10   11.02    0.40
  -2 -11  10   11.33    0.38
   2 -11 -10   11.77    0.35
  -3 -11 -10    2.03    0.19
  -3  11  10    2.48    0.21
  -3 -11 -10    2.57    0.23
   3 -11  10    2.59    0.14
   3 -11  10    2.25    0.22
   3 -11  10    2.51    0.20
  -3 -11  10    2.43    0.19
   3  11  10    2.44    0.14
   3 -11 -10    2.71    0.16
  -3 -11  10    2.53    0.18
  -4 -11 -10    0.34    0.15
   4 -11  10    0.48    0.08
  -4 -11 -10    0.29    0.13
   4  11  10    0.43    0.12
  -4  11 -10    0.39    0.17
  -4 -11  10    0.40    0.11
  -4 -11  10    0.63    0.13
   0 -12 -10    0.45    0.13
   0 -12 -10    0.49    0.12
   0  12  10    0.58    0.17
   0 -12  10    0.56    0.16
   0 -12 -10    0.76    0.17
   1 -12  10    3.23    0.24
  -1 -12 -10    3.12    0.17
  -1 -12 -10    3.58    0.23
  -1  12  10    3.29    0.23
   1 -12 -10    3.25    0.17
  -1 -12  10    3.15    0.22
   1  12  10    3.00    0.22
   1 -12 -10    3.32    0.22
   1 -12 -10    2.98    0.18
   2 -12  10    8.36    0.35
   2 -12  10    8.68    0.38
  -2 -12 -10    8.78    0.34
  -2  12  10    8.62    0.35
  -2 -12 -10    8.36    0.28
   2 -12 -10    8.49    0.33
  -2 -12  10    8.82    0.34
   2  12  10    8.44    0.27
   2 -12 -10    8.54    0.30
  -2 -12  10    8.52    0.32
   2 -12 -10    8.63    0.28
   3 -12  10    0.28    0.15
   3 -12  10    0.18    0.08
  -3 -12 -10    0.21    0.14
  -3 -12  10    0.19    0.11
  -3  12 -10    0.01    0.17
   3  12  10    0.24    0.09
  -3 -12  10    0.16    0.13
   0  13  10    1.84    0.18
   0 -13 -10    1.50    0.17
   0 -13  10    1.85    0.19
   0 -13 -10    1.87    0.14
   1 -13  10    1.91    0.20
  -1 -13 -10    1.83    0.18
  -1 -13 -10    2.24    0.14
  -1  13  10    2.05    0.19
   1 -13 -10    2.30    0.16
   1 -13 -10    1.96    0.18
   1 -13 -10    2.22    0.14
  -1 -13  10    2.58    0.20
   1  13  10    2.39    0.21
  -2 -13 -10    0.83    0.15
   2 -13  10    0.55    0.16
  -2 -13 -10    0.76    0.10
  -2 -13  10    0.76    0.15
   2 -13 -10    0.80    0.11
   2 -13 -10    0.79    0.15
   2  13  10    0.63    0.09
   3 -13  10    1.92    0.15
  -3 -13 -10    1.82    0.15
  -3  13 -10    1.72    0.19
  -3 -13  10    2.18    0.16
   0 -14 -10    3.10    0.17
   0 -14  10    3.58    0.21
   0 -14 -10    2.95    0.18
  -1 -14 -10    0.10    0.13
   1 -14  10    0.13    0.15
  -1 -14 -10    0.20    0.08
   1 -14 -10    0.23    0.09
  -1 -14  10    0.23    0.13
   1 -14 -10    0.20    0.13
  -2 -14 -10    5.23    0.24
  -2 -14  10    5.41    0.26
   2 -14 -10    4.95    0.27
   2 -14 -10    5.21    0.19
   2  14  10    5.05    0.18
   0 -15 -10    2.39    0.15
   0 -15 -10    2.32    0.11
   0   0  11    0.00    0.10
  -1   0 -11    5.37    0.27
   1   0 -11    5.35    0.29
  -1   0  11    5.13    0.28
  -1   0  11    5.33    0.25
   1   0  11    5.61    0.25
   2   0  11    6.05    0.28
  -2   0  11    5.31    0.29
  -2   0 -11    6.23    0.31
   2   0 -11    5.90    0.33
   2   0  11    6.11    0.23
  -2   0 -11    5.78    0.26
   3   0  11    0.37    0.14
  -3   0 -11    0.28    0.18
   3   0  11    0.44    0.10
   3   0 -11    0.36    0.21
   3   0 -11    0.33    0.11
  -3   0 -11    0.35    0.16
   4   0 -11    0.11    0.11
   4   0  11    0.22    0.15
   4   0  11    0.02    0.16
   4   0  11    0.10    0.10
  -4   0 -11    0.03    0.21
   5   0  11    0.13    0.13
   5   0 -11    0.27    0.11
   5   0  11    0.21    0.10
   6   0  11    5.18    0.19
   6   0  11    5.44    0.22
   0  -1  11    0.12    0.10
   0   1  11    0.02    0.10
   0   1 -11    0.12    0.16
   0  -1  11   -0.02    0.14
   0   1 -11    0.06    0.13
  -1   1  11    1.51    0.17
   1   1 -11    1.46    0.17
  -1  -1 -11    1.86    0.18
   1  -1  11    1.77    0.15
  -1   1  11    1.60    0.15
  -1  -1  11    1.40    0.15
  -1   1 -11    1.56    0.16
   1  -1 -11    1.98    0.24
   1   1  11    1.22    0.14
   1  -1 -11    1.52    0.17
  -2  -1 -11    5.57    0.26
   2  -1  11    5.46    0.23
  -2  -1 -11    6.07    0.31
  -2   1  11    5.58    0.31
   2  -1  11    6.01    0.27
   2   1 -11    5.82    0.33
  -2   1 -11    5.93    0.26
   2  -1 -11    5.60    0.21
   2   1  11    5.32    0.22
   2   1  11    5.94    0.28
  -2  -1  11    5.73    0.28
   2  -1 -11    5.69    0.29
  -2   1 -11    5.68    0.31
   3  -1  11    7.42    0.26
   3   1 -11    7.16    0.25
   3  -1  11    7.46    0.33
   3   1 -11    6.25    0.35
  -3  -1 -11    7.10    0.38
  -3  -1 -11    7.04    0.34
   3  -1 -11    7.45    0.25
   3  -1 -11    7.02    0.41
  -3   1 -11    6.71    0.33
  -3  -1  11    6.90    0.33
   3   1  11    7.51    0.26
  -3   1 -11    7.46    0.38
   3   1  11    7.19    0.32
   4  -1  11   22.05    0.62
   4   1 -11   23.93    0.57
   4  -1  11   23.10    0.66
  -4  -1 -11   21.96    0.68
   4  -1  11   22.94    0.58
   4   1  11   22.36    0.58
   4   1  11   21.26    0.65
   4  -1 -11   22.72    0.57
   4   1  11   22.79    0.62
  -4   1 -11   21.50    0.76
   5  -1  11   24.80    0.64
   5  -1  11   24.82    0.61
   5   1 -11   24.80    0.61
   5   1  11   24.43    0.61
  -5   1 -11   24.40    0.75
   5  -1 -11   24.31    0.61
   5   1  11   24.87    0.65
   6  -1  11    0.76    0.11
   6  -1  11    0.73    0.09
   6   1  11    0.90    0.12
   0  -2  11    3.04    0.20
   0   2  11    3.23    0.21
   0   2 -11    3.17    0.20
   0  -2 -11    3.41    0.25
   0  -2  11    3.34    0.20
  -1  -2 -11   45.81    1.10
  -1   2  11   44.18    1.09
   1   2 -11   46.50    1.11
   1  -2  11   45.28    1.10
   1  -2 -11   46.08    1.11
  -1  -2  11   44.89    1.09
  -1   2 -11   44.63    1.09
   1   2  11   45.51    1.11
   2  -2  11   25.76    0.68
  -2  -2 -11   24.65    0.69
   2   2 -11   25.39    0.70
  -2  -2 -11   23.52    0.66
   2  -2  11   24.96    0.62
   2  -2  11   21.68    0.88
   2  -2 -11   25.65    0.61
  -2   2 -11   25.00    0.69
   2   2  11   25.69    0.68
  -2  -2  11   25.44    0.67
  -2   2 -11   26.01    0.66
   2  -2 -11   24.58    0.70
   2   2  11   25.16    0.62
   3  -2  11   18.40    0.48
  -3  -2 -11   17.77    0.53
   3  -2  11   17.67    0.61
   3  -2  11   18.69    0.56
  -3  -2 -11   18.07    0.58
   3  -2 -11   17.10    0.61
   3   2  11   18.15    0.48
  -3   2 -11   17.12    0.58
   3  -2 -11   18.35    0.47
  -3  -2  11   17.55    0.52
   3   2  11   17.32    0.54
  -3   2 -11   18.22    0.53
   3   2  11   18.20    0.53
   4  -2  11   10.29    0.38
  -4  -2 -11   10.36    0.47
   4  -2  11   10.41    0.41
   4   2 -11   10.69    0.33
   4  -2  11   10.53    0.33
   4  -2 -11   10.62    0.32
   4   2  11   10.12    0.38
  -4   2 -11   10.58    0.53
  -4   2 -11   10.68    0.39
   4   2  11   10.46    0.33
   5  -2  11    1.22    0.15
   5   2 -11    1.52    0.14
  -5  -2 -11    1.59    0.23
   5  -2  11    1.35    0.13
   5  -2 -11    1.42    0.13
   5   2  11    1.53    0.16
   5   2  11    1.35    0.12
  -5   2 -11    1.59    0.25
   6  -2  11    4.14    0.20
   6  -2  11    3.98    0.17
  -6   2 -11    3.90    0.23
   6   2  11    4.76    0.20
   0   3 -11    2.29    0.19
   0   3  11    2.32    0.18
   0  -3  11    2.11    0.17
   0  -3 -11    2.25    0.20
   0  -3  11    2.20    0.17
  -1   3  11   10.19    0.35
  -1  -3 -11    9.56    0.33
   1   3 -11    9.89    0.37
  -1  -3 -11    9.82    0.38
   1  -3  11   10.31    0.35
  -1  -3  11   10.11    0.35
   1   3  11   10.01    0.35
  -1   3 -11    9.79    0.36
   1   3  11    9.52    0.31
   1  -3 -11   10.03    0.29
  -1   3 -11    9.91    0.36
   1  -3 -11    8.58    0.41
  -2  -3 -11    1.11    0.19
   2  -3  11    1.10    0.15
   2   3 -11    1.09    0.19
   2  -3  11    1.25    0.22
   2  -3  11    1.05    0.12
   2   3  11    1.29    0.16
  -2   3 -11    1.13    0.19
  -2  -3  11    0.95    0.18
  -2  -3  11    1.14    0.15
   2   3  11    1.06    0.12
   2  -3 -11    1.08    0.11
   2  -3 -11    1.31    0.21
   3  -3  11    1.58    0.18
   3  -3  11    1.82    0.24
  -3  -3 -11    1.42    0.21
   3  -3  11    1.46    0.13
  -3  -3 -11    1.25    0.21
  -3   3 -11    1.25    0.18
  -3  -3  11    1.40    0.19
   3   3  11    1.49    0.18
   3   3  11    1.58    0.18
   3   3  11    1.63    0.14
   3  -3 -11    1.54    0.13
  -3  -3  11    1.14    0.16
   4   3 -11    0.42    0.13
   4  -3  11    0.45    0.17
   4  -3  11    0.36    0.10
  -4  -3 -11    0.31    0.20
   4   3  11    0.56    0.11
   4  -3 -11    0.43    0.11
  -4  -3  11    0.54    0.16
  -4  -3  11    0.49    0.17
   4   3  11    0.37    0.15
  -4   3 -11    0.36    0.25
  -4   3 -11    0.46    0.17
   5   3 -11    1.79    0.14
  -5  -3 -11    1.85    0.22
   5  -3  11    1.75    0.13
   5  -3  11    1.84    0.16
   5   3  11    1.55    0.16
  -5  -3  11    1.75    0.18
   5  -3 -11    1.85    0.14
   5   3  11    1.91    0.13
  -5   3 -11    1.77    0.25
   6  -3  11    0.25    0.08
   6  -3  11    0.40    0.10
  -6   3 -11    0.24    0.16
   6   3  11    0.38    0.10
   0  -4 -11    0.38    0.17
   0   4 -11    0.32    0.14
   0  -4  11    0.41    0.12
   0   4  11    0.47    0.13
   0  -4  11    0.30    0.16
   0  -4  11    0.40    0.12
   0  -4 -11    0.36    0.17
   0  -4 -11    0.37    0.11
  -1  -4 -11    3.75    0.19
   1  -4  11    3.05    0.20
   1  -4  11    3.05    0.24
  -1  -4 -11    3.35    0.23
   1   4 -11    3.30    0.22
  -1   4  11    3.04    0.20
  -1   4 -11    3.52    0.22
  -1   4 -11    3.10    0.21
  -1  -4  11    3.30    0.22
   1  -4 -11    3.34    0.18
   1   4  11    3.14    0.20
  -1  -4  11    2.76    0.18
   2   4 -11    4.77    0.28
   2  -4  11    5.03    0.31
   2  -4  11    5.26    0.27
  -2  -4 -11    4.68    0.28
  -2  -4 -11    4.63    0.28
  -2   4  11    4.61    0.27
   2  -4  11    4.52    0.21
  -2  -4  11    4.77    0.26
   2   4  11    4.40    0.27
  -2   4 -11    5.00    0.27
  -2  -4  11    4.68    0.26
   2  -4 -11    5.11    0.20
   2   4  11    5.25    0.22
  -3  -4 -11   14.09    0.49
  -3  -4 -11   13.70    0.51
   3  -4  11   13.64    0.47
   3  -4  11   13.35    0.52
   3  -4  11   13.17    0.39
   3   4  11   13.26    0.46
  -3  -4  11   13.41    0.44
   3   4  11   13.01    0.39
   3  -4 -11   13.86    0.38
  -3   4 -11   14.18    0.45
  -3  -4  11   13.36    0.45
  -4  -4 -11    0.26    0.20
   4  -4  11    0.10    0.10
   4  -4  11    0.25    0.16
  -4   4 -11    0.33    0.24
  -4   4 -11    0.12    0.16
   4   4  11    0.07    0.10
  -4  -4  11    0.16    0.14
   4  -4 -11    0.29    0.11
   4   4  11    0.19    0.14
  -4  -4  11    0.18    0.15
   5  -4  11    2.57    0.18
   5  -4  11    2.94    0.15
  -5  -4 -11    2.74    0.24
   5   4 -11    3.06    0.17
  -5  -4  11    2.97    0.20
   5  -4 -11    3.09    0.16
   5   4  11    2.91    0.15
   5   4  11    3.14    0.20
  -5   4 -11    2.65    0.26
   6  -4  11    0.76    0.09
  -6   4 -11    0.73    0.16
   6   4  11    0.98    0.11
   0   5  11    2.10    0.18
   0  -5  11    2.22    0.18
   0  -5 -11    2.58    0.24
   0  -5 -11    2.52    0.17
   0  -5  11    2.57    0.20
   0   5 -11    2.60    0.20
   0  -5  11    2.84    0.22
   0  -5 -11    2.58    0.15
   1   5 -11   21.06    0.62
  -1   5  11   22.34    0.61
  -1  -5 -11   21.59    0.56
   1  -5  11   22.47    0.62
   1  -5  11   21.15    0.61
   1  -5  11   21.75    0.64
  -1  -5 -11   20.91    0.63
  -1   5 -11   21.33    0.60
   1   5  11   22.67    0.62
  -1  -5  11   21.02    0.61
  -1   5 -11   21.36    0.61
   1  -5 -11   21.13    0.54
  -1  -5  11   21.40    0.59
   2   5 -11   49.82    1.30
   2  -5  11   52.99    1.32
  -2  -5 -11   52.79    1.30
  -2   5  11   52.91    1.28
   2  -5  11   54.66    1.30
  -2  -5 -11   53.24    1.23
  -2  -5 -11   51.24    1.28
   2  -5  11   52.56    1.22
  -2  -5  11   53.23    1.27
   2  -5 -11   53.14    1.21
  -2  -5  11   52.76    1.27
   2   5  11   52.78    1.23
   2   5  11   53.16    1.29
   3  -5  11    1.55    0.13
   3  -5  11    1.20    0.18
  -3  -5 -11    1.37    0.23
   3  -5  11    1.35    0.23
  -3  -5 -11    1.44    0.21
   3   5  11    1.37    0.19
  -3   5 -11    1.02    0.17
   3  -5 -11    1.42    0.13
  -3  -5  11    1.21    0.16
   3   5  11    1.39    0.13
  -3  -5  11    1.40    0.18
   4  -5  11    1.73    0.20
  -4  -5 -11    1.12    0.22
   4  -5  11    1.33    0.12
   4  -5  11    1.61    0.24
   4  -5 -11    1.51    0.13
  -4   5 -11    1.59    0.26
   4   5  11    1.41    0.17
   4   5  11    1.55    0.13
  -4  -5  11    1.51    0.18
  -4   5 -11    1.61    0.19
  -4  -5  11    1.64    0.18
   5  -5  11    3.28    0.18
  -5  -5 -11    2.86    0.23
   5   5  11    4.00    0.21
  -5   5 -11    3.26    0.27
   5  -5 -11    3.41    0.18
  -5  -5  11    3.85    0.21
   5   5  11    3.43    0.18
  -5  -5  11    3.27    0.20
   0   6 -11    3.43    0.24
   0  -6  11    2.86    0.23
   0  -6 -11    3.29    0.17
   0   6  11    3.39    0.23
   0  -6  11    3.19    0.20
   0  -6 -11    3.34    0.18
   0  -6  11    3.84    0.23
  -1  -6 -11   11.12    0.35
   1  -6  11   11.03    0.41
  -1  -6 -11   10.44    0.51
   1  -6  11   11.06    0.45
  -1  -6 -11   11.36    0.36
   1   6 -11   10.94    0.43
  -1  -6 -11   11.77    0.46
   1  -6  11   11.24    0.41
  -1   6  11   11.68    0.41
  -1   6 -11   11.54    0.42
   1  -6 -11   11.33    0.37
  -1   6 -11   11.17    0.42
  -1  -6  11   11.59    0.41
  -1  -6  11   11.50    0.39
   1  -6 -11   11.66    0.34
   1   6  11   11.71    0.41
   2  -6  11    1.19    0.12
   2  -6  11    1.02    0.17
  -2  -6 -11    1.25    0.21
  -2  -6 -11    1.33    0.14
  -2   6  11    1.04    0.17
  -2  -6 -11    1.32    0.21
   2  -6  11    1.26    0.21
   2   6  11    1.06    0.17
   2   6  11    1.12    0.12
  -2  -6  11    0.88    0.14
  -2  -6  11    1.11    0.17
   2  -6 -11    1.04    0.13
   3  -6  11    9.67    0.31
   3  -6  11    9.73    0.45
   3  -6  11    9.06    0.38
  -3  -6 -11    8.82    0.40
  -3  -6 -11    9.79    0.44
  -3   6 -11    9.08    0.37
   3   6  11    9.61    0.31
   3   6  11    9.34    0.39
  -3  -6  11   10.00    0.36
  -3  -6  11    9.41    0.37
   3  -6 -11    9.61    0.31
  -4  -6 -11    1.38    0.20
   4  -6  11    1.23    0.21
   4  -6  11    1.35    0.12
   4  -6  11    1.09    0.18
  -4  -6 -11    0.98    0.21
   4   6  11    1.16    0.17
  -4   6 -11    1.30    0.25
  -4  -6  11    1.24    0.16
   4   6  11    1.20    0.12
   4  -6 -11    0.96    0.12
  -4   6 -11    1.21    0.17
  -4  -6  11    1.15    0.16
  -5  -6 -11    1.72    0.19
   5  -6  11    1.68    0.12
  -5  -6  11    1.72    0.16
  -5  -6  11    1.78    0.16
   5   6  11    1.76    0.15
  -5   6 -11    2.28    0.23
   5  -6 -11    1.76    0.13
   0  -7  11    2.24    0.21
   0  -7 -11    2.45    0.17
   0  -7 -11    2.05    0.15
   0  -7  11    2.32    0.19
   0   7  11    1.93    0.19
   0   7 -11    2.15    0.22
  -1  -7 -11   10.14    0.33
  -1  -7 -11   10.13    0.46
   1  -7  11    9.76    0.38
   1  -7  11    9.31    0.41
  -1  -7 -11    9.51    0.42
  -1   7  11    9.83    0.39
  -1  -7 -11    9.87    0.33
   1  -7 -11    9.48    0.33
  -1  -7  11    9.36    0.35
  -1  -7  11   10.20    0.38
   1  -7 -11    9.58    0.31
   1   7  11    9.75    0.38
  -2  -7 -11    9.82    0.45
   2  -7  11    9.93    0.32
  -2  -7 -11   10.07    0.34
  -2   7  11   10.04    0.40
  -2  -7 -11    9.90    0.42
   2  -7  11   10.41    0.45
   2  -7  11   10.51    0.40
   2   7  11    9.70    0.39
   2   7  11   10.24    0.33
   2  -7 -11   10.50    0.32
  -2  -7  11    9.83    0.39
  -2  -7  11   11.23    0.38
  -3  -7 -11    4.39    0.30
   3  -7  11    4.49    0.21
   3  -7  11    3.90    0.29
  -3  -7 -11    4.87    0.28
   3  -7  11    4.41    0.29
  -3  -7  11    4.46    0.24
  -3  -7  11    4.88    0.26
   3  -7 -11    4.35    0.22
  -3   7 -11    4.47    0.24
   3   7  11    4.67    0.22
  -4  -7 -11    0.67    0.19
  -4  -7 -11    0.75    0.18
   4  -7  11    0.77    0.10
   4  -7  11    0.83    0.17
   4  -7  11    0.65    0.19
   4   7  11    0.85    0.11
  -4   7 -11    0.49    0.21
   4  -7 -11    0.74    0.12
  -4  -7  11    0.82    0.16
  -4  -7  11    0.83    0.14
  -4   7 -11    0.60    0.16
   4   7  11    0.71    0.15
   5  -7  11    3.81    0.16
  -5  -7 -11    3.69    0.22
  -5   7 -11    3.27    0.25
  -5  -7  11    3.93    0.19
  -5  -7  11    4.03    0.22
   5   7  11    3.68    0.21
   0   8  11    9.87    0.39
   0  -8  11    9.80    0.40
   0  -8 -11    9.39    0.41
   0  -8 -11    9.81    0.32
   0  -8  11   10.01    0.37
   0  -8 -11    9.10    0.32
  -1  -8 -11   30.73    0.77
  -1  -8 -11   29.83    0.82
  -1   8  11   30.84    0.84
   1  -8  11   31.59    0.84
  -1  -8 -11   32.03    0.77
  -1  -8 -11   30.71    0.88
   1  -8  11   31.24    0.85
   1  -8 -11   31.57    0.76
   1  -8 -11   30.46    0.76
   1   8  11   31.53    0.83
  -1  -8  11   30.79    0.80
  -1  -8  11   30.97    0.83
  -2  -8 -11    1.87    0.16
  -2  -8 -11    1.83    0.25
   2  -8  11    2.25    0.20
  -2  -8 -11    2.14    0.22
  -2   8  11    1.82    0.20
   2  -8  11    2.32    0.15
   2  -8  11    2.26    0.24
   2   8  11    2.29    0.21
   2  -8 -11    2.02    0.15
  -2  -8  11    2.31    0.18
   2   8  11    2.00    0.15
  -2  -8  11    2.08    0.20
   3  -8  11    4.91    0.21
  -3  -8 -11    4.33    0.26
   3  -8  11    4.43    0.30
   3  -8  11    4.52    0.28
  -3  -8 -11    4.90    0.31
  -3  -8  11    4.29    0.25
  -3   8 -11    4.21    0.23
   3  -8 -11    4.26    0.22
  -3  -8  11    4.71    0.24
   3   8  11    4.50    0.21
  -4  -8 -11    2.37    0.20
  -4  -8 -11    2.23    0.22
   4  -8  11    2.32    0.13
   4  -8  11    1.76    0.19
   4  -8  11    2.23    0.23
  -4   8 -11    2.60    0.25
   4   8  11    2.34    0.18
   4   8  11    2.40    0.14
  -4  -8  11    1.97    0.17
  -4  -8  11    2.49    0.19
   4  -8 -11    2.51    0.15
  -4   8 -11    2.23    0.18
  -5  -8 -11    0.98    0.15
   5  -8  11    1.07    0.09
   5   8  11    1.22    0.13
  -5  -8  11    0.97    0.13
  -5   8 -11    0.96    0.18
  -5  -8  11    0.93    0.13
   0  -9  11   26.57    0.74
   0  -9 -11   26.56    0.66
   0   9  11   25.52    0.73
   0  -9 -11   26.28    0.66
   0  -9 -11   25.66    0.72
  -1  -9 -11    5.47    0.29
   1  -9  11    6.28    0.36
  -1   9  11    5.83    0.32
  -1  -9 -11    5.75    0.26
   1  -9  11    5.85    0.32
   1  -9 -11    5.56    0.25
   1  -9 -11    5.56    0.25
   1   9  11    5.73    0.31
  -1  -9  11    5.27    0.29
  -1  -9  11    5.92    0.32
  -2  -9 -11    7.32    0.28
   2  -9  11    7.25    0.40
   2  -9  11    6.55    0.25
   2  -9  11    7.03    0.34
  -2   9  11    7.03    0.34
  -2  -9 -11    6.79    0.36
  -2  -9 -11    6.41    0.35
  -2  -9  11    6.97    0.33
  -2  -9  11    6.58    0.31
   2  -9 -11    6.34    0.28
   2   9  11    7.25    0.26
   2  -9 -11    6.79    0.27
   2   9  11    7.09    0.34
   3  -9  11    0.86    0.11
   3  -9  11    0.93    0.17
  -3  -9 -11    0.83    0.18
   3  -9  11    0.95    0.20
  -3  -9 -11    1.00    0.21
  -3  -9  11    0.67    0.15
   3  -9 -11    0.85    0.13
  -3  -9  11    1.28    0.15
   3   9  11    0.81    0.11
  -3   9 -11    0.85    0.15
  -4  -9 -11    7.94    0.34
   4  -9  11    8.26    0.25
  -4  -9 -11    8.27    0.32
   4  -9  11    7.72    0.34
  -4   9 -11    7.89    0.39
   4   9  11    8.53    0.31
  -4  -9  11    8.43    0.30
   4   9  11    8.45    0.26
   4  -9 -11    7.87    0.26
  -4  -9  11    8.00    0.31
   0 -10 -11    4.45    0.23
   0  10  11    3.61    0.25
   0 -10 -11    4.34    0.22
   0 -10 -11    4.11    0.25
   0 -10  11    4.14    0.26
  -1 -10 -11    2.33    0.22
   1 -10  11    2.72    0.22
  -1 -10 -11    2.19    0.16
  -1  10  11    2.77    0.22
   1 -10  11    2.31    0.22
   1 -10 -11    2.35    0.17
  -1 -10  11    2.23    0.20
  -1 -10  11    2.50    0.19
   1 -10 -11    2.20    0.22
   1  10  11    2.71    0.22
   1 -10 -11    2.28    0.16
   2 -10  11    0.43    0.18
   2 -10  11    0.49    0.15
   2 -10  11    0.52    0.11
  -2 -10 -11    0.60    0.12
  -2  10  11    0.47    0.16
  -2 -10 -11    0.70    0.18
  -2 -10 -11    0.68    0.23
   2  10  11    0.46    0.11
   2 -10 -11    0.58    0.13
  -2 -10  11    0.47    0.13
   2 -10 -11    0.66    0.13
   2  10  11    0.49    0.17
  -2 -10  11    0.33    0.15
  -2  10 -11    0.75    0.15
  -3 -10 -11    2.92    0.22
   3 -10  11    2.95    0.24
   3 -10  11    2.75    0.21
  -3 -10 -11    3.26    0.25
   3 -10  11    3.02    0.15
   3 -10 -11    2.79    0.16
  -3 -10  11    3.32    0.21
  -3 -10  11    3.58    0.20
   3  10  11    2.72    0.15
  -4 -10 -11    2.09    0.19
   4 -10  11    2.17    0.11
  -4 -10 -11    1.93    0.17
   4  10  11    1.89    0.15
  -4 -10  11    2.18    0.16
  -4 -10  11    2.17    0.15
   4  10  11    1.78    0.16
  -4  10 -11    1.71    0.20
   0  11  11    1.50    0.18
   0 -11  11    1.23    0.18
   0 -11 -11    1.51    0.19
   0 -11 -11    1.56    0.14
   0 -11 -11    1.45    0.16
  -1 -11 -11    1.48    0.19
   1 -11  11    1.30    0.19
  -1  11  11    1.16    0.18
  -1 -11 -11    1.56    0.14
   1 -11  11    1.70    0.20
  -1 -11  11    1.46    0.18
   1 -11 -11    1.40    0.14
   1 -11 -11    1.31    0.19
   1  11  11    1.30    0.18
   1 -11 -11    1.48    0.15
   2 -11  11    4.02    0.24
  -2 -11 -11    3.92    0.20
  -2 -11 -11    3.82    0.23
   2 -11  11    3.90    0.26
  -2  11  11    3.74    0.24
   2 -11 -11    3.81    0.18
   2  11  11    3.98    0.19
  -2 -11  11    3.98    0.21
  -2 -11  11    3.92    0.23
   2 -11 -11    3.95    0.20
  -3 -11 -11    0.21    0.14
   3 -11  11    0.35    0.09
   3 -11  11    0.42    0.16
   3 -11  11    0.32    0.15
  -3 -11 -11    0.42    0.19
  -3 -11  11    0.23    0.11
   3  11  11    0.31    0.09
  -3 -11  11    0.31    0.13
   3 -11 -11    0.43    0.12
   4 -11  11    1.33    0.09
  -4  11 -11    1.71    0.18
  -4 -11  11    1.44    0.13
   4  11  11    1.61    0.13
  -4 -11  11    1.31    0.12
   0 -12 -11    0.58    0.17
   0  12  11    0.49    0.16
   0 -12 -11    0.53    0.11
   0 -12  11    0.41    0.15
   1 -12  11   12.45    0.45
  -1 -12 -11   13.28    0.37
  -1  12  11   12.86    0.43
  -1 -12 -11   12.79    0.42
   1 -12 -11   13.15    0.38
   1 -12 -11   12.88    0.42
   1  12  11   12.25    0.43
  -1 -12  11   12.97    0.43
   1 -12 -11   13.06    0.36
  -2 -12 -11    2.55    0.19
   2 -12  11    2.51    0.21
  -2 -12 -11    2.66    0.14
  -2  12  11    2.33    0.20
   2  12  11    2.59    0.14
  -2 -12  11    2.50    0.19
  -2 -12  11    2.63    0.17
   2 -12 -11    2.59    0.15
   2 -12 -11    2.49    0.16
   3 -12  11    3.24    0.15
  -3 -12 -11    2.52    0.17
   3 -12  11    3.00    0.20
   3  12  11    2.99    0.15
  -3 -12  11    3.13    0.17
  -3 -12  11    3.12    0.18
  -3  12 -11    3.46    0.23
   0 -13 -11    0.32    0.10
   0 -13  11    0.27    0.14
   0 -13 -11    0.31    0.14
  -1 -13 -11    4.26    0.18
   1 -13  11    3.88    0.23
  -1 -13 -11    3.82    0.21
   1 -13 -11    4.01    0.19
  -1 -13  11    4.07    0.22
   1 -13 -11    3.71    0.21
   2 -13  11    1.63    0.17
  -2 -13 -11    1.82    0.16
   2 -13 -11    2.02    0.12
  -2 -13  11    2.05    0.17
   2  13  11    1.86    0.11
   0 -14  11    3.20    0.19
   0 -14 -11    2.60    0.17
   0 -14 -11    2.94    0.15
   1 -14  11    2.93    0.19
  -1 -14 -11    3.08    0.15
  -1 -14 -11    2.59    0.17
   1 -14 -11    2.79    0.15
   1 -14 -11    2.57    0.24
  -1 -14  11    3.26    0.19
   1  14  11    2.85    0.14
   0   0  12   73.70    1.73
   0   0 -12   73.93    1.71
  -1   0  12    5.94    0.29
   1   0  12    5.69    0.23
   1   0  12    5.95    0.28
   1   0 -12    5.91    0.30
  -1   0  12    6.26    0.29
  -1   0 -12    5.81    0.29
   1   0 -12    5.89    0.29
   2   0  12    0.52    0.14
  -2   0  12    0.52    0.15
  -2   0 -12    0.71    0.17
  -2   0 -12    0.26    0.16
   2   0 -12    0.57    0.21
   2   0  12    0.49    0.10
  -3   0 -12    1.85    0.20
   3   0  12    1.85    0.19
  -3   0 -12    1.64    0.22
   3   0  12    2.00    0.14
   3   0 -12    2.05    0.14
   4   0  12   35.77    0.92
   4   0 -12   35.58    0.84
  -4   0 -12   34.53    0.94
   4   0  12   36.56    0.85
   4   0  12   33.06    0.88
   5   0  12    0.80    0.10
   5   0 -12    0.67    0.12
   5   0  12    0.59    0.14
   0   1  12   33.85    0.85
   0   1 -12   33.62    0.84
   0  -1  12   34.28    0.86
   0  -1 -12   32.92    0.85
   1  -1  12   14.22    0.40
  -1   1  12   15.16    0.45
   1  -1  12   14.59    0.45
   1   1 -12   15.34    0.49
  -1  -1 -12   13.94    0.47
   1   1  12   14.69    0.40
  -1   1 -12   14.15    0.46
   1  -1 -12   14.49    0.46
   1   1  12   15.26    0.46
  -1  -1  12   14.14    0.45
   2   1 -12    6.60    0.38
  -2  -1 -12    6.80    0.33
  -2  -1 -12    6.89    0.35
   2  -1  12    6.98    0.24
   2  -1  12    6.71    0.31
  -2   1  12    6.66    0.33
  -2   1 -12    6.43    0.33
  -2  -1  12    6.92    0.32
   2  -1 -12    6.45    0.33
  -2   1 -12    6.79    0.31
   2   1  12    7.10    0.31
   2   1  12    6.69    0.25
   2  -1 -12    6.11    0.34
  -3  -1 -12   19.63    0.62
   3  -1  12   20.54    0.60
   3  -1  12   20.64    0.53
  -3  -1 -12   19.40    0.59
  -3   1 -12   20.56    0.58
   3   1  12   20.26    0.53
  -3  -1  12   19.56    0.58
   3  -1 -12   20.05    0.51
  -3   1 -12   20.79    0.62
   3   1  12   19.74    0.60
   4  -1  12    5.65    0.32
  -4  -1 -12    6.45    0.33
   4   1 -12    5.93    0.24
   4  -1  12    6.29    0.24
   4  -1 -12    5.94    0.24
   4   1  12    5.52    0.33
   4   1  12    5.78    0.24
   4   1  12    5.18    0.29
   5  -1  12    1.14    0.15
   5   1 -12    1.07    0.12
   5  -1  12    1.09    0.11
   5   1  12    0.92    0.14
   5   1  12    1.13    0.11
   5  -1 -12    1.08    0.12
   0  -2 -12    1.69    0.19
   0   2 -12    1.95    0.18
   0  -2  12    1.92    0.17
   0  -2  12    1.91    0.17
   0   2 -12    1.61    0.19
   0   2  12    1.70    0.16
   1  -2  12    7.65    0.32
  -1   2  12    7.64    0.32
   1   2 -12    8.00    0.37
  -1  -2 -12    7.39    0.34
   1  -2  12    7.15    0.29
  -1   2 -12    7.52    0.33
   1   2  12    7.93    0.32
   1   2  12    7.43    0.26
   1  -2 -12    7.18    0.34
  -1  -2  12    8.31    0.32
  -2  -2 -12   42.44    1.05
  -2  -2 -12   40.46    1.02
   2   2 -12   41.59    1.07
   2  -2  12   40.80    1.04
   2  -2  12   40.36    0.97
   2   2  12   41.45    0.98
   2  -2 -12   41.29    0.96
  -2  -2  12   42.00    1.03
   2  -2 -12   39.11    1.07
  -2   2 -12   41.00    1.00
  -2   2 -12   42.31    1.04
   2   2  12   43.17    1.05
   3  -2  12   12.01    0.52
  -3  -2 -12   11.91    0.46
   3  -2  12   11.37    0.43
   3  -2  12   11.83    0.35
  -3   2 -12   12.35    0.65
  -3   2 -12   11.46    0.47
  -3   2 -12   11.67    0.41
   3   2  12   11.91    0.36
   3  -2 -12   11.63    0.34
  -3  -2  12   11.72    0.41
   3   2  12   11.21    0.42
  -4  -2 -12   10.17    0.45
   4  -2  12   10.29    0.40
   4  -2  12   10.47    0.32
   4   2  12    9.66    0.32
  -4   2 -12    9.60    0.52
   4  -2 -12   10.35    0.32
  -4   2 -12    9.95    0.39
   4   2  12    9.89    0.37
   5   2 -12   12.73    0.36
   5  -2  12   13.22    0.36
   5  -2  12   12.44    0.39
  -5  -2 -12   13.19    0.47
   5   2  12   13.24    0.40
   5   2  12   12.46    0.35
   5  -2 -12   13.23    0.36
  -5   2 -12   12.92    0.51
   0  -3 -12    2.96    0.22
   0   3 -12    2.58    0.22
   0  -3 -12    3.15    0.19
   0  -3  12    2.74    0.19
   0   3 -12    2.95    0.20
   0   3  12    2.93    0.16
   0  -3  12    2.81    0.20
   0   3  12    2.86    0.21
   1  -3  12   12.02    0.40
   1  -3  12   11.26    0.46
  -1  -3 -12   11.50    0.42
   1   3 -12   11.06    0.43
  -1   3  12   11.86    0.40
   1   3  12   11.93    0.40
  -1   3 -12   11.27    0.40
   1  -3 -12   11.51    0.42
  -1  -3  12   11.97    0.39
   1   3  12   11.14    0.34
   2   3 -12    7.65    0.41
   2  -3  12    8.40    0.35
   2  -3  12    8.65    0.44
  -2  -3 -12    9.31    0.40
   2  -3  12    8.40    0.28
  -2   3 -12    8.31    0.34
   2   3  12    8.27    0.35
  -2   3 -12    9.09    0.38
   2   3  12    8.40    0.29
   2  -3 -12    8.52    0.27
  -2  -3  12    8.55    0.34
   3  -3  12    7.01    0.34
   3  -3  12    6.82    0.25
  -3  -3 -12    6.64    0.39
   3  -3  12    6.90    0.37
  -3  -3  12    6.99    0.37
  -3   3 -12    6.93    0.33
   3  -3 -12    6.94    0.26
   3   3  12    6.35    0.33
  -3  -3  12    6.83    0.32
   3   3  12    6.11    0.32
   3   3  12    6.89    0.26
  -4  -3 -12    3.67    0.27
   4  -3  12    3.82    0.21
   4  -3  12    3.77    0.25
  -4   3 -12    3.86    0.23
   4   3  12    3.75    0.22
  -4  -3  12    3.73    0.23
   4  -3 -12    3.74    0.20
   4   3  12    3.91    0.20
  -4  -3  12    3.70    0.23
  -4   3 -12    3.57    0.32
  -5  -3 -12    4.75    0.27
   5  -3  12    4.89    0.19
   5   3  12    4.75    0.24
  -5   3 -12    4.42    0.29
   5  -3 -12    4.52    0.21
   5   3  12    5.10    0.20
   0  -4 -12    2.41    0.22
   0   4  12    2.58    0.20
   0  -4  12    2.37    0.22
   0  -4 -12    2.82    0.18
   0  -4  12    2.57    0.19
   0   4 -12    2.42    0.22
   0  -4  12    3.11    0.21
  -1  -4 -12   16.24    0.45
   1  -4  12   16.33    0.50
  -1   4  12   16.23    0.50
  -1  -4 -12   15.52    0.52
   1   4 -12   16.72    0.53
   1  -4  12   16.27    0.55
   1   4  12   15.43    0.44
  -1  -4  12   16.08    0.49
   1   4  12   16.98    0.51
   1  -4 -12   16.30    0.43
  -1  -4  12   15.56    0.51
  -1   4 -12   16.30    0.50
   2  -4  12   38.23    1.01
   2  -4  12   38.63    0.98
  -2  -4 -12   38.29    0.99
   2  -4  12   37.25    0.90
  -2  -4  12   37.39    0.96
  -2  -4  12   38.40    0.96
  -2   4 -12   37.95    0.97
   2  -4 -12   38.49    0.90
   2   4  12   37.70    0.98
   2   4  12   38.64    0.91
  -3  -4 -12   12.33    0.47
   3  -4  12   12.67    0.37
   3  -4  12   12.55    0.52
   3  -4  12   12.44    0.45
  -3  -4 -12   12.63    0.50
   3  -4 -12   11.99    0.36
  -3   4 -12   13.26    0.43
  -3  -4  12   12.50    0.44
   3   4  12   12.71    0.44
   3   4  12   12.62    0.43
   3   4  12   12.08    0.37
  -3  -4  12   13.20    0.44
   4  -4  12    2.08    0.15
  -4  -4 -12    2.07    0.24
   4  -4  12    2.58    0.22
  -4  -4  12    2.44    0.20
  -4   4 -12    2.18    0.20
   4   4  12    2.14    0.18
  -4   4 -12    2.04    0.28
  -4  -4  12    2.47    0.20
   4   4  12    2.29    0.15
   4  -4 -12    2.13    0.15
  -5  -4 -12    0.72    0.18
   5  -4  12    0.74    0.09
  -5   4 -12    0.70    0.21
   5   4  12    0.66    0.10
  -5  -4  12    0.92    0.15
   5   4  12    0.80    0.13
   5  -4 -12    0.68    0.11
   0  -5  12    6.15    0.33
   0  -5 -12    6.47    0.32
   0   5 -12    6.29    0.32
   0  -5  12    6.43    0.32
   0  -5 -12    6.11    0.26
   0  -5 -12    5.90    0.27
   0  -5  12    5.69    0.29
   0   5  12    6.50    0.31
  -1   5  12    3.55    0.23
  -1  -5 -12    3.49    0.19
   1   5 -12    3.62    0.26
   1  -5  12    3.43    0.23
  -1  -5 -12    3.31    0.25
   1  -5  12    3.47    0.26
   1  -5 -12    3.51    0.17
   1   5  12    2.98    0.17
  -1  -5  12    3.42    0.24
  -1   5 -12    3.22    0.26
   1   5  12    2.90    0.22
  -1   5 -12    3.28    0.22
  -1  -5  12    2.98    0.20
  -2  -5 -12   13.65    0.52
   2  -5  12   14.73    0.41
   2  -5  12   14.30    0.53
  -2  -5 -12   14.40    0.52
  -2   5  12   13.87    0.47
   2  -5  12   14.63    0.48
  -2  -5  12   14.79    0.46
   2  -5 -12   14.79    0.40
  -2  -5  12   14.66    0.47
   2   5  12   14.98    0.41
   2   5  12   14.71    0.48
   3  -5  12   12.56    0.46
   3  -5  12   12.57    0.52
  -3  -5 -12   13.31    0.51
   3  -5  12   12.91    0.38
  -3  -5 -12   13.20    0.48
  -3   5 -12   12.58    0.44
   3   5  12   13.37    0.38
   3  -5 -12   12.45    0.37
   3   5  12   12.24    0.44
   3   5  12   12.81    0.45
  -3  -5  12   12.69    0.44
  -3  -5  12   13.46    0.43
   4  -5  12   10.54    0.31
  -4  -5 -12   11.19    0.45
   4  -5  12   10.07    0.40
   4  -5 -12   10.48    0.32
  -4   5 -12   10.51    0.38
   4   5  12   10.33    0.31
   4   5  12   10.54    0.37
  -4  -5  12    9.85    0.38
  -4   5 -12   10.25    0.49
  -4  -5  12   10.46    0.39
  -5  -5 -12    2.82    0.21
   5  -5  12    3.12    0.15
   5   5  12    2.90    0.14
   5   5  12    2.95    0.17
  -5   5 -12    2.74    0.24
  -5  -5  12    3.05    0.18
   0  -6 -12    0.85    0.14
   0  -6  12    0.73    0.17
   0  -6 -12    0.84    0.14
   0  -6  12    0.90    0.17
   0  -6  12    0.81    0.15
   0   6  12    0.91    0.16
   1  -6  12   13.57    0.51
  -1  -6 -12   14.00    0.51
  -1  -6 -12   14.45    0.42
   1  -6  12   15.00    0.48
  -1   6  12   14.02    0.47
   1   6  12   14.86    0.48
  -1  -6  12   13.83    0.48
  -1   6 -12   13.59    0.47
   1  -6 -12   14.93    0.40
  -1  -6  12   14.29    0.46
   2  -6  12    2.77    0.22
  -2  -6 -12    2.88    0.25
  -2  -6 -12    2.30    0.25
  -2   6  12    2.37    0.21
   2  -6  12    2.92    0.16
   2  -6  12    2.59    0.25
  -2  -6  12    2.35    0.19
  -2  -6  12    2.49    0.21
   2   6  12    2.30    0.21
   2   6  12    2.69    0.16
   2  -6 -12    2.71    0.16
   3  -6  12    0.87    0.11
   3  -6  12    0.95    0.21
   3  -6  12    0.65    0.16
  -3  -6 -12    0.93    0.22
  -3  -6 -12    0.89    0.20
  -3   6 -12    0.79    0.16
  -3  -6  12    0.68    0.16
   3   6  12    0.66    0.18
   3  -6 -12    0.76    0.12
  -3  -6  12    0.91    0.15
   3   6  12    0.91    0.12
  -4  -6 -12    0.32    0.18
   4  -6  12    0.34    0.09
   4  -6  12    0.39    0.16
  -4   6 -12    0.17    0.21
   4   6  12    0.17    0.13
  -4  -6  12    0.27    0.14
   4  -6 -12    0.28    0.11
   4   6  12    0.25    0.10
  -4   6 -12    0.27    0.15
  -4  -6  12    0.23    0.14
  -5  -6 -12    0.40    0.15
   5  -6  12    0.50    0.08
  -5   6 -12    0.34    0.18
  -5  -6  12    0.30    0.13
   5   6  12    0.35    0.09
  -5  -6  12    0.40    0.12
   5   6  12    0.29    0.11
   0   7  12    6.57    0.33
   0  -7 -12    7.13    0.28
   0  -7  12    6.35    0.31
   0  -7  12    6.46    0.34
   0  -7 -12    6.90    0.28
  -1   7  12    0.70    0.16
  -1  -7 -12    0.78    0.15
  -1  -7 -12    0.59    0.13
  -1  -7 -12    0.57    0.22
   1  -7  12    0.84    0.19
   1  -7  12    0.60    0.16
   1   7  12    0.70    0.16
   1  -7 -12    0.81    0.15
  -1  -7  12    0.66    0.16
  -1  -7  12    0.66    0.14
   1  -7 -12    0.61    0.13
  -2  -7 -12   11.20    0.47
  -2  -7 -12   11.72    0.36
  -2   7  12    9.51    0.40
   2  -7  12   10.77    0.33
   2  -7  12   10.26    0.40
  -2  -7 -12   10.49    0.43
   2  -7  12   10.43    0.46
  -2  -7  12   11.18    0.41
  -2  -7  12   10.63    0.39
   2   7  12   11.42    0.34
   2   7  12   10.11    0.40
   2  -7 -12   10.46    0.33
  -3  -7 -12    3.57    0.25
  -3  -7 -12    3.90    0.28
   3  -7  12    3.04    0.27
   3  -7  12    3.57    0.19
   3  -7  12    3.54    0.24
   3  -7 -12    3.56    0.18
  -3  -7  12    3.67    0.22
  -3  -7  12    3.76    0.23
  -3   7 -12    3.42    0.21
   3   7  12    3.32    0.17
   4  -7  12    0.54    0.16
  -4  -7 -12    0.42    0.18
   4  -7  12    0.57    0.09
  -4   7 -12    0.55    0.15
   4   7  12    0.49    0.13
  -4  -7  12    0.35    0.13
   4   7  12    0.38    0.10
   4  -7 -12    0.51    0.11
  -4   7 -12    0.60    0.21
  -4  -7  12    0.62    0.15
   5  -7  12    0.98    0.09
  -5  -7 -12    0.78    0.15
  -5  -7  12    1.00    0.14
   5   7  12    1.01    0.12
  -5   7 -12    1.00    0.18
  -5  -7  12    0.97    0.13
   0  -8 -12   29.12    0.72
   0  -8  12   29.10    0.80
   0   8  12   28.72    0.79
   0  -8  12   29.27    0.77
   0  -8 -12   29.35    0.73
   1  -8  12   10.07    0.40
  -1  -8 -12    9.31    0.43
   1  -8  12   10.48    0.44
  -1  -8 -12   10.45    0.34
  -1   8  12   10.62    0.40
  -1  -8 -12   10.31    0.49
  -1  -8  12   10.81    0.41
   1  -8 -12   10.00    0.34
   1  -8 -12   10.33    0.33
   1   8  12   10.85    0.40
  -1  -8  12   10.50    0.38
   2  -8  12    4.61    0.29
   2  -8  12    4.86    0.29
   2  -8  12    4.94    0.22
  -2   8  12    4.71    0.30
  -2  -8 -12    4.65    0.28
  -2  -8 -12    4.88    0.24
  -2  -8 -12    4.84    0.31
   2   8  12    5.09    0.23
   2  -8 -12    5.02    0.23
  -2  -8  12    4.72    0.28
   2   8  12    4.69    0.29
  -2  -8  12    4.92    0.30
   3  -8  12    1.20    0.21
   3  -8  12    1.87    0.13
  -3  -8 -12    1.53    0.23
  -3  -8 -12    1.49    0.19
   3  -8  12    1.55    0.18
  -3  -8  12    1.32    0.17
  -3  -8  12    1.35    0.16
  -3   8 -12    1.05    0.16
   3  -8 -12    1.39    0.14
   3   8  12    1.39    0.12
  -4  -8 -12    0.52    0.17
   4  -8  12    0.49    0.15
   4  -8  12    0.43    0.09
  -4  -8  12    0.52    0.13
   4   8  12    0.47    0.13
  -4   8 -12    0.62    0.19
  -4  -8  12    0.43    0.12
   4  -8 -12    0.44    0.11
   4   8  12    0.32    0.09
   0   9  12    3.46    0.24
   0   9 -12    3.94    0.24
   0  -9 -12    3.66    0.20
   0  -9 -12    3.65    0.19
   0  -9  12    2.92    0.21
   0  -9  12    3.49    0.25
  -1   9  12    1.72    0.20
  -1  -9 -12    1.75    0.21
   1  -9  12    1.90    0.22
  -1  -9 -12    2.06    0.16
   1  -9  12    1.97    0.20
   1   9  12    1.80    0.20
  -1  -9  12    2.24    0.18
   1  -9 -12    2.17    0.16
   1  -9 -12    1.78    0.16
  -1  -9  12    1.74    0.19
  -2  -9 -12    7.81    0.36
   2  -9  12    7.61    0.40
  -2   9  12    7.22    0.34
  -2  -9 -12    7.75    0.43
  -2  -9 -12    8.43    0.29
   2  -9  12    7.83    0.35
   2   9  12    8.85    0.28
   2   9  12    8.43    0.35
   2  -9 -12    8.01    0.29
  -2   9 -12    7.54    0.31
  -2  -9  12    7.96    0.35
  -2  -9  12    8.31    0.33
   3  -9  12    1.56    0.12
   3  -9  12    1.52    0.21
  -3  -9 -12    1.25    0.18
   3  -9  12    1.38    0.18
  -3  -9 -12    1.39    0.21
   3   9  12    1.46    0.12
  -3  -9  12    1.32    0.15
   3  -9 -12    1.30    0.13
  -3  -9  12    1.21    0.16
  -3   9 -12    1.34    0.15
  -4  -9 -12    1.27    0.17
   4  -9  12    1.33    0.10
  -4   9 -12    1.56    0.20
   4   9  12    1.32    0.14
  -4  -9  12    1.43    0.15
   4   9  12    1.45    0.10
  -4  -9  12    1.24    0.14
   0  10  12    1.20    0.17
   0 -10 -12    1.39    0.14
   0 -10  12    1.64    0.20
   0 -10 -12    1.43    0.20
   0 -10 -12    1.32    0.15
   1 -10  12    0.75    0.18
  -1  10  12    0.72    0.17
   1 -10  12    0.93    0.17
  -1 -10 -12    0.71    0.18
  -1 -10 -12    0.77    0.12
  -1 -10  12    0.74    0.16
  -1 -10  12    0.78    0.15
   1 -10 -12    0.96    0.14
   1 -10 -12    0.63    0.13
   1  10  12    0.80    0.16
  -2 -10 -12    1.55    0.19
  -2 -10 -12    0.95    0.23
   2 -10  12    1.40    0.20
  -2 -10 -12    1.20    0.13
   2 -10  12    1.13    0.17
  -2  10  12    1.18    0.18
   2  10  12    1.29    0.12
   2 -10 -12    1.11    0.14
  -2  10 -12    1.10    0.14
  -2 -10  12    1.24    0.17
   2  10  12    1.13    0.18
  -2 -10  12    1.06    0.15
  -3 -10 -12    0.46    0.15
   3 -10  12    0.23    0.14
  -3 -10 -12    0.20    0.17
   3 -10  12    0.42    0.09
   3 -10  12    0.45    0.17
   3  10  12    0.30    0.09
  -3 -10  12    0.23    0.13
   3 -10 -12    0.23    0.11
  -3 -10  12    0.43    0.12
  -4 -10 -12    5.04    0.26
   4 -10  12    5.61    0.18
  -4 -10  12    5.97    0.23
  -4  10 -12    5.59    0.30
  -4 -10  12    5.53    0.23
   4  10  12    5.64    0.22
   0 -11 -12    8.68    0.28
   0 -11 -12    8.25    0.35
   0 -11  12    8.58    0.36
   0  11  12    8.07    0.34
   0 -11 -12    7.98    0.30
   1 -11  12    0.06    0.15
  -1 -11 -12    0.02    0.10
  -1  11  12    0.14    0.14
  -1 -11 -12    0.05    0.16
   1 -11 -12   -0.05    0.11
  -1 -11  12    0.00    0.13
   1  11  12    0.05    0.15
   1 -11 -12    0.08    0.12
   2 -11  12    1.28    0.19
  -2 -11 -12    1.17    0.17
   2 -11  12    1.16    0.17
  -2  11  12    1.16    0.17
   2  11  12    1.08    0.10
  -2 -11  12    1.47    0.15
   2 -11 -12    0.93    0.13
  -2  11 -12    1.09    0.14
  -2 -11  12    1.11    0.16
   2 -11 -12    1.07    0.13
   3 -11  12    3.37    0.16
  -3 -11 -12    3.28    0.22
  -3 -11 -12    3.50    0.19
   3 -11  12    3.63    0.22
   3  11  12    3.53    0.16
  -3  11 -12    3.28    0.24
  -3 -11  12    3.33    0.18
  -3 -11  12    3.82    0.20
   0 -12 -12    0.11    0.10
   0  12  12    0.05    0.14
   0 -12 -12   -0.09    0.15
   0 -12  12    0.05    0.14
  -1 -12 -12    0.39    0.10
   1 -12  12    0.59    0.16
  -1 -12 -12    0.57    0.15
  -1  12  12    0.40    0.15
   1 -12 -12    0.44    0.13
   1 -12 -12    0.33    0.10
   1  12  12    0.46    0.09
  -1  12 -12    0.41    0.11
  -1 -12  12    0.54    0.14
   2 -12  12    0.33    0.15
  -2 -12 -12    0.30    0.14
  -2 -12  12    0.45    0.13
  -2 -12  12    0.54    0.13
   2 -12 -12    0.53    0.11
   2  12  12    0.42    0.08
   0 -13  12    0.18    0.13
   0 -13 -12    0.20    0.09
   0 -13 -12    0.11    0.13
   1 -13  12    5.35    0.28
  -1 -13 -12    4.99    0.25
  -1 -13 -12    5.37    0.20
   1 -13 -12    5.34    0.20
  -1 -13  12    5.88    0.26
   1  13  12    5.44    0.19
   2 -13  12    0.77    0.15
  -2 -13 -12    0.70    0.13
   2  13  12    0.75    0.08
  -2 -13  12    0.83    0.13
   0   0 -13    0.00    0.14
   0   0  13    0.00    0.12
   1   0  13   14.25    0.41
   1   0 -13   14.62    0.47
  -1   0 -13   15.22    0.48
  -1   0 -13   14.08    0.46
   1   0  13   15.47    0.47
  -1   0  13   14.45    0.47
   2   0  13   10.66    0.40
  -2   0 -13   11.32    0.43
  -2   0  13   11.89    0.41
   2   0 -13   10.93    0.40
  -2   0 -13   11.32    0.40
   2   0  13   11.30    0.34
  -3   0 -13   10.23    0.40
   3   0  13    9.56    0.39
  -3   0 -13    9.65    0.44
   3   0  13   10.21    0.32
   4   0 -13    7.55    0.27
   4   0  13    7.76    0.27
   4   0  13    6.77    0.35
  -4   0 -13    7.15    0.40
   5   0  13    0.05    0.08
   0   1  13    2.42    0.19
   0   1 -13    2.19    0.19
   0  -1  13    2.49    0.19
   0  -1 -13    2.24    0.20
  -1  -1 -13    5.48    0.31
   1  -1  13    5.53    0.28
   1   1 -13    5.20    0.29
   1  -1  13    5.08    0.23
   1   1 -13    5.44    0.32
  -1   1  13    5.12    0.29
   1   1  13    5.15    0.28
   1  -1 -13    4.98    0.26
  -1  -1  13    4.40    0.25
   1   1  13    4.91    0.22
  -1   1 -13    5.05    0.29
   2  -1  13    3.13    0.17
   2  -1  13    3.22    0.23
  -2  -1 -13    3.29    0.24
  -2  -1 -13    3.22    0.22
   2   1  13    3.44    0.17
   2   1  13    3.09    0.22
  -2   1 -13    3.63    0.24
  -2  -1  13    3.42    0.22
   2  -1 -13    3.29    0.24
  -2   1 -13    2.91    0.21
   3  -1  13   10.28    0.32
  -3  -1 -13   10.07    0.44
   3  -1  13   10.41    0.41
  -3  -1 -13    9.95    0.39
   3   1  13   10.60    0.33
  -3   1 -13   10.60    0.44
   3   1  13   10.01    0.40
  -3  -1  13   10.84    0.41
   3  -1 -13   10.07    0.32
  -3   1 -13   10.67    0.40
   4  -1  13   12.55    0.44
  -4  -1 -13   12.19    0.48
   4  -1  13   12.42    0.36
   4   1  13   12.08    0.44
   4  -1 -13   12.25    0.36
   4   1  13   12.64    0.36
   5  -1  13    0.27    0.09
   5   1  13    0.29    0.09
   5   1  13    0.20    0.12
   0  -2  13    9.20    0.36
   0   2 -13    9.21    0.37
   0   2  13    9.86    0.36
   0  -2 -13    8.93    0.38
  -1   2  13    4.72    0.27
   1   2 -13    4.60    0.24
  -1  -2 -13    4.28    0.26
   1  -2  13    5.01    0.28
   1   2 -13    4.29    0.30
  -1  -2  13    5.05    0.28
   1   2  13    4.66    0.22
   1   2  13    4.97    0.28
   1  -2 -13    5.28    0.26
  -1   2 -13    4.87    0.26
   2  -2  13    4.90    0.29
  -2  -2 -13    5.49    0.28
   2  -2  13    5.09    0.22
  -2  -2 -13    5.24    0.29
  -2  -2  13    4.21    0.24
  -2   2 -13    5.61    0.31
   2   2  13    5.07    0.29
   2   2  13    5.23    0.23
  -2   2 -13    4.96    0.25
  -3  -2 -13   26.55    0.76
   3  -2  13   26.38    0.66
   3  -2  13   27.15    0.74
   3   2  13   25.58    0.73
  -3   2 -13   25.22    0.74
  -3  -2  13   26.34    0.71
   3   2  13   26.74    0.66
  -3   2 -13   26.95    0.70
   3  -2 -13   26.36    0.65
  -4  -2 -13    8.80    0.41
   4  -2  13    8.43    0.36
   4  -2  13    8.75    0.28
   4   2  13    8.29    0.28
   4   2  13    7.88    0.33
   4   2  13    7.62    0.50
   4  -2 -13    8.58    0.28
   5  -2  13    5.88    0.20
  -5  -2 -13    5.83    0.33
   5   2  13    5.78    0.20
   5   2  13    5.51    0.25
   0  -3 -13    4.60    0.27
   0  -3  13    5.77    0.30
   0   3 -13    5.58    0.29
   0   3  13    5.63    0.29
   0  -3  13    5.36    0.29
  -1   3  13    8.59    0.34
   1  -3  13    8.57    0.34
  -1  -3 -13    8.24    0.38
  -1   3 -13    7.94    0.35
   1  -3 -13    7.57    0.38
   1   3  13    8.19    0.29
   1   3  13    8.44    0.35
  -1  -3  13    8.80    0.35
   2  -3  13    2.71    0.27
   2  -3  13    2.74    0.16
  -2  -3 -13    2.61    0.24
   2  -3  13    2.76    0.22
  -2  -3  13    2.74    0.20
   2   3  13    2.39    0.16
  -2   3 -13    2.82    0.23
   2  -3 -13    2.61    0.16
   2   3  13    2.46    0.21
  -2   3 -13    2.57    0.20
  -3  -3 -13    8.38    0.41
   3  -3  13    8.71    0.46
   3  -3  13    8.19    0.28
   3  -3  13    8.18    0.36
  -3   3 -13    8.81    0.35
  -3  -3  13    8.06    0.35
  -3   3 -13    7.94    0.43
   3  -3 -13    8.53    0.29
   3   3  13    8.44    0.36
  -3   3 -13    7.96    0.42
   3   3  13    8.37    0.29
   4  -3  13    3.21    0.23
  -4  -3 -13    3.68    0.26
   4  -3  13    3.27    0.17
  -4   3 -13    3.32    0.30
  -4  -3  13    3.56    0.22
   4   3  13    3.03    0.20
   4  -3 -13    3.34    0.16
   4   3  13    3.18    0.17
   5  -3  13    4.31    0.17
  -5  -3 -13    3.91    0.24
  -5   3 -13    4.47    0.27
   5   3  13    4.39    0.18
   5   3  13    3.97    0.22
   0  -4  13   13.17    0.49
   0  -4 -13   13.17    0.48
   0   4 -13   13.90    0.44
   0  -4 -13   13.38    0.42
   0   4  13   14.08    0.46
   0  -4  13   13.93    0.46
   0   4  13   13.20    0.39
  -1  -4 -13   24.73    0.69
  -1   4  13   23.69    0.67
   1  -4  13   23.88    0.71
   1  -4  13   24.19    0.68
  -1  -4  13   23.85    0.66
  -1  -4  13   23.01    0.68
   1   4  13   24.17    0.68
   1   4  13   24.07    0.60
  -1   4 -13   24.24    0.66
  -2  -4 -13    3.41    0.26
   2  -4  13    3.66    0.18
   2  -4  13    3.80    0.28
   2  -4  13    3.80    0.25
  -2   4 -13    3.53    0.25
  -2  -4  13    3.63    0.24
   2   4  13    3.89    0.20
  -2  -4  13    3.36    0.22
  -2   4 -13    3.44    0.22
   2   4  13    3.59    0.24
   2  -4 -13    3.47    0.18
   3  -4  13    3.48    0.17
   3  -4  13    3.16    0.23
  -3  -4 -13    3.64    0.27
   3  -4  13    3.53    0.29
  -3  -4  13    3.44    0.24
   3   4  13    3.03    0.23
  -3  -4  13    3.41    0.22
   3   4  13    3.46    0.18
   3  -4 -13    3.54    0.17
  -3   4 -13    3.40    0.22
   4  -4  13   10.56    0.31
   4  -4  13    9.98    0.39
  -4  -4 -13   10.54    0.42
  -4   4 -13   10.59    0.37
   4  -4 -13    9.76    0.31
   4   4  13   10.60    0.31
  -4  -4  13    9.91    0.38
   4   4  13    9.79    0.35
  -4   4 -13   10.56    0.48
  -5  -4 -13    1.43    0.18
   5  -4  13    1.30    0.10
   5   4  13    1.01    0.13
   5   4  13    1.31    0.10
  -5   4 -13    1.34    0.20
   0  -5  13    4.28    0.28
   0   5 -13    4.83    0.25
   0  -5 -13    4.49    0.28
   0   5  13    4.36    0.28
   0  -5  13    4.23    0.24
   0  -5  13    4.34    0.26
   0   5  13    4.29    0.22
   0  -5 -13    4.89    0.25
   1  -5  13    0.58    0.16
  -1  -5 -13    0.57    0.20
  -1   5  13    0.58    0.15
   1  -5  13    0.42    0.19
   1   5  13    0.49    0.15
   1  -5 -13    0.34    0.13
  -1  -5  13    0.46    0.17
  -1   5 -13    0.55    0.16
  -1  -5  13    0.49    0.13
   1   5  13    0.51    0.11
   2  -5  13    3.25    0.17
   2  -5  13    3.07    0.23
   2  -5  13    3.33    0.27
  -2  -5 -13    3.62    0.27
  -2   5  13    2.92    0.23
  -2  -5  13    2.81    0.20
   2   5  13    3.30    0.17
  -2  -5  13    3.16    0.23
  -2   5 -13    3.04    0.24
   2   5  13    3.58    0.24
   2  -5 -13    3.15    0.17
  -2   5 -13    3.06    0.21
   3  -5  13   13.30    0.46
   3  -5  13   14.06    0.38
  -3  -5 -13   13.68    0.50
   3  -5  13   14.51    0.53
  -3  -5 -13   12.62    0.48
   3   5  13   13.24    0.46
   3   5  13   14.10    0.39
   3   5  13   13.24    0.45
   3  -5 -13   13.61    0.39
  -3   5 -13   13.59    0.43
  -3  -5  13   14.08    0.45
  -3  -5  13   12.93    0.46
   4  -5  13    2.46    0.14
  -4  -5 -13    2.53    0.23
   4  -5  13    2.59    0.21
   4   5  13    2.24    0.18
  -4  -5  13    2.65    0.20
  -4   5 -13    2.27    0.18
   4   5  13    2.32    0.14
  -4  -5  13    2.63    0.19
  -4   5 -13    2.21    0.26
   4  -5 -13    2.36    0.15
   5  -5  13    7.95    0.23
  -5  -5 -13    7.45    0.31
  -5   5 -13    8.22    0.35
  -5  -5  13    7.35    0.31
   5   5  13    8.21    0.27
   5   5  13    7.91    0.23
   0   6  13   21.59    0.62
   0   6 -13   20.52    0.59
   0  -6 -13   21.29    0.57
   0  -6  13   20.27    0.62
   0  -6  13   19.75    0.59
   0  -6 -13   20.79    0.55
   1  -6  13    8.07    0.35
  -1  -6 -13    8.61    0.42
   1  -6  13    7.82    0.39
  -1  -6 -13    8.45    0.31
  -1   6  13    8.05    0.35
  -1   6 -13    8.14    0.36
  -1  -6  13    7.90    0.33
   1  -6 -13    8.31    0.29
   1   6  13    8.41    0.36
  -1  -6  13    7.81    0.36
   1   6  13    8.10    0.29
  -2  -6 -13    4.94    0.30
   2  -6  13    5.30    0.30
   2  -6  13    5.03    0.23
   2  -6  13    5.16    0.32
  -2   6  13    4.32    0.26
  -2   6 -13    4.73    0.24
   2  -6 -13    5.29    0.23
   2   6  13    4.54    0.29
  -2  -6  13    4.75    0.27
  -2  -6  13    5.13    0.28
   2   6  13    5.58    0.23
   3  -6  13    2.67    0.26
  -3  -6 -13    2.39    0.24
   3  -6  13    2.41    0.21
  -3  -6 -13    2.60    0.23
   3  -6  13    2.74    0.15
   3  -6 -13    2.50    0.16
   3   6  13    2.61    0.22
  -3   6 -13    2.82    0.20
   3   6  13    2.62    0.16
   3   6  13    2.15    0.19
  -3  -6  13    3.16    0.20
  -3  -6  13    2.76    0.21
  -4  -6 -13    0.42    0.17
   4  -6  13    0.52    0.16
   4  -6  13    0.64    0.10
  -4  -6  13    0.45    0.14
  -4  -6  13    0.58    0.14
  -4   6 -13    0.49    0.21
   4   6  13    0.45    0.13
   4  -6 -13    0.38    0.11
   4   6  13    0.54    0.10
  -4   6 -13    0.41    0.14
  -5  -6 -13    0.34    0.16
   5  -6  13    0.46    0.07
  -5   6 -13    0.35    0.16
   5   6  13    0.29    0.10
   0  -7 -13    1.09    0.15
   0  -7 -13    0.85    0.14
   0  -7  13    0.50    0.15
   0   7  13    0.60    0.16
   0   7 -13    0.78    0.17
   0  -7  13    0.74    0.18
  -1   7  13    2.16    0.21
  -1  -7 -13    2.45    0.26
   1  -7  13    2.45    0.21
  -1  -7 -13    2.63    0.17
   1  -7  13    2.57    0.24
  -1  -7  13    2.23    0.21
   1  -7 -13    2.11    0.17
   1  -7 -13    2.63    0.17
  -1   7 -13    2.41    0.21
   1   7  13    2.46    0.22
  -1  -7  13    2.39    0.19
   1   7  13    2.54    0.16
   2  -7  13    0.44    0.19
  -2   7  13    0.61    0.17
  -2  -7 -13    0.45    0.21
  -2  -7 -13    0.72    0.20
   2  -7  13    0.50    0.11
   2  -7  13    0.52    0.15
  -2   7 -13    0.57    0.15
   2  -7 -13    0.53    0.13
  -2  -7  13    0.70    0.14
  -2  -7  13    0.59    0.17
   2   7  13    0.59    0.11
   2   7  13    0.67    0.17
  -3  -7 -13    3.96    0.25
   3  -7  13    4.36    0.19
   3  -7  13    4.19    0.28
   3  -7  13    4.14    0.27
  -3  -7 -13    3.76    0.27
   3   7  13    4.26    0.20
  -3  -7  13    3.88    0.22
   3  -7 -13    4.09    0.21
  -3  -7  13    4.70    0.28
  -3   7 -13    3.76    0.21
   3   7  13    4.06    0.23
   4  -7  13    0.94    0.10
  -4  -7 -13    0.95    0.18
   4   7  13    0.62    0.13
  -4   7 -13    0.68    0.20
   4   7  13    0.79    0.10
  -4  -7  13    0.80    0.13
  -4  -7  13    0.91    0.14
   0  -8 -13    9.15    0.32
   0   8 -13    8.85    0.36
   0   8  13    9.06    0.38
   0  -8 -13    9.54    0.34
   0  -8  13    9.02    0.36
   0  -8  13   10.53    0.41
   1  -8  13    2.81    0.24
  -1   8  13    2.64    0.22
  -1  -8 -13    2.70    0.17
  -1  -8 -13    2.28    0.31
   1  -8  13    2.59    0.22
   1  -8 -13    3.13    0.18
   1   8  13    2.62    0.22
  -1  -8  13    2.67    0.22
   1   8  13    2.86    0.16
   1  -8 -13    2.72    0.17
  -1  -8  13    2.46    0.19
  -2   8  13    1.55    0.19
   2  -8  13    2.11    0.22
   2  -8  13    1.93    0.20
  -2  -8 -13    2.09    0.22
  -2  -8 -13    1.92    0.24
   2  -8 -13    1.95    0.15
  -2  -8  13    2.45    0.20
  -2  -8  13    1.95    0.17
   2   8  13    1.77    0.14
  -2   8 -13    2.03    0.18
   2   8  13    1.83    0.19
  -3  -8 -13    0.25    0.16
   3  -8  13    0.20    0.17
  -3  -8 -13    0.19    0.18
   3  -8  13    0.26    0.09
   3  -8  13    0.19    0.14
  -3  -8  13    0.37    0.13
   3   8  13    0.27    0.09
  -3  -8  13    0.32    0.14
   3   8  13    0.40    0.15
  -3   8 -13    0.32    0.13
   3  -8 -13    0.29    0.11
   4  -8  13    1.85    0.11
  -4  -8 -13    1.83    0.18
   4   8  13    1.95    0.11
  -4   8 -13    2.32    0.21
   4   8  13    1.58    0.14
  -4  -8  13    1.87    0.15
  -4  -8  13    2.04    0.16
   0  -9 -13   10.64    0.34
   0  -9  13   11.82    0.43
   0   9 -13   10.96    0.40
   0  -9 -13   10.79    0.36
   0   9  13   11.64    0.41
   1  -9  13    1.23    0.20
  -1  -9 -13    1.88    0.15
   1  -9  13    1.67    0.20
  -1   9  13    1.61    0.19
  -1  -9 -13    1.43    0.21
   1   9  13    1.57    0.19
  -1  -9  13    1.76    0.19
   1  -9 -13    1.65    0.15
   1   9  13    1.65    0.13
   1  -9 -13    1.59    0.15
  -1  -9  13    1.33    0.16
  -2  -9 -13    1.39    0.23
   2  -9  13    1.34    0.18
  -2   9  13    1.28    0.18
  -2  -9 -13    1.35    0.19
   2  -9  13    1.37    0.20
   2   9  13    1.37    0.18
  -2  -9  13    1.38    0.17
  -2  -9  13    1.51    0.16
   2   9  13    1.54    0.12
   2  -9 -13    1.31    0.14
  -2   9 -13    1.50    0.15
  -3  -9 -13    0.10    0.17
   3  -9  13    0.11    0.16
  -3  -9 -13    0.21    0.15
   3  -9  13    0.11    0.13
   3  -9  13    0.20    0.08
  -3  -9  13    0.20    0.12
   3  -9 -13    0.20    0.11
   3   9  13    0.12    0.13
   3   9  13    0.15    0.08
  -3   9 -13    0.14    0.12
  -3  -9  13    0.13    0.13
  -4  -9 -13    0.39    0.14
   4  -9  13    0.55    0.07
  -4  -9  13    0.57    0.12
  -4   9 -13    0.62    0.16
   4   9  13    0.37    0.11
   4   9  13    0.67    0.13
  -4  -9  13    0.45    0.11
   0 -10 -13   18.10    0.47
   0  10  13   18.02    0.54
   0 -10  13   18.23    0.55
   0 -10 -13   16.91    0.48
  -1 -10 -13    0.10    0.11
   1 -10  13    0.16    0.16
  -1  10  13    0.27    0.15
   1  10 -13    0.21    0.14
  -1 -10 -13    0.40    0.17
   1 -10 -13    0.17    0.11
  -1 -10  13    0.32    0.13
  -1 -10  13    0.30    0.14
   1  10  13    0.29    0.15
   1  10  13    0.39    0.10
   1 -10 -13    0.11    0.13
   2 -10  13    1.42    0.18
  -2 -10 -13    1.24    0.18
  -2  10  13    1.30    0.17
   2 -10  13    1.69    0.19
  -2  10 -13    1.35    0.14
   2  10  13    1.34    0.11
  -2 -10  13    1.43    0.15
  -2 -10  13    1.50    0.17
   2 -10 -13    1.45    0.14
   3 -10  13    7.42    0.33
  -3 -10 -13    6.82    0.32
   3 -10  13    7.23    0.23
  -3 -10 -13    7.19    0.29
  -3 -10  13    7.80    0.27
  -3  10 -13    6.98    0.29
  -3 -10  13    7.85    0.30
   3  10  13    7.41    0.28
   3  10  13    7.96    0.23
  -3  10 -13    8.16    0.36
   0  11  13    1.36    0.17
   0 -11  13    1.48    0.18
   0 -11 -13    1.28    0.12
   1 -11  13    1.01    0.17
  -1  11  13    0.96    0.16
  -1 -11 -13    0.98    0.17
  -1 -11 -13    0.81    0.11
  -1 -11  13    0.86    0.16
   1  11  13    0.67    0.18
   1 -11 -13    1.02    0.12
   1  11  13    1.03    0.10
   1 -11 -13    0.86    0.13
   2 -11  13    0.58    0.16
  -2 -11 -13    0.42    0.14
  -2 -11  13    0.69    0.13
   2  11  13    0.55    0.09
  -2 -11  13    0.47    0.13
  -2  11 -13    0.46    0.12
   3 -11  13    3.07    0.19
  -3 -11 -13    2.60    0.19
   3  11  13    2.84    0.18
  -3 -11  13    2.88    0.17
   3  11  13    2.74    0.13
  -3  11 -13    3.21    0.21
   0 -12 -13   -0.06    0.09
   0  12  13   -0.04    0.08
   0 -12  13    0.01    0.14
  -1 -12 -13    2.91    0.19
  -1 -12 -13    2.92    0.16
   1 -12  13    3.43    0.21
  -1 -12  13    3.65    0.20
   1  12  13    3.25    0.15
  -1  12 -13    2.98    0.16
   1 -12 -13    3.20    0.17
   2 -12  13    1.25    0.16
  -2 -12 -13    1.09    0.17
   2  12  13    1.19    0.09
  -2 -12  13    1.36    0.14
   0 -13 -13    1.81    0.11
   0 -13  13    2.19    0.17
   0  13  13    1.96    0.10
   0   0  14    0.64    0.15
   0   0 -14    0.65    0.17
   1   0 -14   28.76    0.76
  -1   0 -14   27.90    0.77
   1   0  14   29.73    0.77
  -1   0 -14   28.51    0.74
   1   0  14   27.62    0.70
   2   0  14    3.78    0.20
   2   0 -14    3.98    0.25
   2   0  14    3.82    0.25
  -2   0 -14    3.99    0.26
  -2   0 -14    3.59    0.23
  -3   0 -14    1.50    0.19
  -3   0 -14    0.96    0.20
   3   0  14    1.64    0.19
   3   0  14    1.54    0.13
   4   0  14    4.35    0.29
   4   0  14    4.76    0.20
  -4   0 -14    4.43    0.28
   5   0  14    0.90    0.09
   0   1 -14    1.67    0.19
   0   1  14    1.89    0.19
   0  -1 -14    1.66    0.19
   0  -1  14    1.84    0.19
  -1  -1 -14   19.90    0.59
   1  -1  14   20.05    0.59
   1   1 -14   19.66    0.57
  -1   1  14   19.15    0.58
   1   1  14   19.11    0.51
  -1   1 -14   20.28    0.59
  -1   1 -14   19.58    0.55
   1   1  14   19.72    0.59
   1  -1 -14   19.02    0.57
   2  -1  14    7.36    0.26
  -2  -1 -14    7.28    0.35
  -2  -1 -14    6.98    0.38
   2   1 -14    7.11    0.34
   2  -1  14    7.06    0.34
   2  -1 -14    7.71    0.37
  -2   1 -14    7.97    0.37
   2   1  14    7.67    0.34
  -2  -1  14    7.24    0.34
  -2   1 -14    7.63    0.34
   2   1  14    7.35    0.26
   3   1 -14    2.79    0.22
  -3  -1 -14    2.45    0.24
   3  -1  14    2.86    0.16
   3  -1  14    2.75    0.22
  -3  -1  14    2.41    0.21
  -3   1 -14    2.57    0.24
  -3   1 -14    2.57    0.21
   3   1  14    2.75    0.16
   3   1  14    2.38    0.22
   4  -1  14   17.33    0.44
   4  -1  14   15.90    0.51
  -4  -1 -14   16.33    0.53
   4   1  14   16.02    0.52
   4   1  14   16.56    0.43
   5  -1  14    1.05    0.09
   5   1  14    1.13    0.10
   0  -2  14    0.66    0.15
   0  -2 -14    0.58    0.18
   0   2  14    0.80    0.16
   0   2 -14    0.36    0.15
  -1  -2 -14   11.86    0.45
  -1   2  14   11.51    0.42
   1   2 -14   11.61    0.41
   1  -2  14   11.84    0.42
  -1   2 -14   11.51    0.43
   1   2  14   12.56    0.43
   1   2  14   11.77    0.35
   1  -2 -14   11.45    0.43
  -1  -2  14   12.13    0.42
  -2  -2 -14   30.22    0.82
   2  -2  14   30.38    0.73
   2  -2  14   30.23    0.81
   2   2 -14   29.11    0.78
  -2  -2  14   30.04    0.79
   2   2  14   29.88    0.73
  -2   2 -14   29.62    0.80
   2   2  14   29.90    0.81
  -2   2 -14   29.71    0.77
   3   2 -14    2.04    0.20
   3  -2  14    1.99    0.14
  -3  -2 -14    1.90    0.22
   3  -2  14    1.65    0.20
  -3   2 -14    1.88    0.23
  -3  -2  14    2.12    0.19
   3   2  14    2.21    0.14
   3   2  14    1.87    0.20
  -3   2 -14    1.77    0.19
   4  -2  14   10.76    0.31
   4  -2  14    9.91    0.39
  -4  -2 -14   10.89    0.42
   4  -2 -14   10.31    0.32
   4   2  14   10.74    0.31
   5  -2  14    3.37    0.15
   5   2  14    3.24    0.15
   0   3 -14    5.41    0.30
   0  -3 -14    5.40    0.29
   0   3  14    5.52    0.30
   0  -3  14    5.44    0.30
   1  -3  14    0.96    0.17
   1   3 -14    0.92    0.17
  -1   3  14    0.91    0.17
  -1  -3 -14    0.93    0.20
   1   3  14    0.99    0.12
   1   3  14    0.81    0.16
   1  -3 -14    0.60    0.20
  -1   3 -14    0.86    0.17
  -1  -3  14    1.11    0.16
   2  -3  14    0.79    0.11
   2  -3  14    0.85    0.17
  -2  -3 -14    0.73    0.20
   2   3  14    0.84    0.12
  -2   3 -14    0.71    0.17
  -2   3 -14    0.72    0.18
  -2  -3  14    0.70    0.16
   2   3  14    0.61    0.16
  -3  -3 -14    1.82    0.22
   3  -3  14    1.79    0.13
   3  -3  14    1.81    0.19
   3   3  14    1.81    0.20
  -3   3 -14    1.79    0.18
  -3   3 -14    1.75    0.23
  -3  -3  14    2.00    0.19
   3   3  14    2.15    0.14
   3  -3 -14    1.70    0.15
  -4  -3 -14    0.29    0.18
   4   3 -14    0.29    0.16
   4  -3  14    0.49    0.15
   4  -3  14    0.48    0.10
   4   3  14    0.38    0.09
  -4  -3  14    0.40    0.15
   4  -3 -14    0.32    0.12
   5  -3  14    1.37    0.10
   5   3  14    1.39    0.09
   0   4 -14   13.92    0.46
   0   4  14   14.22    0.47
   0  -4 -14   14.11    0.50
   0  -4  14   14.76    0.71
   0   4  14   14.35    0.41
   0  -4  14   13.13    0.46
   1  -4  14   18.47    0.56
  -1  -4 -14   18.70    0.58
   1  -4  14   17.58    0.60
   1   4 -14   17.74    0.54
  -1   4  14   17.58    0.55
  -1   4 -14   17.26    0.55
   1   4  14   17.96    0.48
   1   4  14   19.06    0.56
  -1  -4  14   18.30    0.55
   2  -4  14   10.16    0.40
   2  -4  14    9.83    0.32
   2  -4  14    9.02    0.46
  -2  -4 -14   10.41    0.44
   2  -4 -14    9.96    0.34
  -2   4 -14    9.97    0.37
   2   4  14   10.09    0.39
  -2  -4  14    9.95    0.38
  -2   4 -14   10.12    0.41
   2   4  14    9.98    0.31
   3  -4  14   10.13    0.47
   3  -4  14   11.62    0.33
  -3  -4 -14   11.77    0.45
   3  -4  14   11.37    0.41
  -3  -4  14   11.31    0.40
   3   4  14   11.53    0.34
   3  -4 -14   11.21    0.34
   3   4  14   11.14    0.41
  -3   4 -14   11.72    0.39
  -3   4 -14   10.66    0.52
   4  -4  14    7.74    0.24
  -4  -4 -14    8.07    0.35
   4  -4  14    6.99    0.33
  -4   4 -14    7.20    0.42
   4  -4 -14    7.35    0.26
   4   4  14    7.69    0.24
  -4  -4  14    7.71    0.31
   5  -4  14    1.79    0.10
   5   4  14    1.70    0.14
   0  -5 -14    7.21    0.40
   0   5  14    7.24    0.27
   0   5 -14    7.36    0.34
   0   5  14    7.54    0.34
   0  -5  14    7.08    0.39
  -1   5  14    4.31    0.26
   1   5 -14    4.66    0.25
   1  -5  14    3.89    0.25
  -1  -5 -14    4.27    0.28
   1  -5  14    4.46    0.29
  -1  -5  14    4.20    0.24
  -1   5 -14    4.36    0.25
   1   5  14    3.95    0.21
  -1  -5  14    4.35    0.27
   1   5  14    4.28    0.28
  -2  -5 -14    9.45    0.42
   2  -5  14    8.25    0.36
   2  -5  14    8.77    0.43
   2  -5  14    8.63    0.29
  -2  -5  14    8.77    0.38
  -2   5 -14    8.21    0.39
   2  -5 -14    8.74    0.30
   2   5  14    9.35    0.30
   2   5  14    8.82    0.37
  -2   5 -14    9.00    0.34
  -2  -5  14    8.94    0.36
   3  -5  14    0.28    0.15
   3  -5  14    0.19    0.19
   3  -5  14    0.20    0.09
  -3  -5 -14    0.02    0.19
  -3  -5  14    0.01    0.13
  -3   5 -14    0.04    0.22
   3   5  14    0.18    0.16
  -3  -5  14    0.09    0.16
   3   5  14    0.26    0.10
  -3   5 -14    0.28    0.14
   3  -5 -14    0.10    0.12
   4  -5  14   10.09    0.29
  -4  -5 -14    9.83    0.39
  -4  -5  14   10.53    0.41
  -4  -5  14   10.26    0.35
  -4   5 -14   10.29    0.44
   4   5  14    9.88    0.34
   4   5  14   10.51    0.29
   0  -6  14    5.67    0.31
   0   6  14    5.05    0.30
   0  -6 -14    5.14    0.26
   0   6 -14    4.96    0.29
   0   6  14    5.24    0.23
   1  -6  14    4.68    0.30
   1  -6  14    4.85    0.30
  -1  -6 -14    4.51    0.29
  -1   6  14    4.30    0.29
   1   6  14    4.83    0.29
   1  -6 -14    4.64    0.25
  -1  -6  14    4.66    0.27
   1   6  14    4.87    0.22
  -1  -6  14    4.75    0.28
  -1   6 -14    4.81    0.26
   2  -6  14    3.33    0.17
   2  -6  14    3.07    0.26
  -2  -6 -14    3.09    0.26
  -2   6  14    3.17    0.25
   2  -6  14    3.07    0.23
  -2   6 -14    3.11    0.20
   2  -6 -14    3.17    0.17
  -2  -6  14    3.11    0.20
   2   6  14    2.74    0.22
   2   6  14    3.04    0.16
  -2  -6  14    3.65    0.24
   3  -6  14    0.09    0.18
   3  -6  14    0.01    0.09
   3  -6  14    0.03    0.14
  -3  -6 -14    0.00    0.18
   3  -6 -14    0.21    0.12
  -3  -6  14    0.00    0.15
   3   6  14    0.03    0.09
  -3   6 -14   -0.07    0.13
   3   6  14    0.00    0.16
  -3  -6  14   -0.08    0.12
  -4  -6 -14   -0.07    0.15
   4  -6  14   -0.03    0.07
   4   6  14    0.02    0.12
  -4   6 -14    0.00    0.19
   4   6  14    0.08    0.08
  -4  -6  14   -0.05    0.13
  -4  -6  14    0.02    0.12
   0   7 -14   13.07    0.44
   0   7  14   13.69    0.39
   0  -7  14   13.37    0.49
   0  -7 -14   13.57    0.40
   0   7  14   13.81    0.46
  -1   7  14    3.17    0.23
   1  -7  14    3.63    0.26
  -1  -7 -14    3.49    0.27
   1  -7  14    3.88    0.25
   1  -7 -14    3.28    0.19
  -1  -7  14    3.76    0.22
  -1   7 -14    3.43    0.23
  -1  -7  14    3.78    0.24
   1   7  14    3.33    0.17
   1   7  14    3.41    0.24
  -2  -7 -14    3.04    0.26
   2  -7  14    3.56    0.24
   2  -7  14    3.43    0.26
  -2   7  14    3.65    0.24
   2   7  14    3.87    0.19
  -2  -7  14    3.62    0.21
   2  -7 -14    3.61    0.19
   2   7  14    3.47    0.23
  -2   7 -14    3.31    0.20
  -2  -7  14    3.65    0.24
  -3  -7 -14    0.53    0.18
   3  -7  14    0.55    0.10
   3  -7  14    0.82    0.16
   3  -7  14    0.64    0.18
   3   7  14    0.59    0.14
  -3   7 -14    0.41    0.13
   3  -7 -14    0.54    0.12
  -3  -7  14    0.61    0.15
   3   7  14    0.63    0.10
  -3  -7  14    0.66    0.13
   4  -7  14    1.65    0.10
  -4  -7 -14    1.51    0.17
  -4   7 -14    1.60    0.20
   4   7  14    1.70    0.10
  -4  -7  14    1.80    0.15
  -4  -7  14    1.67    0.14
   4   7  14    1.50    0.13
   0   8 -14   12.30    0.41
   0   8  14   12.58    0.36
   0  -8  14   12.32    0.45
   0   8  14   12.75    0.44
   0  -8 -14   11.95    0.39
   0  -8 -14   12.59    0.37
  -1   8  14    6.96    0.32
   1   8 -14    6.48    0.30
   1  -8  14    6.45    0.33
   1  -8  14    7.09    0.37
   1  -8 -14    6.73    0.28
   1   8  14    6.59    0.32
  -1  -8  14    6.73    0.30
   1   8  14    7.05    0.25
  -1  -8  14    6.85    0.33
   2  -8  14    4.48    0.27
  -2  -8 -14    3.87    0.27
   2  -8  14    4.31    0.28
  -2   8  14    4.55    0.28
  -2   8 -14    4.72    0.22
   2  -8 -14    4.52    0.23
   2   8  14    4.55    0.20
  -2  -8  14    4.87    0.25
  -2  -8  14    4.48    0.28
   2   8  14    4.52    0.28
   3  -8  14    0.73    0.09
  -3  -8 -14    0.72    0.18
   3  -8  14    0.82    0.18
   3   8  14    0.79    0.10
  -3  -8  14    0.80    0.15
  -3  -8  14    0.89    0.13
   3   8  14    0.80    0.14
  -3   8 -14    0.59    0.13
  -3   8 -14    1.03    0.21
  -4  -8 -14    0.32    0.18
   4  -8  14    0.22    0.07
   4   8  14    0.18    0.10
  -4   8 -14    0.21    0.16
   0  -9 -14    1.99    0.17
   0   9  14    2.18    0.14
   0  -9 -14    1.96    0.15
   0   9  14    1.65    0.19
   0  -9  14    2.14    0.20
   0   9 -14    1.98    0.18
  -1   9  14    0.83    0.11
   1  -9  14    0.77    0.18
   1   9 -14    0.94    0.15
  -1   9  14    0.84    0.16
  -1  -9  14    1.04    0.15
   1   9  14    0.89    0.16
  -1  -9  14    0.97    0.17
   1   9  14    0.85    0.10
   1  -9 -14    0.86    0.13
   1  -9 -14    0.92    0.14
   2  -9  14    0.53    0.17
  -2  -9 -14    0.40    0.21
  -2  -9 -14    0.38    0.20
   2  -9  14    0.44    0.15
   2   9  14    0.46    0.25
  -2  -9  14    0.48    0.14
   2   9  14    0.48    0.09
  -2   9 -14    0.28    0.13
  -2  -9  14    0.48    0.13
   2  -9 -14    0.34    0.12
  -3  -9 -14    0.93    0.17
   3  -9  14    1.61    0.10
   3  -9  14    1.45    0.18
  -3  -9  14    1.60    0.15
  -3   9 -14    1.35    0.20
  -3   9 -14    1.26    0.15
   3   9  14    1.16    0.10
   3   9  14    1.21    0.14
  -3  -9  14    1.25    0.13
   0  10  14    2.10    0.13
   0  10  14    2.09    0.19
   0 -10  14    2.78    0.21
   0 -10 -14    2.20    0.14
   1  10 -14    8.75    0.32
  -1  10  14    8.76    0.27
   1 -10  14    8.90    0.36
  -1  10  14    8.68    0.34
   1  10  14    8.82    0.26
   1 -10 -14    8.46    0.28
  -1 -10  14    8.27    0.33
  -1 -10  14    9.29    0.35
   1  10  14    8.01    0.33
   2  10 -14    1.47    0.14
   2 -10  14    1.43    0.18
  -2 -10 -14    1.07    0.17
  -2 -10  14    1.30    0.14
   2  10  14    1.37    0.10
  -2  10 -14    1.34    0.14
  -2 -10  14    1.49    0.16
   3  10 -14    0.33    0.14
   3 -10  14    0.13    0.13
   3  10  14    0.25    0.07
  -3 -10  14    0.38    0.14
  -3 -10  14    0.32    0.11
  -3  10 -14    0.44    0.15
   0 -11 -14    0.18    0.10
   0  11  14    0.24    0.08
   0 -11  14    0.23    0.14
  -1  11  14    2.09    0.12
   1 -11  14    2.30    0.19
  -1 -11  14    2.23    0.18
   1  11  14    1.94    0.11
   1 -11 -14    1.97    0.13
  -1  11 -14    2.22    0.15
   2 -11  14    4.28    0.26
   2  11  14    3.97    0.16
  -2 -11  14    4.27    0.23
   0 -12  14    6.67    0.28
   0  12  14    6.35    0.20
   0   0 -15    0.02    0.16
   0   0  15   -0.06    0.14
  -1   0 -15   39.31    1.04
   1   0  15   44.52    1.08
  -1   0 -15   43.19    1.08
   1   0 -15   44.13    1.07
   2   0  15   11.14    0.33
  -2   0 -15   10.80    0.40
   2   0  15    9.95    0.40
   2   0 -15   10.97    0.41
  -2   0 -15   11.02    0.43
   3   0  15    0.44    0.16
   3   0  15    0.37    0.10
  -3   0 -15    0.50    0.18
  -4   0 -15    0.56    0.18
   4   0  15    0.51    0.09
   0   1 -15    0.12    0.16
   0  -1  15    0.23    0.15
   0   1  15    0.08    0.14
   0  -1 -15    0.01    0.16
  -1  -1 -15    8.00    0.38
   1   1 -15    8.05    0.35
   1  -1  15    8.27    0.35
  -1   1  15    7.06    0.44
   1   1  15    8.00    0.34
   1   1  15    7.76    0.28
  -1   1 -15    8.10    0.35
   1  -1 -15    7.72    0.36
  -1   1 -15    7.78    0.37
  -2  -1 -15    0.26    0.18
   2  -1  15    0.32    0.15
   2  -1  15    0.22    0.11
  -2  -1 -15    0.10    0.18
   2   1 -15    0.17    0.17
   2   1  15    0.36    0.15
  -2   1 -15    0.32    0.16
  -2   1 -15    0.44    0.18
   2   1  15    0.29    0.10
   2  -1 -15    0.31    0.19
   3   1 -15   11.71    0.42
  -3  -1 -15   11.89    0.44
   3  -1  15   12.53    0.35
   3  -1  15   12.14    0.43
   3   1  15   12.61    0.35
   3   1  15   11.95    0.42
  -3   1 -15   12.02    0.45
  -3   1 -15   12.18    0.41
  -4  -1 -15    3.11    0.23
   4  -1  15    3.03    0.16
   4   1  15    3.37    0.16
   0  -2 -15   27.72    0.76
   0  -2  15   28.45    0.76
   0   2  15   28.20    0.77
   0   2 -15   28.39    0.76
   1  -2  15   15.72    0.50
   1   2 -15   16.17    0.49
  -1   2  15   14.35    0.49
  -1  -2 -15   16.44    0.53
   1   2  15   15.53    0.43
   1  -2 -15   15.56    0.52
  -1   2 -15   15.29    0.47
  -1   2 -15   15.63    0.51
   1   2  15   15.41    0.50
   2  -2  15    1.88    0.14
   2  -2  15    2.04    0.20
   2   2 -15    1.94    0.20
  -2  -2 -15    1.93    0.22
   2   2  15    1.92    0.14
  -2   2 -15    1.67    0.21
   2   2  15    1.74    0.19
  -2   2 -15    1.85    0.18
   3   2 -15   14.29    0.46
   3  -2  15   14.48    0.39
   3  -2  15   13.60    0.46
  -3  -2 -15   14.44    0.48
   3   2  15   14.02    0.46
  -3   2 -15   13.67    0.48
  -3   2 -15   14.30    0.44
   3   2  15   14.53    0.39
  -4  -2 -15    2.27    0.20
   4  -2  15    2.12    0.12
   4   2  15    2.14    0.12
   0   3  15   18.64    0.57
   0  -3  15   18.05    0.57
   0   3 -15   19.71    0.56
   0  -3 -15   18.96    0.58
   1   3 -15    3.84    0.23
   1  -3  15    3.47    0.24
  -1   3  15    2.94    0.23
  -1  -3 -15    2.95    0.25
   1  -3 -15    3.18    0.25
  -1   3 -15    3.04    0.22
  -1   3 -15    3.44    0.21
   1   3  15    3.41    0.23
   1   3  15    3.45    0.17
  -2  -3 -15   15.37    0.51
   2   3 -15   15.57    0.47
   2  -3  15   14.14    0.41
   2  -3  15   14.54    0.49
  -2   3 -15   15.43    0.47
   2   3  15   15.10    0.49
   2   3  15   15.19    0.41
  -2  -3  15   15.34    0.48
  -2   3 -15   13.90    0.49
   3   3 -15    0.63    0.16
  -3  -3 -15    0.76    0.19
   3  -3  15    0.50    0.10
   3  -3  15    0.50    0.15
  -3   3 -15    0.63    0.20
   3   3  15    0.62    0.10
  -3   3 -15    0.61    0.15
   3   3  15    0.65    0.16
  -3  -3  15    0.75    0.15
   4  -3  15    3.96    0.17
  -4  -3 -15    3.78    0.23
   4   3  15    4.01    0.17
   0   4 -15    0.03    0.15
   0  -4 -15    0.15    0.19
   0   4  15    0.02    0.14
   0  -4  15    0.06    0.21
  -1   4  15    6.50    0.33
  -1  -4 -15    6.65    0.37
   1   4 -15    6.67    0.32
   1  -4  15    6.63    0.33
   1   4  15    6.90    0.33
   1   4  15    7.11    0.25
  -1   4 -15    6.83    0.34
  -1  -4  15    7.14    0.33
  -2  -4 -15    8.01    0.38
   2  -4  15    7.73    0.34
   2  -4  15    7.68    0.27
   2   4 -15    7.61    0.33
  -2  -4  15    7.86    0.33
  -2   4 -15    8.16    0.33
  -2   4 -15    8.42    0.36
   2   4  15    8.38    0.27
   2   4  15    7.05    0.33
   3  -4  15    8.58    0.35
   3   4 -15    9.07    0.34
   3  -4  15    8.47    0.27
  -3  -4 -15    9.08    0.39
   3   4  15    8.41    0.35
  -3  -4  15    9.26    0.34
   3   4  15    8.95    0.28
  -3   4 -15    8.90    0.33
   4   4 -15    5.04    0.26
   4  -4  15    4.96    0.18
  -4  -4 -15    4.75    0.25
   4   4  15    4.83    0.18
   0   5 -15   16.24    0.49
   0  -5 -15   15.36    0.54
   0   5  15   15.27    0.44
   0  -5  15   16.01    0.54
   0   5  15   16.59    0.51
   1   5 -15    3.34    0.22
   1  -5  15    3.73    0.24
  -1  -5 -15    3.70    0.27
   1  -5  15    3.44    0.27
  -1   5  15    3.04    0.23
   1   5  15    3.51    0.24
  -1   5 -15    3.42    0.22
   1   5  15    3.44    0.17
  -1  -5  15    3.59    0.22
  -1  -5  15    3.69    0.26
   2  -5  15    1.66    0.23
  -2  -5 -15    1.92    0.22
   2  -5  15    1.91    0.19
   2   5 -15    1.63    0.18
  -2   5 -15    2.28    0.18
  -2   5 -15    1.66    0.20
   2   5  15    1.83    0.13
   2   5  15    1.74    0.19
  -2  -5  15    1.67    0.17
   3   5 -15    5.52    0.27
   3  -5  15    5.15    0.20
   3  -5  15    4.87    0.28
  -3  -5 -15    5.08    0.27
   3  -5  15    5.28    0.28
  -3  -5  15    4.97    0.27
   3  -5 -15    4.78    0.23
   3   5  15    4.72    0.29
  -3   5 -15    5.43    0.26
   3   5  15    5.72    0.21
  -3   5 -15    4.63    0.31
   4   5 -15    0.74    0.14
  -4  -5 -15    0.64    0.16
   4  -5  15    0.63    0.08
   4   5  15    0.65    0.08
  -4   5 -15    0.60    0.23
  -4  -5  15    0.60    0.13
   0   6  15    0.29    0.15
   0   6  15    0.25    0.10
   0   6 -15    0.35    0.15
   0  -6  15    0.32    0.18
   1  -6  15    6.16    0.36
   1   6 -15    5.68    0.29
   1  -6  15    5.26    0.30
  -1  -6 -15    5.40    0.30
  -1   6  15    5.27    0.29
  -1  -6  15    5.45    0.29
   1   6  15    5.05    0.30
   1   6  15    5.41    0.22
  -1  -6  15    5.77    0.33
  -1   6 -15    5.41    0.30
  -2  -6 -15    1.74    0.22
   2  -6  15    2.02    0.22
   2  -6  15    1.79    0.18
   2   6 -15    1.72    0.17
   2   6  15    1.51    0.18
   2   6  15    1.85    0.13
  -2  -6  15    1.97    0.20
  -2   6 -15    1.53    0.16
  -2  -6  15    1.74    0.16
   2  -6 -15    1.47    0.20
   3  -6  15    0.33    0.09
  -3  -6 -15    0.41    0.17
   3  -6  15    0.56    0.14
   3   6 -15    0.66    0.14
   3  -6  15    0.56    0.18
  -3  -6  15    0.58    0.16
  -3  -6  15    0.58    0.13
   3   6  15    0.51    0.09
  -3   6 -15    0.39    0.21
  -3   6 -15    0.63    0.14
  -4  -6 -15    1.59    0.16
   4  -6  15    1.67    0.10
   4   6  15    1.66    0.10
   0   7  15    0.38    0.10
   0   7 -15    0.26    0.14
   0   7  15    0.38    0.15
   0  -7  15    0.37    0.17
  -1   7  15    6.28    0.31
   1  -7  15    6.30    0.36
   1  -7  15    5.90    0.32
   1   7 -15    6.62    0.30
  -1  -7 -15    6.00    0.32
   1   7  15    6.84    0.24
  -1  -7  15    6.70    0.30
   1   7  15    6.66    0.31
  -1   7 -15    7.01    0.32
  -1  -7  15    6.95    0.34
   2  -7  15    5.59    0.34
   2  -7  15    5.50    0.28
   2   7 -15    5.42    0.26
  -2  -7 -15    5.43    0.29
   2  -7 -15    5.35    0.25
  -2  -7  15    5.88    0.30
   2   7  15    5.18    0.29
  -2   7 -15    5.70    0.26
  -2  -7  15    6.01    0.27
   2   7  15    6.03    0.21
   3  -7  15    8.13    0.35
   3  -7  15    8.17    0.25
  -3  -7 -15    8.53    0.35
   3   7 -15    8.79    0.30
  -3  -7  15    8.53    0.30
   3   7  15    8.63    0.25
  -3   7 -15    8.43    0.39
  -3  -7  15    8.18    0.32
  -3   7 -15    8.60    0.30
   0  -8  15    3.88    0.25
   0   8 -15    3.71    0.21
   0   8  15    3.93    0.24
   0   8  15    4.04    0.19
  -1   8  15    1.35    0.17
   1  -8  15    1.45    0.19
   1   8 -15    1.63    0.16
   1   8  15    1.60    0.18
   1   8  15    1.60    0.12
  -1  -8  15    1.32    0.18
   2  -8  15    3.25    0.23
  -2  -8 -15    2.72    0.23
   2   8 -15    2.96    0.18
  -2   8 -15    3.19    0.18
   2   8  15    3.29    0.16
  -2  -8  15    3.31    0.19
  -2  -8  15    3.46    0.21
   3   8 -15    2.36    0.15
   3  -8  15    2.46    0.19
  -3  -8 -15    2.01    0.18
  -3   8 -15    2.22    0.21
  -3   8 -15    2.18    0.15
   3   8  15    2.11    0.11
  -3  -8  15    2.24    0.15
  -3  -8  15    2.26    0.16
   0   9  15    1.92    0.18
   0   9 -15    1.64    0.16
   0   9  15    1.73    0.12
   0  -9  15    2.14    0.20
   1  -9  15    2.60    0.21
   1   9 -15    2.59    0.17
   1   9  15    2.65    0.13
  -1   9 -15    2.32    0.16
  -1  -9  15    2.63    0.20
   2  -9  15    0.79    0.16
   2   9 -15    0.62    0.12
  -2  -9  15    0.79    0.14
  -2  -9  15    0.62    0.12
   2   9  15    0.65    0.09
  -2   9 -15    0.79    0.13
   0 -10  15    4.59    0.27
   0  10  15    3.95    0.17
   1 -10  15    1.12    0.17
   1  10 -15    1.00    0.13
  -1  10 -15    0.96    0.13
   1  10  15    0.91    0.09
  -1 -10  15    1.28    0.16
   2 -10  15    0.12    0.14
   2  10  15    0.05    0.07
  -2  10 -15    0.31    0.12
  -2 -10  15    0.14    0.12
   0 -11  15    0.26    0.13
   0  11  15    0.22    0.08
   0   0  16    0.18    0.15
   0   0 -16    0.11    0.16
   1   0 -16    0.19    0.16
  -1   0 -16    0.20    0.17
   1   0  16    0.19    0.14
   2   0 -16    6.61    0.33
  -2   0 -16    6.86    0.34
   2   0  16    6.31    0.32
   2   0  16    6.39    0.24
  -2   0 -16    6.39    0.28
  -3   0 -16    0.79    0.17
   3   0  16    0.76    0.16
   3   0  16    0.63    0.10
  -4   0 -16    1.85    0.25
   4   0  16    2.01    0.11
   0   1  16   20.19    0.61
   0   1 -16   22.67    0.62
   0  -1  16   21.15    0.62
   0  -1 -16   22.13    0.62
   1   1 -16    3.75    0.23
  -1  -1 -16    3.69    0.25
   1  -1  16    3.82    0.24
  -1   1 -16    3.69    0.23
   1   1  16    3.85    0.24
  -1   1 -16    3.87    0.24
   1  -1 -16    3.68    0.24
   2   1 -16   10.39    0.38
   2  -1  16    9.75    0.38
  -2  -1 -16   10.00    0.41
   2  -1  16    9.63    0.30
   2   1  16    9.76    0.30
  -2   1 -16    9.67    0.39
  -2   1 -16   10.10    0.37
   2  -1 -16    9.50    0.40
   2   1  16   10.53    0.39
   3  -1  16    4.59    0.27
  -3  -1 -16    4.61    0.25
   3  -1  16    4.71    0.19
   3   1  16    5.14    0.20
   3   1  16    4.33    0.28
  -3   1 -16    4.96    0.26
   4  -1  16    0.35    0.08
  -4  -1 -16    0.44    0.16
   4   1  16    0.35    0.08
   0   2 -16    7.53    0.33
   0  -2  16    8.17    0.35
   0   2 -16    8.09    0.35
   0  -2 -16    7.94    0.37
   0   2  16    7.68    0.34
  -1  -2 -16    0.92    0.19
   1   2 -16    0.95    0.16
   1  -2  16    1.01    0.17
  -1   2 -16    0.94    0.17
   1   2  16    0.92    0.17
  -1   2 -16    1.17    0.17
   1   2  16    0.82    0.12
   1  -2 -16    0.47    0.18
   2   2 -16   13.09    0.43
   2  -2  16   12.91    0.44
  -2  -2 -16   13.48    0.47
   2  -2  16   12.25    0.36
  -2   2 -16   13.41    0.45
   2   2  16   13.10    0.44
  -2   2 -16   12.95    0.41
   2   2  16   12.62    0.36
  -3  -2 -16    9.48    0.37
   3  -2  16    8.65    0.35
   3   2 -16    8.61    0.35
   3  -2  16    9.02    0.27
   3   2  16    8.75    0.35
   3   2  16    9.12    0.27
  -3   2 -16    9.18    0.33
  -3   2 -16    9.20    0.37
  -4  -2 -16    6.58    0.31
   4  -2  16    7.04    0.21
   4   2  16    7.22    0.21
   0   3 -16    1.26    0.17
   0  -3  16    1.00    0.29
   0   3  16    1.09    0.17
   0  -3 -16    0.88    0.20
   1  -3  16    4.79    0.29
   1   3 -16    5.07    0.29
  -1  -3 -16    4.81    0.27
  -1   3  16    4.74    0.29
   1   3  16    4.99    0.29
   1   3  16    4.81    0.21
  -1   3 -16    4.61    0.26
  -1   3 -16    5.19    0.24
   1  -3 -16    5.17    0.28
   2  -3  16    2.67    0.21
  -2  -3 -16    2.71    0.23
   2   3 -16    2.84    0.20
   2  -3  16    2.47    0.14
   2   3  16    2.72    0.15
  -2   3 -16    2.40    0.21
   2   3  16    2.71    0.21
  -2   3 -16    2.36    0.18
   3   3 -16    1.09    0.17
   3  -3  16    1.00    0.16
   3  -3  16    1.12    0.10
  -3  -3 -16    1.38    0.19
  -3   3 -16    1.26    0.23
   3   3  16    0.96    0.17
   3   3  16    1.09    0.10
  -3   3 -16    1.18    0.15
  -4  -3 -16    1.20    0.16
   4  -3  16    1.34    0.09
   4   3  16    1.24    0.09
   0   4  16    0.01    0.14
   0   4 -16    0.10    0.14
   0  -4 -16    0.02    0.18
  -1  -4 -16    7.27    0.37
  -1   4  16    7.40    0.34
   1   4 -16    7.70    0.32
   1  -4  16    8.07    0.34
  -1   4 -16    7.11    0.33
   1   4  16    7.68    0.34
   1   4  16    8.08    0.26
  -1   4 -16    7.94    0.31
   2  -4  16    0.04    0.14
   2   4 -16    0.01    0.14
  -2  -4 -16    0.12    0.17
   2   4  16    0.03    0.09
   2   4  16    0.07    0.14
  -2   4 -16    0.03    0.16
  -2   4 -16    0.01    0.13
   3   4 -16    6.38    0.28
  -3  -4 -16    6.23    0.31
   3  -4  16    5.93    0.21
   3   4  16    6.11    0.21
  -3   4 -16    6.55    0.27
   4  -4  16    9.47    0.26
   4   4  16    9.64    0.26
   0   5 -16    9.86    0.36
   0   5  16    9.18    0.36
   0  -5 -16    9.28    0.41
   1   5 -16    4.66    0.27
  -1  -5 -16    3.77    0.26
  -1   5  16    4.21    0.25
   1  -5  16    4.28    0.28
  -1   5 -16    4.81    0.22
  -1   5 -16    4.52    0.24
   1   5  16    4.49    0.20
   1   5  16    4.38    0.27
   2   5 -16    0.31    0.14
  -2  -5 -16    0.61    0.18
   2  -5  16    0.57    0.15
   2   5  16    0.44    0.09
  -2   5 -16    0.58    0.17
   2   5  16    0.37    0.15
  -2   5 -16    0.57    0.14
   3  -5  16    0.63    0.09
  -3  -5 -16    0.63    0.16
   3   5 -16    0.82    0.14
  -3   5 -16    0.71    0.13
   3   5  16    0.68    0.09
   0   6  16    1.28    0.17
   0   6 -16    1.06    0.15
   0  -6  16    1.17    0.20
   1  -6  16    2.37    0.22
   1  -6  16    2.09    0.20
  -1   6  16    1.19    0.18
   1   6 -16    1.65    0.17
  -1  -6 -16    1.56    0.21
  -1   6 -16    1.81    0.16
  -1  -6  16    1.89    0.20
   1   6  16    1.97    0.19
  -1   6 -16    1.46    0.18
   1   6  16    2.03    0.13
  -2  -6 -16    0.68    0.18
   2  -6  16    0.90    0.16
   2   6 -16    0.99    0.14
   2  -6  16    0.80    0.19
   2   6  16    0.77    0.16
  -2   6 -16    1.08    0.14
   2   6  16    1.18    0.11
   3  -6  16    0.49    0.09
  -3  -6 -16    0.34    0.16
   3   6 -16    0.57    0.13
   3   6  16    0.45    0.08
  -3   6 -16    0.59    0.12
  -3   6 -16    0.45    0.21
   0  -7  16    3.69    0.24
   0   7 -16    3.20    0.19
   0   7  16    3.16    0.15
   0   7  16    3.11    0.21
  -1   7  16    2.02    0.19
   1   7 -16    2.26    0.17
  -1  -7 -16    2.14    0.22
   1  -7  16    2.12    0.21
  -1  -7  16    2.29    0.20
   1   7  16    2.23    0.13
  -1   7 -16    1.87    0.18
  -1   7 -16    2.23    0.16
   1   7  16    2.10    0.19
   2  -7  16    0.89    0.18
  -2  -7 -16    0.97    0.18
   2   7 -16    0.85    0.13
  -2   7 -16    1.06    0.13
   2   7  16    0.93    0.10
  -2  -7  16    0.99    0.16
   3   7 -16    5.49    0.23
  -3  -7 -16    5.03    0.27
  -3   7 -16    5.64    0.23
   3   7  16    5.51    0.18
   0  -8  16    0.21    0.16
   0   8 -16    0.27    0.13
   0   8  16    0.16    0.09
   1  -8  16    3.24    0.22
   1   8 -16    2.70    0.17
  -1  -8  16    2.87    0.20
   1   8  16    3.01    0.16
  -1   8 -16    3.28    0.17
  -2  -8 -16    0.71    0.18
   2   8 -16    0.61    0.12
   2  -8  16    0.78    0.16
  -2   8 -16    0.94    0.13
  -2  -8  16    0.81    0.15
   2   8  16    0.78    0.09
   0  -9  16    1.84    0.18
   0   9  16    2.20    0.12
   1   9 -16    0.69    0.12
   1  -9  16    0.71    0.16
   1   9  16    0.78    0.09
  -1  -9  16    0.65    0.15
  -1   9 -16    1.03    0.13
   0  10 -16    0.00    0.10
   0 -10  16    0.09    0.13
   0   0 -17    0.07    0.15
   0   0  17   -0.03    0.15
   1   0  17    0.95    0.16
   1   0 -17    0.91    0.17
  -1   0 -17    0.93    0.18
   2   0  17    8.72    0.27
   2   0  17    9.47    0.36
   2   0 -17    9.05    0.36
  -2   0 -17    9.52    0.36
   3   0  17    0.33    0.08
  -3   0 -17    0.04    0.15
   0   1 -17    0.25    0.16
   0   1  17    0.32    0.15
   0  -1 -17    0.18    0.16
   0  -1  17    0.31    0.16
  -1  -1 -17    2.48    0.21
   1  -1  17    2.69    0.21
   1   1 -17    2.51    0.20
  -1   1 -17    2.58    0.21
   1   1  17    2.49    0.20
   1  -1 -17    2.60    0.21
   2  -1  17   18.29    0.46
   2  -1  17   18.33    0.54
  -2  -1 -17   18.38    0.54
   2   1 -17   18.90    0.52
  -2   1 -17   18.31    0.54
  -2   1 -17   18.13    0.51
   2   1  17   18.24    0.46
   2   1  17   18.13    0.53
  -3  -1 -17   10.39    0.37
   3  -1  17   10.63    0.29
   3   1  17   10.87    0.29
  -3   1 -17   10.00    0.37
   0   2 -17   16.91    0.51
   0  -2 -17   17.40    0.52
   0   2  17   16.24    0.51
   1  -2  17   14.18    0.47
  -1  -2 -17   15.16    0.48
   1   2 -17   15.55    0.46
   1   2  17   14.77    0.47
   1  -2 -17   14.54    0.48
  -1   2 -17   15.04    0.47
  -1   2 -17   14.82    0.44
   2   2 -17    0.00    0.14
   2  -2  17   -0.04    0.13
  -2  -2 -17    0.02    0.16
   2   2  17    0.13    0.14
  -2   2 -17    0.11    0.14
   2   2  17    0.09    0.09
  -2   2 -17    0.14    0.15
   3  -2  17    2.38    0.12
  -3  -2 -17    2.25    0.19
   3   2 -17    2.58    0.18
  -3   2 -17    2.26    0.19
   3   2  17    2.31    0.12
   0  -3 -17   -0.07    0.17
   0   3 -17   -0.15    0.14
   0   3 -17   -0.02    0.15
   0   3  17    0.03    0.14
  -1  -3 -17    2.44    0.22
   1  -3  17    2.48    0.20
   1   3 -17    2.59    0.19
   1   3  17    2.74    0.20
   1  -3 -17    2.42    0.22
  -1   3 -17    2.87    0.19
  -1   3 -17    2.62    0.20
   2   3 -17    3.31    0.20
  -2  -3 -17    3.15    0.22
   2  -3  17    2.99    0.21
  -2   3 -17    3.11    0.21
   2   3  17    3.27    0.21
   2   3  17    3.01    0.16
  -2   3 -17    3.10    0.18
   3   3 -17    1.08    0.15
   3  -3  17    0.97    0.09
  -3  -3 -17    1.00    0.16
   3   3  17    0.94    0.09
   0   4 -17    0.04    0.13
   0   4 -17    0.23    0.14
   0   4  17    0.32    0.15
   0  -4 -17    0.34    0.19
   1   4 -17   12.05    0.39
   1  -4  17   11.04    0.40
  -1  -4 -17   11.50    0.41
   1   4  17   11.92    0.40
   1   4  17   11.53    0.33
  -1   4 -17   11.59    0.39
  -1   4 -17   12.24    0.37
  -2  -4 -17    0.83    0.17
   2   4 -17    1.17    0.15
  -2   4 -17    0.88    0.16
   2   4  17    0.98    0.10
  -2   4 -17    0.73    0.14
   3   4 -17    0.86    0.14
  -3  -4 -17    0.48    0.15
   3  -4  17    0.78    0.10
   3   4  17    0.67    0.08
   0   5 -17    3.25    0.19
   0   5  17    3.17    0.21
   0   5 -17    3.43    0.18
   0  -5 -17    2.89    0.25
  -1  -5 -17    6.57    0.33
   1   5 -17    6.90    0.28
   1   5  17    6.92    0.31
   1   5  17    7.22    0.24
  -1   5 -17    6.95    0.30
  -1   5 -17    7.41    0.28
  -2  -5 -17    1.27    0.18
   2   5 -17    1.25    0.14
   2   5  17    1.23    0.10
  -2   5 -17    1.15    0.13
  -3  -5 -17    0.06    0.14
   3   5  17    0.10    0.07
   0   6 -17    5.80    0.27
   0   6 -17    6.51    0.25
   1   6 -17    1.13    0.14
  -1  -6 -17    0.93    0.19
  -1   6 -17    1.29    0.14
   1   6  17    1.17    0.10
  -1   6 -17    1.43    0.16
   2   6 -17    0.25    0.12
  -2  -6 -17    0.23    0.15
  -2   6 -17    0.13    0.11
   2   6  17    0.35    0.08
   0  -7  17    6.56    0.40
   0   7 -17    6.44    0.25
   0   7 -17    6.43    0.27
   1  -7  17    2.53    0.21
   1   7 -17    2.72    0.16
   1   7  17    2.75    0.15
  -1   7 -17    2.95    0.16
   2   7 -17    1.76    0.14
  -2   7 -17    2.05    0.14
   2   7  17    1.58    0.10
   0  -8  17    1.69    0.21
   0   8 -17    1.66    0.13
  -1   8 -17    6.03    0.23
   1   8  17    5.55    0.20
   0   0 -18    0.15    0.15
  -1   0 -18    2.82    0.20
   1   0 -18    2.99    0.20
  -2   0 -18    2.78    0.19
   2   0 -18    2.41    0.19
   0   1 -18    3.64    0.21
   0  -1 -18    3.69    0.22
  -1  -1 -18    4.31    0.23
   1   1 -18    4.42    0.25
   1  -1 -18    3.97    0.23
  -1   1 -18    3.49    0.21
  -2  -1 -18    3.71    0.21
   2   1 -18    3.21    0.20
   2   1  18    3.41    0.17
  -2   1 -18    3.15    0.20
   0   2 -18    3.64    0.21
   0  -2 -18    3.34    0.21
   1   2 -18    3.58    0.20
  -1  -2 -18    3.52    0.22
  -1   2 -18    3.29    0.29
   1  -2 -18    3.37    0.22
  -1   2 -18    3.44    0.21
   2   2 -18    2.94    0.18
  -2  -2 -18    2.34    0.18
  -2   2 -18    2.89    0.17
   2   2  18    2.75    0.15
  -2   2 -18    2.91    0.19
   0   3 -18    5.64    0.26
   0  -3 -18    5.51    0.30
  -1  -3 -18    1.41    0.17
   1   3 -18    1.46    0.16
  -1   3 -18    1.54    0.16
  -1   3 -18    1.41    0.15
   2   3 -18    0.08    0.13
  -2  -3 -18    0.00    0.14
   2   3  18    0.07    0.08
  -2   3 -18    0.16    0.14
  -2   3 -18    0.08    0.13
   0   4 -18    1.66    0.16
   0   4 -18    1.98    0.16
   0  -4 -18    1.87    0.19
  -1  -4 -18    0.46    0.16
   1   4 -18    0.30    0.13
  -1   4 -18    0.45    0.14
  -1   4 -18    0.16    0.12
  -2  -4 -18    0.31    0.14
   2   4 -18    0.21    0.12
   2   4  18    0.30    0.08
  -2   4 -18    0.16    0.12
   0   5 -18    1.26    0.14
   0   5 -18    1.40    0.14
  -1  -5 -18    3.74    0.22
   1   5 -18    3.77    0.21
  -1   5 -18    3.50    0.17
  -1   5 -18    3.69    0.19
  -2   5 -18    0.65    0.12
   0   6 -18   -0.04    0.11
   0   6 -18    0.14    0.12
   1   6 -18    0.74    0.12
  -1   6 -18    0.86    0.12
   0   0 -19   -0.01    0.13
  -1   0 -19    7.46    0.29
   1   0 -19    7.11    0.29
   0   1 -19    0.08    0.13
   0  -1 -19    0.02    0.14
  -1  -1 -19    1.06    0.15
   1   1 -19    1.26    0.15
  -1   1 -19    1.21    0.15
   0  -2 -19    0.05    0.14
   0   2 -19    0.05    0.12
  -1  -2 -19    4.88    0.25
   1   2 -19    4.83    0.24
  -1   2 -19    4.70    0.24
   0   3 -19    0.37    0.12
   1   3 -19    2.32    0.16
   0   0   0    0.00    0.00
;
_shelx_hkl_checksum   78700
